# Supplementary material for: Upgrading short-read animal genome assemblies to chromosome level using comparative genomics and a universal probe set
Source: PubMed Central journal article supplement (PMC5411781; doi:10.1101/gr.213660.116), 2017-05
Supplement: supp_gr.213660.116_Supplemental_Fig_S5.pdf [file supp_gr.213660.116_Supplemental_Fig_S5.pdf]

**Peregrine:150K**  
126,111,278

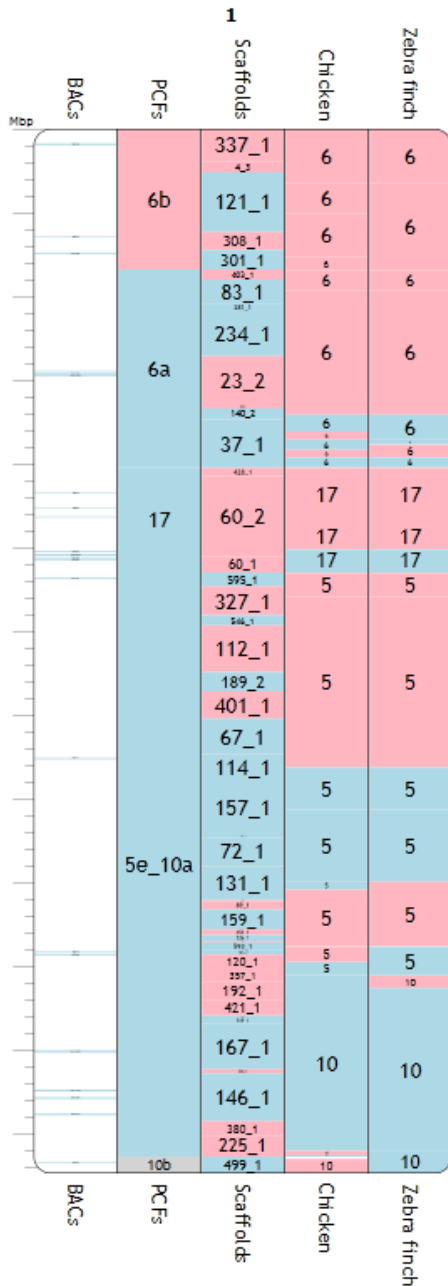

**Peregrine:150K**  
109,099,092

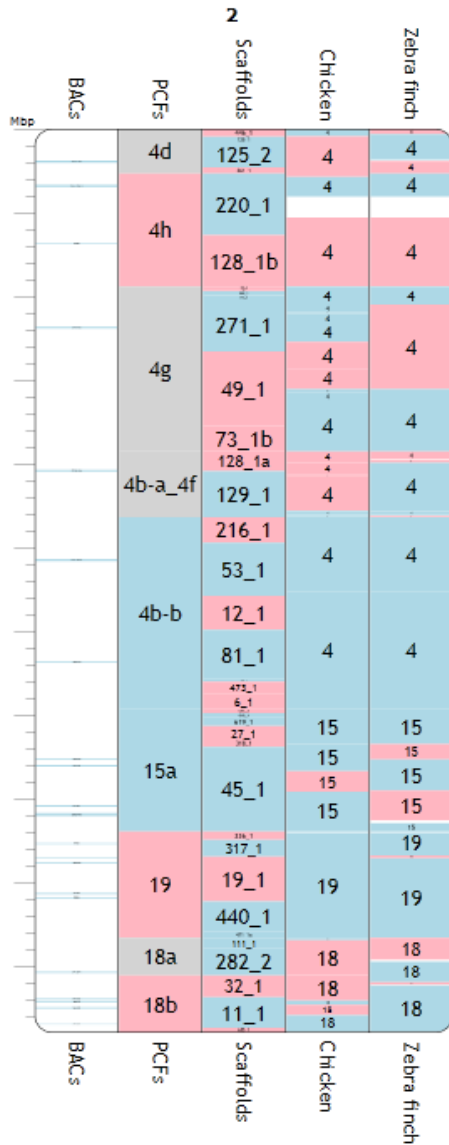

**Peregrine:150K**

99,065,126

3

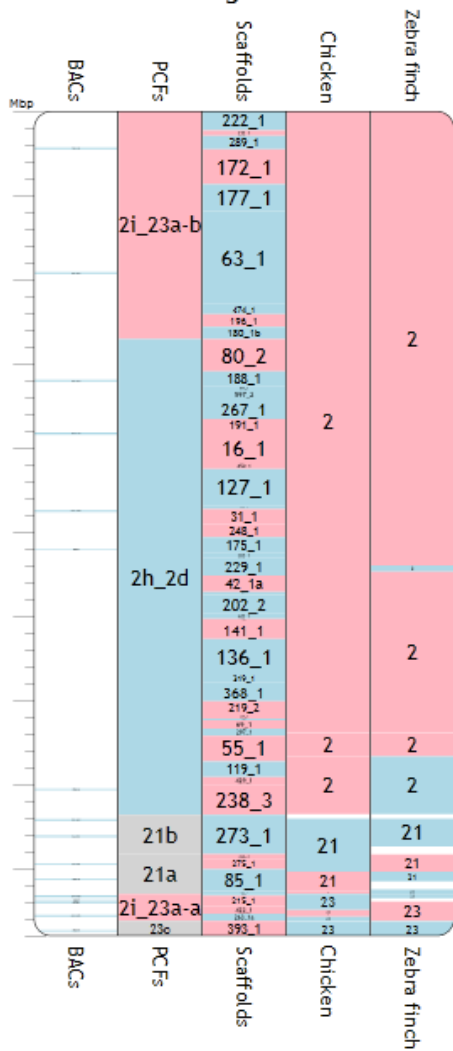

**Peregrine:150K**

118,925,238

4

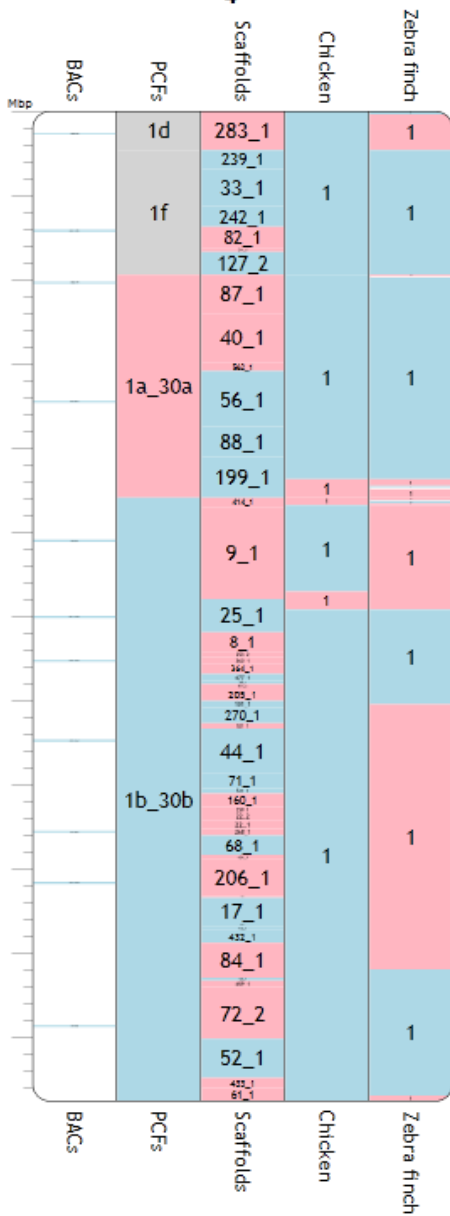

**Peregrine:150K**

101,968,767

5

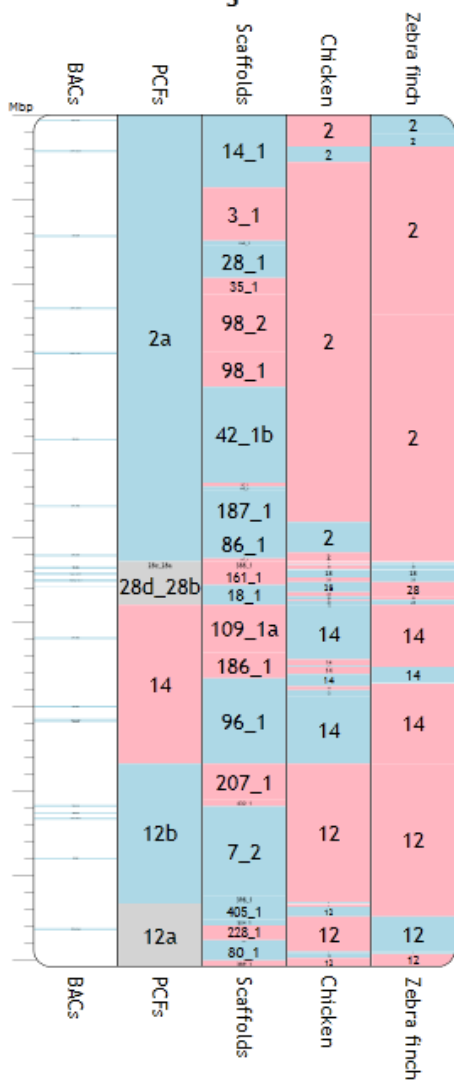

**Peregrine:150K**

81,625,993

6

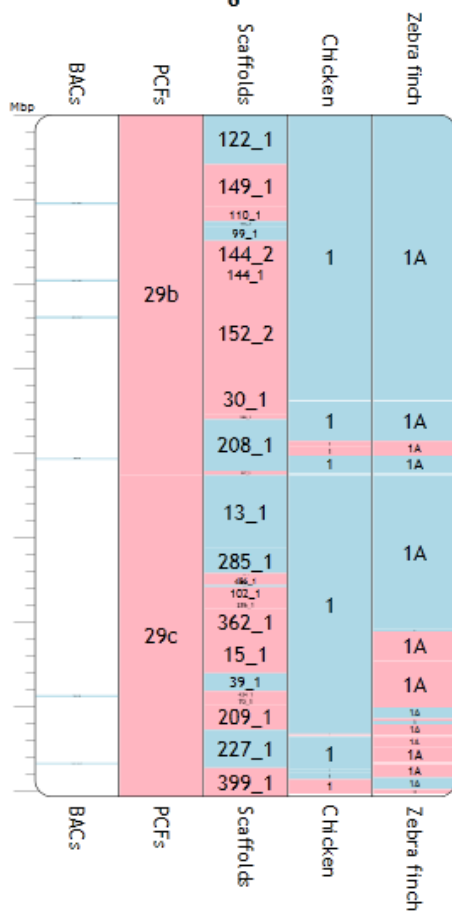

**Peregrine:150K**

88,937,032

**7**

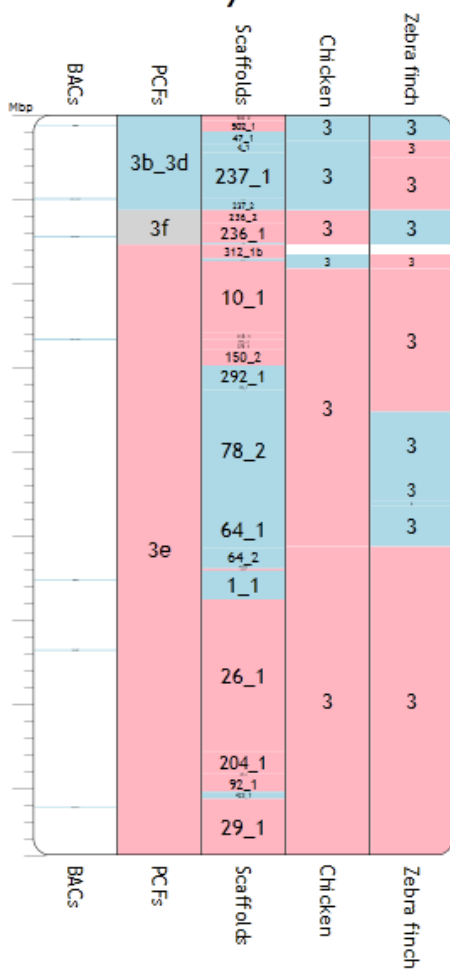

**Peregrine:150K**

63,899,423

**8**

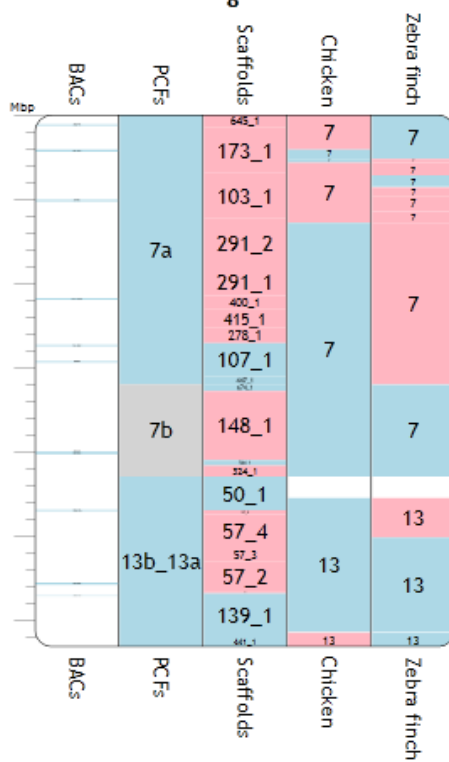

**Peregrine:150K**

36,416,876

**9**

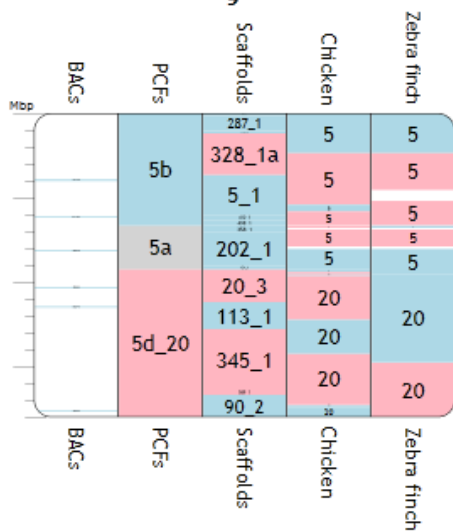

**Peregrine:150K**

27,378,400

**10**

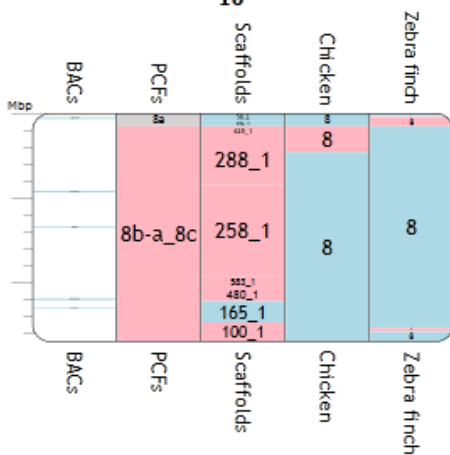

**Peregrine:150K**

33,653,803

**11**

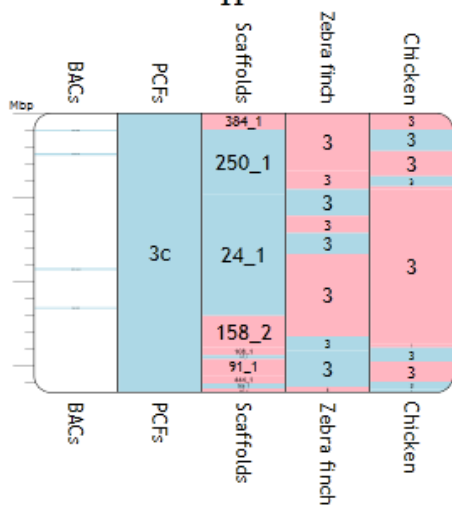

**Peregrine:150K**

29,578,363

**12**

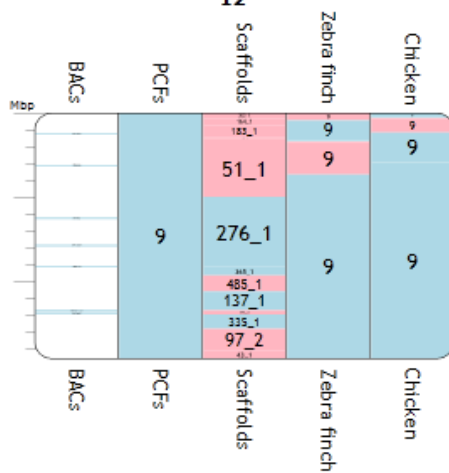

**Peregrine:150K**  
23,730,878

**13**

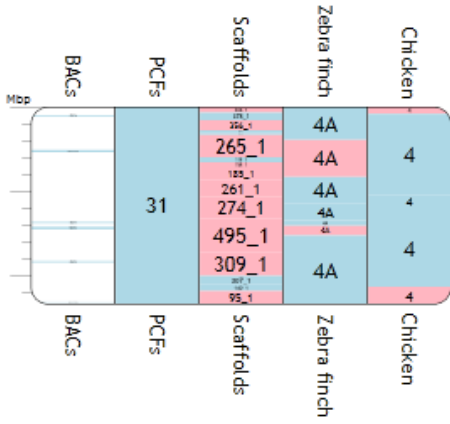

**Peregrine:150K**  
23,292,764

**14**

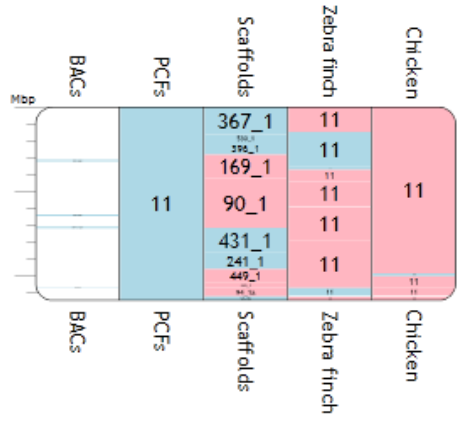

**Peregrine:150K**

7,532,730

**15**

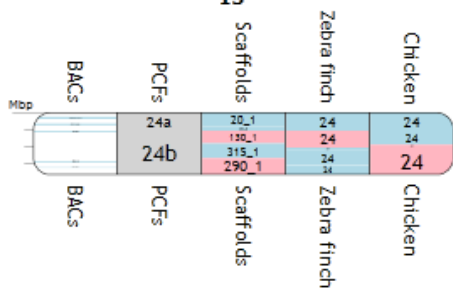

**Peregrine:150K**

6,535,397

**16**

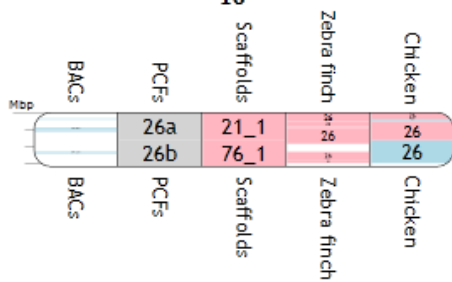



**Peregrine:150K**

5,615,363

**17**

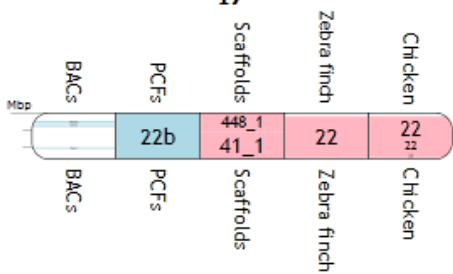

**Peregrine:150K**

4,400,328

**18**

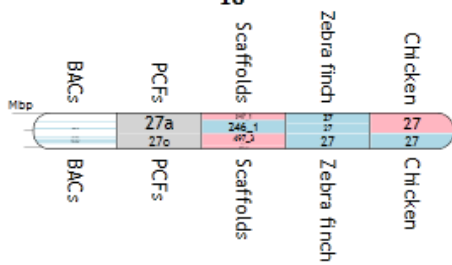

**Peregrine:150K**

40,081,485

**19 (Z)**

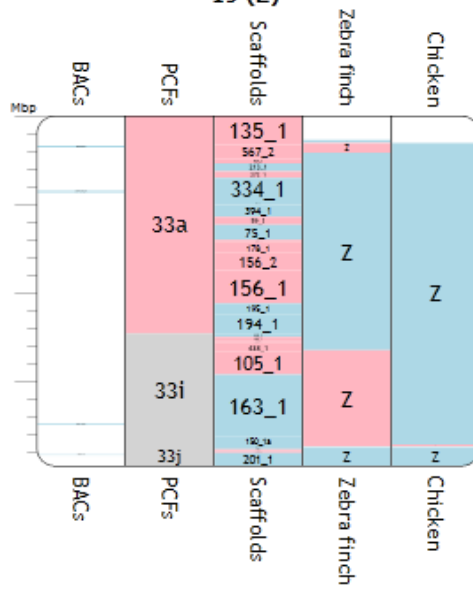

**Peregrine:150K**

2,303,269

**un18c**

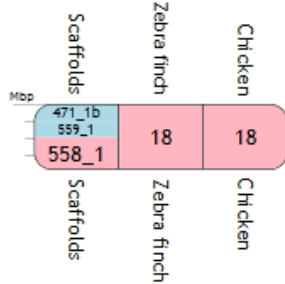

**Peregrine:150K**

9,009,784

**un1c**

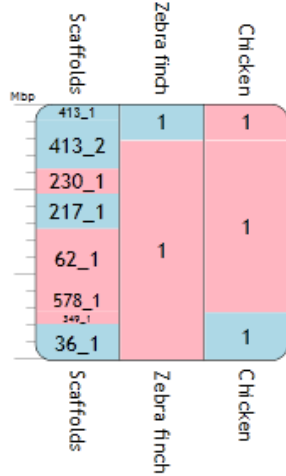

**Peregrine:150K**

2,659,580

**un23b**

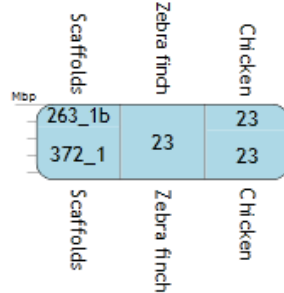

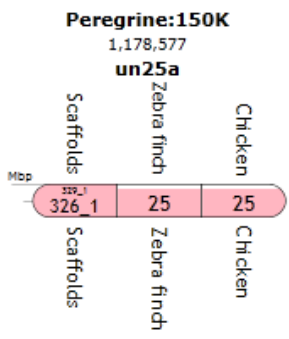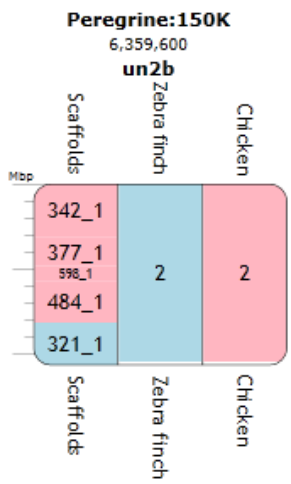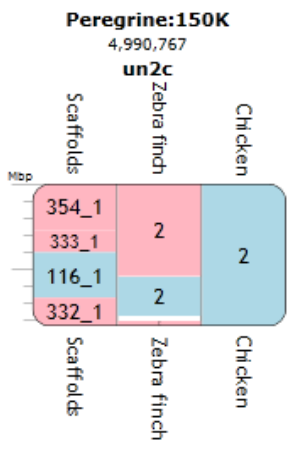

**Peregrine:150K**

8,695,319

**un2e**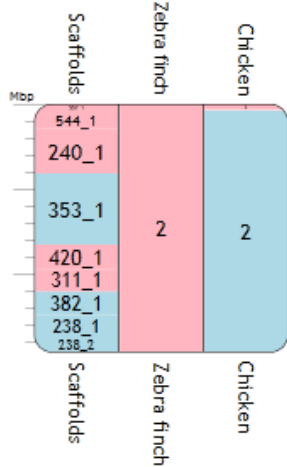**Peregrine:150K**

3,614,853

**un2g**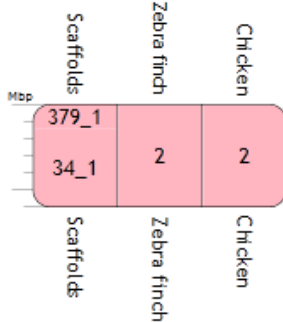**Peregrine:150K**

6,055,273

**un33b**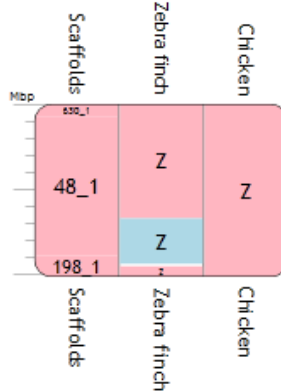

**Peregrine:150K**

12,551,663

**un33c**

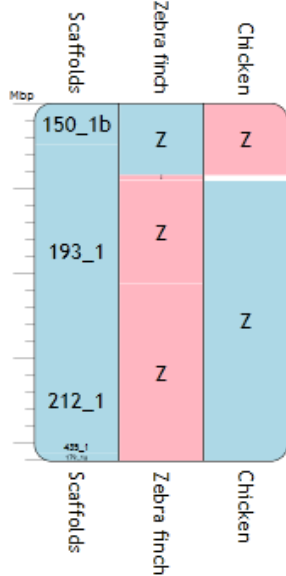

**Peregrine:150K**

8,096,016

**un33f**

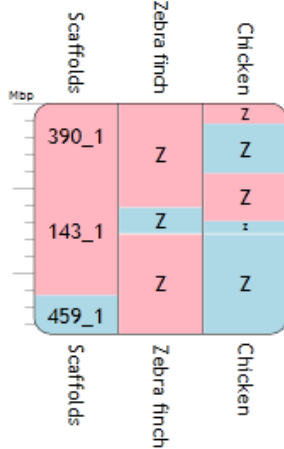

**Peregrine:150K**

2,004,917

**un33g**

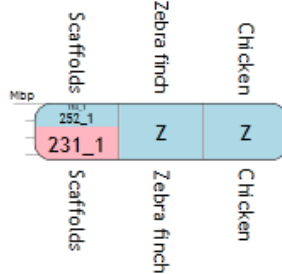

**Peregrine:150K**

5,728,408

**un33h**

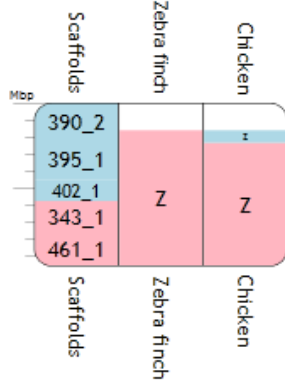

**Peregrine:150K**

3,309,361

**un33k**

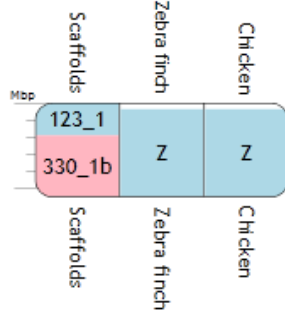

**Peregrine:150K**

7,658,646

**un4c**

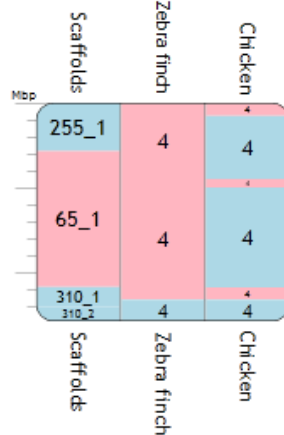

**Supplemental Figure S5.** Falcon chromosomes and unplaced PCFs visualizations from Evolution Highway (<http://eh-demo.ncsa.uiuc.edu/birds>). Blue blocks represent “+” orientation, pink blocks denote “-“ orientation and grey blocks unknown (“?”) orientation. “BACs” track depicts the location of the BAC clones used to place and orient predicted chromosome fragments (PCFs) along the chromosomes. “PCFs” track depicts the position and orientation of the PCFs obtained from RACA (Kim et al. 2013). “Scaffolds” track depicts the position and orientation of the F\_peregrinus\_v1.0 scaffolds (Zhan et al. 2013). “Chicken” and “Zebra finch” tracks depict the pairwise homologous synteny blocks (HSBs) between falcon and chicken, falcon and zebra finch genomes, respectively.
