# Supplementary material for: Upgrading short-read animal genome assemblies to chromosome level using comparative genomics and a universal probe set
Source: Genome Res. 2017 May;27(5):875–84. doi: 10.1101/gr.213660.116 (PMC5411781; doi:10.1101/gr.213660.116)
Supplement: Supplemental Material [file supp_gr.213660.116_Supplemental_Table_S5.xlsx]

## Sheet: Final BAC clone panel
Supplemental Table S5: Final panel of BAC clones and hybridization results.
Set type	BAC clone ID	Chicken chromosome	Chicken start (bp)	Chicken end (bp)	Chicken signal	Turkey signal	Pigeon signal	Peregrine signal	Zebra finch signal	Maximum species divergence time (MY) with hybridization signal
Random	CH261-89C18	1	826430	997896	Yes	Yes	Yes	Yes	Yes	89
Random	TGMCBA-206D5	1	6317911	6466032	Yes	No	Yes	Yes	Yes	89
Selected	CH261-89G23	1	20319376	20556326	Yes	Yes	Yes	Yes	No	89
Selected	CH261-119K2	1	29569857	29806173	Yes	Yes	Yes	Yes	No	89
Selected	CH261-120J2	1	33969713	34203326	Yes	Yes	No	Yes	No	89
Selected	CH261-36B5	1	66061749	66269352	Yes	Yes	Yes	Yes	Yes	89
Selected	CH261-25P18	1	71625759	71868403	Yes	Yes	Yes	Yes	No	89
Selected	CH261-125F1	1	76545256	76752637	Yes	Yes	No	No	Yes	89
Random	TGMCBA-146O14	1	86207012	86371517	Yes	Yes	Yes	Yes	Yes	89
Selected	CH261-118M1	1	97719169	97948479	Yes	Yes	Yes	Yes	Yes	89
Random	TGMCBA-183G8	1	105003882	105132029	No	Yes	No	No	Yes	89
Random	TGMCBA-204O4	1	105834005	106008724	Yes	No	Yes	Yes	Yes	89
Selected	CH261-18J16	1	109840436	110098905	Yes	Yes	Yes	No	Yes	89
Selected	CH261-29N14	1	120109802	120306481	Yes	Yes	Yes	Yes	Yes	89
Selected	CH261-9B17	1	131954478	132159072	Yes	Yes	Yes	Yes	Yes	89
Selected	CH261-168O17	1	140200039	140446061	Yes	Yes	Yes	Yes	Yes	89
Selected	CH261-83O13	1	145493141	145732798	Yes	Yes	Yes	Yes	Yes	89
Selected	CH261-107E2	1	155077290	155306349	Yes	Yes	Yes	Yes	Yes	89
Selected	CH261-58K12	1	166052819	166255472	Yes	Yes	Yes	Yes	Yes	89
Selected	CH261-184E5	1	172154705	172388714	Yes	Yes	Yes	Yes	Yes	89
Random	CH261-98G4	1	189398394	189581262	Yes	Yes	Yes	Yes	Yes	89
Random	TGMCBA-167P13	1	193484829	193671838	No	No	No	Yes	Yes	60
Random	CH261-192C19	2	640678	817176	Yes	Yes	Yes	Yes	Yes	89
Selected	CH261-169N6	2	5846212	6041793	Yes	Yes	Yes	Yes	Yes	89
Selected	CH261-172N3	2	13873886	14022156	Yes	Yes	Yes	Yes	Yes	89
Selected	CH261-177K1	2	24103323	24346901	Yes	Yes	Yes	Yes	Yes	89
Selected	CH261-186J5	2	29494034	29721863	Yes	Yes	Yes	Yes	Yes	89
Selected	CH261-40G6	2	38161264	38349127	Yes	Yes	Yes	Yes	Yes	89
Selected	CH261-50C15	2	43817744	44052880	Yes	Yes	Yes	Yes	Yes	89
Selected	CH261-123O22	2	48112621	48290667	Yes	Yes	No	Yes	Yes	89
Selected	TGMCBA-340P4	2	66935741	67090903	Yes	No	Yes	Yes	Yes	89
Selected	CH260-1M4	2	80914548	81116182	No	Yes	Yes	No	No	89
Selected	TGMCBA-78C11	2	98646159	98772400	Yes	No	Yes	Yes	Yes	89
Selected	CH261-169E4	2	103241761	103471020	Yes	Yes	Yes	Yes	Yes	89
Selected	CH261-1J20	2	112540892	112776283	Yes	Yes	Yes	Yes	Yes	89
Selected	CH261-44D16	2	118894877	119099952	Yes	Yes	Yes	Yes	Yes	89
Selected	CH261-44H14	2	127911344	128117060	Yes	Yes	Yes	Yes	Yes	89
Random	CH261-17J16	2	142898639	143079792	Yes	Yes	No	Yes	Yes	89
Random	CH261-115J5	3	62801	245437	Yes	Yes	Yes	Yes	Yes	89
Random	TGMCBA-295P5	3	9939896	10058922	Yes	Yes	Yes	Yes	Yes	89
Selected	CH261-18I9	3	14458377	14680810	Yes	Yes	Yes	Yes	Yes	89
Selected	CH261-130M12	3	20542045	20707498	Yes	Yes	Yes	Yes	Yes	89
Selected	CH261-160I6	3	25180860	25408942	Yes	Yes	Yes	Yes	Yes	89
Selected	CH261-97P20	3	40123190	40359654	Yes	Yes	Yes	Yes	Yes	89
Selected	CH261-17B14	3	65251594	65475612	Yes	Yes	Yes	Yes	Yes	89
Selected	TGMCBA-250J17	3	76339309	76510643	Yes	Yes	Yes	Yes	Yes	89
Selected	CH261-169K18	3	95231660	95372232	Yes	Yes	Yes	Yes	Yes	89
Random	TGMCBA-64D9	3	103642372	103763457	Yes	Yes	Yes	Yes	Yes	89
Random	CH261-120H23	3	107693895	107874596	Yes	Yes	Yes	Yes	Yes	89
Random	CH261-183B15	4	217546	416433	Yes	Yes	No	Yes	No	89
Selected	TGMCBA-330J11	4	3422963	3555119	No	Yes	Yes	Yes	Yes	89
Selected	CH261-83E1	4	4003197	4175284	Yes	Yes	Yes	Yes	Yes	89
Selected	CH261-71L6	4	4061293	4249089	Yes	YES	Yes	Yes	No	89
Random	TGMCBA-280M7	4	8124301	8265851	No	Yes	Yes	Yes	Yes	89
Random	TGMCBA-220A5	4	11115894	11264251	No	Yes	Yes	Yes	Yes	89
Selected	CH261-111A15	4	15329891	15552198	Yes	Yes	Yes	Yes	Yes	89
Selected	TGMCBA-200G5	4	16276699	16422023	No	Yes	Yes	No	Yes	89
Selected	CH261-18C6	4	30117545	30370391	Yes	Yes	Yes	Yes	Yes	89
Selected	CH261-93H1	4	37167348	37383279	Yes	Yes	Yes	Yes	Yes	89
Selected	CH261-185L11	4	42706698	42972497	Yes	Yes	Yes	Yes	Yes	89
Random	TGMCBA-104H6	4	49345327	49556833	Yes	No	Yes	Yes	Yes	89
Selected	CH261-85H10	4	64707690	64953032	Yes	Yes	Yes	Yes	Yes	89
Selected	CH261-89P6	4	73638906	73780597	Yes	Yes	Yes	Yes	Yes	89
Random	TGMCBA-216A16	4	84684219	84838062	Yes	Yes	Yes	Yes	Yes	89
Random	CH261-125K8	4	87229593	87417780	Yes	Yes	No	No	No	28
Random	CH261-73F2	5	1044034	1239204	Yes	Yes	No	No	No	28
Selected	CH261-49B22	5	5162008	5355408	Yes	Yes	Yes	Yes	Yes	89
Selected	CH261-122F8	5	9402313	9572742	Yes	Yes	Yes	Yes	Yes	89
Random	TGMCBA-145C6	5	16566138	16714631	Yes	Yes	Yes	Yes	Yes	89
Selected	CH261-78F13	5	24364719	24551738	Yes	Yes	Yes	Yes	Yes	89
Selected	CH261-2I23	5	25797529	25965423	Yes	Yes	No	Yes	Yes	89
Random	CH261-161B22	5	57124535	57283264	Yes	Yes	Yes	Yes	No	89
Random	TGMCBA-24C1	5	57502824	57654347	Yes	Yes	Yes	Yes	Yes	89
Random	CH261-94G14	6	312138	495952	Yes	Yes	Yes	Yes	No	89
Selected	TGMCBA-382J4	6	2376226	2513780	Yes	Yes	Yes	Yes	Yes	89
Selected	CH261-67H5	6	21753317	22002790	Yes	Yes	Yes	Yes	Yes	89
Selected	CH261-165L8	6	22002910	22198637	Yes	Yes	No	Yes	Yes	89
Selected	CH261-49F3	6	22289806	22402526	Yes	Yes	Yes	Yes	Yes	89
Random	CH261-179F2	6	34514355	34683564	Yes	Yes	No	Yes	No	89
Selected	TGMCBA-34L13	7	37194	141451	No	Yes	Yes	Yes	Yes	89
Random	CH261-112D24	7	102974	270365	Yes	Yes	Yes	Yes	No	89
Selected	CH261-56K7	7	3586775	3748429	Yes	Yes	Yes	Yes	Yes	89
Selected	TGMCBA-224O13	7	10237883	10384434	Yes	Yes	Yes	Yes	Yes	89
Selected	CH261-180H18	7	19984877	20218119	Yes	Yes	Yes	Yes	Yes	89
Selected	CH261-186K14	7	25589810	25765994	Yes	Yes	Yes	Yes	Yes	89
Random	TGMCBA-356H21	7	27601787	27722703	No	No	No	Yes	Yes	60
Random	TGMCBA-81K22	7	35759099	35912320	No	No	No	Yes	Yes	60
Random	CH261-38E18	7	35910364	36101474	Yes	Yes	No	Yes	No	89
Selected	CH261-69H1	8	3952671	4152719	Yes	Yes	Yes	Yes	Yes	89
Selected	CH261-107D8	8	4514731	4739630	Yes	Yes	Yes	Yes	Yes	89
Random	TGMCBA-346F6	8	7567961	7740325	Yes	Yes	Yes	Yes	Yes	89
Selected	CH261-34H16	8	14589171	14784055	Yes	Yes	Yes	Yes	Yes	89
Selected	TGMCBA-252A4	8	18876808	19004890	Yes	Yes	Yes	Yes	Yes	89
Random	TGMCBA-208D17	8	27465718	27673033	Yes	Yes	Yes	Yes	Yes	89
Random	CH261-96D24	8	28504295	28697585	Yes	Yes	Yes	Yes	Yes	89
Random	CH261-183N19	9	72535	247137	Yes	Yes	Yes	Yes	Yes	89
Random	TGMCBA-150E19	9	5007304	5166177	No	No	No	Yes	Yes	60
Selected	CH261-95N3	9	11360741	11554406	Yes	Yes	Yes	Yes	Yes	89
Selected	CH261-187M16	9	14631745	14820145	Yes	Yes	Yes	Yes	Yes	89
Selected	TGMCBA-321L6	9	17198556	17369679	Yes	Yes	No	Yes	Yes	89
Random	TGMCBA-217A3	9	22441416	22707222	No	No	No	Yes	Yes	60
Random	CH261-68O18	9	22846813	23038360	Yes	Yes	No	Yes	No	89
Random	CH261-94C12	10	394709	571329	Yes	Yes	No	No	No	28
Random	TGMCBA-48L18	10	1558350	1692206	Yes	No	No	Yes	Yes	89
Selected	CH261-115G24	10	11413550	11625715	Yes	Yes	Yes	Yes	Yes	89
Selected	CH261-71G18	10	16137296	16355683	Yes	Yes	Yes	Yes	Yes	89
Random	CH261-118E15	10	17042068	17226501	Yes	Yes	No	Yes	No	89
Random	TGMCBA-310P11	10	19027319	19200657	Yes	No	No	Yes	Yes	89
Random	TGMCBA-192A10	11	373966	491611	Yes	Yes	Yes	Yes	Yes	89
Selected	CH261-121N21	11	8069617	8312249	Yes	Yes	Yes	Yes	Yes	89
Selected	CH261-138H13	11	9551130	9731707	Yes	Yes	Yes	Yes	Yes	89
Selected	CH261-154H1	11	16102045	16317215	Yes	Yes	Yes	Yes	Yes	89
Random	CH261-88K1	12	372959	564980	Yes	Yes	No	No	No	28
Random	TGMCBA-305E19	12	6043763	6221718	No	Yes	Yes	Yes	Yes	89
Selected	CH261-60P3	12	12073689	12215683	Yes	Yes	Yes	Yes	Yes	89
Selected	CH261-90N18	12	12934657	13093207	Yes	Yes	Yes	No	Yes	89
Selected	CH261-95H20	12	16795957	17016912	Yes	Yes	Yes	Yes	Yes	89
Random	TGMCBA-342P15	12	17478676	17619735	Yes	Yes	Yes	Yes	Yes	89
Selected	CH261-4M5	12	18331547	18523869	Yes	Yes	Yes	Yes	Yes	89
Random	CH261-152H14	12	19286894	19482605	Yes	Yes	No	No	No	28
Random	CH261-71N1	13	203181	371343	Yes	Yes	No	No	No	28
Random	TGMCBA-266O5	13	4610378	4781338	Yes	Yes	Yes	Yes	Yes	89
Selected	CH261-11H24	13	10147915	10275061	Yes	Yes	No	No	No	28
Selected	CH261-115I12	13	13356620	13550841	Yes	Yes	Yes	Yes	Yes	89
Selected	CH261-59M8	13	13415153	13615434	Yes	Yes	Yes	Yes	Yes	89
Selected	TGMCBA-321B13	13	14903339	15053072	Yes	Yes	Yes	Yes	Yes	89
Random	CH261-58H5	13	16276083	16505530	Yes	Yes	No	No	No	28
Selected	CH261-49P24	14	2126499	2290457	Yes	Yes	Yes	Yes	Yes	89
Selected	CH261-122H14	14	3691588	3889704	Yes	Yes	Yes	Yes	Yes	89
Selected	TGMCBA-205N19	14	3956137	4101098	Yes	Yes	Yes	Yes	Yes	89
Selected	CH261-69D20	14	12441486	12628845	Yes	Yes	Yes	Yes	Yes	89
Random	CH261-131E4	15	33072	223700	Yes	Yes	No	No	No	28
Selected	CH261-90P23	15	1651110	1836498	Yes	Yes	Yes	Yes	Yes	89
Selected	CH261-48M1	15	2637953	2821838	Yes	Yes	Yes	Yes	Yes	89
Random	TGMCBA-231D20	15	2759775	2963958	No	No	No	Yes	Yes	60
Selected	TGMCBA-266G23	15	11679111	11833972	Yes	Yes	Yes	Yes	Yes	89
Random	CH261-40D6	15	12447806	12640948	Yes	Yes	Yes	Yes	No	89
Random	CH261-72P11	17	180148	368824	Yes	Yes	No	No	No	28
Random	TGMCBA-185B22	17	830105	931604	Yes	Yes	Yes	Yes	Yes	89
Selected	TGMCBA-67H23	17	1929300	2049732	No	Yes	Yes	Yes	Yes	89
Selected	TGMCBA-375I5	17	3741293	3870581	Yes	Yes	Yes	Yes	Yes	89
Selected	CH261-113A7	17	8496851	8643900	Yes	Yes	Yes	Yes	Yes	89
Random	TGMCBA-197G19	17	8896131	9077434	Yes	Yes	Yes	Yes	Yes	89
Selected	CH261-42P16	17	9212243	9384265	Yes	Yes	Yes	Yes	Yes	89
Random	CH261-69M11	17	9481008	9650021	Yes	Yes	No	Yes	No	89
Random	CH261-67N15	18	159182	343200	Yes	Yes	No	Yes	Yes	89
Selected	CH261-60N6	18	4361850	4577933	Yes	Yes	Yes	Yes	Yes	89
Selected	TGMCBA-263I20	18	4517555	4662859	Yes	Yes	No	Yes	Yes	89
Selected	CH261-137B21	18	6091090	6242853	Yes	Yes	No	Yes	No	89
Selected	CH261-118D24	18	6845464	7015909	Yes	Yes	Yes	Yes	Yes	89
Random	CH261-72B18	18	11022256	11194579	Yes	Yes	Yes	Yes	Yes	89
Selected	CH261-10F1	19	1418025	1558554	Yes	Yes	Yes	Yes	Yes	89
Random	TGMCBA-307H9	19	3195095	3311811	Yes	Yes	Yes	Yes	Yes	89
Selected	TGMCBA-356O18	19	3748122	3895708	Yes	Yes	Yes	Yes	Yes	89
Selected	CH261-50H12	19	7445191	7596603	Yes	Yes	Yes	Yes	Yes	89
Random	TGMCBA-84A3	19	7968445	8093059	Yes	Yes	Yes	Yes	Yes	89
Random	CH261-124A24	20	120009	284188	Yes	Yes	No	No	No	28
Random	TGMCBA-250E3	20	421457	570315	No	Yes	Yes	Yes	Yes	89
Random	TGMCBA-225I12	20	8551193	8708540	Yes	No	Yes	Yes	Yes	89
Selected	TGMCBA-341F20	20	10890041	11017721	Yes	Yes	Yes	Yes	Yes	89
Random	CH261-10L6	20	14021149	14221366	Yes	Yes	No	No	No	28
Random	CH261-10A18	21	216521	417206	Yes	Yes	No	Yes	No	89
Selected	TGMCBA-119I6	21	1190978	1303010	No	Yes	No	No	Yes	89
Selected	CH261-83I20	21	2228130	2421978	Yes	Yes	Yes	Yes	Yes	89
Selected	CH261-122K8	21	3753855	3934968	Yes	Yes	Yes	Yes	Yes	89
Selected	TGMCBA-134A8	21	5501865	5657824	Yes	Yes	No	Yes	Yes	89
Random	CH261-49L18	21	6463972	6652855	Yes	Yes	No	No	No	28
Random	CH261-30D24	22	13919	194754	Yes	Yes	No	No	No	28
Selected	CH261-40J9	22	2014467	2192777	Yes	Yes	Yes	Yes	Yes	89
Selected	CH261-18G17	22	2432263	2647085	Yes	Yes	Yes	Yes	Yes	89
Random	TGMCBA-113N13	22	2441625	2601495	Yes	Yes	Yes	Yes	Yes	89
Random	TGMCBA-151I22	22	3256244	3427660	No	No	No	Yes	Yes	60
Random	CH261-49B2	22	3843110	4029658	Yes	Yes	No	No	No	28
Random	CH261-191G17	23	5018	223295	Yes	Yes	Yes	Yes	Yes	89
Selected	TGMCBA-173N15	23	4268881	4404285	Yes	No	No	Yes	Yes	89
Selected	CH261-105P1	23	4304362	4489101	Yes	Yes	Yes	Yes	Yes	89
Random	TGMCBA-272G9	23	4593461	4793372	No	No	No	Yes	Yes	60
Selected	CH261-49G9	23	4628133	4849754	Yes	Yes	Yes	Yes	Yes	89
Selected	TGMCBA-48O8	23	5158595	5284109	Yes	No	No	Yes	Yes	89
Selected	CH261-90K11	23	5400350	5562615	Yes	Yes	Yes	Yes	Yes	89
Random	CH261-154L15	24	254790	442140	Yes	Yes	No	No	No	28
Selected	CH261-103F4	24	1495926	1647877	Yes	Yes	Yes	Yes	Yes	89
Random	TGMCBA-111K1	24	2213276	2354040	Yes	Yes	Yes	Yes	Yes	89
Selected	CH261-65O4	24	3200064	3351622	Yes	Yes	Yes	Yes	Yes	89
Random	TGMCBA-82A15	24	4874505	5134939	Yes	Yes	Yes	Yes	Yes	89
Random	CH261-154H17	24	5675402	5872982	Yes	Yes	No	Yes	No	89
Random	TGMCBA-65M1	25	788933	1016492	No	Yes	Yes	No	Yes	89
Random	CH261-82G24	25	899856	1066193	Yes	Yes	No	No	No	28
Selected	CH261-59C21	25	1019036	1162925	Yes	Yes	Yes	No	No	89
Selected	CH261-127K7	25	1061651	1174912	Yes	Yes	Yes	No	No	89
Random	CH261-169N16	25	1429699	1602431	Yes	Yes	No	No	No	28
Random	CH261-50J5	26	269995	448388	Yes	Yes	No	No	No	28
Random	TGMCBA-332G15	26	1263122	1338812	Yes	No	Yes	Yes	Yes	89
Selected	TGMCBA-297G21	26	1489981	1598968	Yes	Yes	Yes	Yes	Yes	89
Selected	CH261-186M13	26	1554444	1731104	Yes	Yes	Yes	Yes	Yes	89
Selected	CH261-170L23	26	3688292	3882865	Yes	Yes	Yes	Yes	Yes	89
Random	TGMCBA-97D20	26	4019988	4105401	Yes	No	Yes	Yes	Yes	89
Random	CH261-40C14	26	4320095	4530686	Yes	Yes	No	No	No	28
Selected	TGMCBA-232I2	26	4719284	4808938	No	Yes	No	Yes	Yes	89
Random	CH261-167J20	27	176170	354014	Yes	Yes	No	No	No	28
Random	TGMCBA-23C5	27	1977720	2136272	No	No	Yes	Yes	Yes	69
Random	TGMCBA-324P4	27	2888091	2985209	No	Yes	Yes	Yes	Yes	89
Selected	CH261-66M16	27	4431726	4607863	Yes	Yes	Yes	Yes	Yes	89
Selected	CH261-28L10	27	4809590	5025707	Yes	Yes	Yes	Yes	Yes	89
Random	CH261-100E5	27	5025802	5190528	Yes	Yes	No	Yes	No	89
Random	CH261-16I3	28	110610	275883	Yes	Yes	No	No	No	28
Random	TGMCBA-37M13	28	270544	525686	No	No	No	Yes	Yes	60
Random	TGMCBA-231J13	28	2006355	2081206	No	No	No	Yes	Yes	60
Selected	CH261-64A15	28	3462564	3632644	Yes	Yes	Yes	Yes	Yes	89
Selected	CH261-186C5	28	3467994	3603450	Yes	Yes	No	Yes	Yes	89
Selected	CH261-72A10	28	4134415	4344571	Yes	Yes	Yes	Yes	Yes	89
Random	CH261-101C8	28	4192504	4387278	Yes	Yes	Yes	Yes	No	89
Random	TGMCBA-200J22	Z	1395029	1575234	Yes	No	Yes	Yes	Yes	89
Selected	CH261-129A16	Z	6524854	6750728	Yes	Yes	Yes	Yes	Yes	89
Selected	CH261-133M4	Z	32114620	32306839	Yes	Yes	Yes	Yes	Yes	89
Random	TGMCBA-270I9	Z	55607345	55764093	Yes	No	Yes	Yes	Yes	89
Random	CH261-137F19	Z	80931243	81139996	Yes	Yes	No	No	No	28
