# Supplementary material for: Upgrading short-read animal genome assemblies to chromosome level using comparative genomics and a universal probe set
Source: Genome Res. 2017 May;27(5):875–84. doi: 10.1101/gr.213660.116 (PMC5411781; doi:10.1101/gr.213660.116)
Supplement: Supplemental Material [file supp_gr.213660.116_Supplemental_Table_S6.xlsx]

## Sheet: Peregrine falcon
Supplemental Table S6: Peregrine falcon chromosome assembly.
Peregine falcon chr	Chr start (bp)	Chr end (bp)	Scaffold ID	Scaffold start	Scaffold end	Scaffold orientation in chr	PCF ID	PCF start (bp)	PCF end (bp)	Scaffold orientation in PCF
1	0	3886125	337_1	0	3886125	-	6b	13092820	16978945	+
1	3886225	5228259	4_3	0	1342034	-	6b	11750686	13092720	+
1	5228359	12450258	121_1	0	7221899	+	6b	4528687	11750586	-
1	12450358	14599446	308_1	0	2149088	-	6b	2379499	4528587	+
1	14599546	16978945	301_1	0	2379399	+	6b	0	2379399	-
1	16979045	18180480	403_1	0	1201435	-	6a	0	1201435	-
1	18180580	21071125	83_1	0	2890545	+	6a	1201535	4092080	+
1	21071225	21996332	281_1	0	925107	+	6a	4092180	5017287	+
1	21996432	27432810	234_1	33	5436411	+	6a	5017387	10453765	+
1	27432910	33334510	23_2	0	5901600	-	6a	10453865	16355465	-
1	33334610	33724882	23_1	0	390272	-	6a	16355565	16745837	-
1	33724982	35047307	140_2	0	1322325	+	6a	16745937	18068262	+
1	35047407	40893023	37_1	0	5845616	+	6a	18068362	23913978	+
1	40893123	41902869	428_1	0	1009746	-	17	0	1009746	-
1	41902969	51675956	60_2	0	9772987	-	17	1009846	10782833	-
1	51676056	53569324	60_1	0	1893268	-	17	10782933	12676201	-
1	53569424	55209991	595_1	0	1640567	+	5e_10a	0	1640567	+
1	55210091	58710131	327_1	0	3500040	-	5e_10a	1640667	5140707	-
1	58710231	59983569	546_1	71	1273409	+	5e_10a	5140807	6414145	+
1	59983669	65565781	112_1	0	5582112	-	5e_10a	6414245	11996357	-
1	65565881	67915910	189_2	0	2350029	+	5e_10a	11996457	14346486	+
1	67916010	71191760	401_1	0	3275750	-	5e_10a	14346586	17622336	-
1	71191860	75483817	67_1	0	4291957	+	5e_10a	17622436	21914393	+
1	75483917	78598589	114_1	33	3114705	+	5e_10a	21914493	25029165	+
1	78598689	85257829	157_1	0	6659140	+	5e_10a	25029265	31688405	+
1	85257929	85505188	1106_1	0	247259	+	5e_10a	31688505	31935764	+
1	85505288	89003033	72_1	33	3497778	+	5e_10a	31935864	35433609	+
1	89003133	93123568	131_1	0	4120435	+	5e_10a	35433709	39554144	+
1	93123668	93309161	686_1	0	185493	-	5e_10a	39554244	39739737	-
1	93309261	94202832	89_1	0	893571	-	5e_10a	39739837	40633408	-
1	94202932	96638484	159_1	0	2435552	+	5e_10a	40633508	43069060	+
1	96638584	97317954	453_1	0	679370	-	5e_10a	43069160	43748530	-
1	97318054	97982062	536_1	0	664008	+	5e_10a	43748630	44412638	+
1	97982162	98149112	642_1	0	166950	-	5e_10a	44412738	44579688	-
1	98149212	99163517	593_1	33	1014338	+	5e_10a	44579788	45594093	+
1	99163617	99690884	104_1	0	527267	+	5e_10a	45594193	46121460	+
1	99690984	101444286	120_1	0	1753302	-	5e_10a	46121560	47874862	-
1	101444386	102885018	357_1	0	1440632	-	5e_10a	47874962	49315594	-
1	102885118	105107042	192_1	0	2221924	-	5e_10a	49315694	51537618	-
1	105107142	107053737	421_1	0	1946595	-	5e_10a	51537718	53484313	-
1	107053837	107316061	729_1	0	262224	+	5e_10a	53484413	53746637	+
1	107316161	107957317	519_1	0	641156	+	5e_10a	53746737	54387893	+
1	107957417	113529760	167_1	0	5572343	+	5e_10a	54387993	59960336	+
1	113529860	114029884	323_1	0	500024	-	5e_10a	59960436	60460460	-
1	114029984	119787992	146_1	0	5758008	+	5e_10a	60460560	66218568	+
1	119788092	121484503	380_1	0	1696411	-	5e_10a	66218668	67915079	-
1	121484603	124057181	225_1	0	2572578	-	5e_10a	67915179	70487757	-
1	124057281	126111278	499_1	0	2053997	?	10b	0	2053997	+
2	0	932706	446_1	0	932706	?	4d	0	932706	-
2	932806	1625545	125_1	0	692739	?	4d	932806	1625545	+
2	1625645	4617949	125_2	0	2992304	?	4d	1625645	4617949	+
2	4618049	5375864	361_1	0	757815	?	4d	4618049	5375864	-
2	5375964	12831614	220_1	0	7455650	+	4h	6208136	13663786	-
2	12831714	19039750	128_1b	2364245	8572281	-	4h	0	6208036	+
2	19039850	19426371	483_3	0	386521	?	4g	0	386521	-
2	19426471	19608671	483_1	0	182200	?	4g	386621	568821	-
2	19608771	20095979	200_1	0	487208	?	4g	568921	1056129	+
2	20096079	20601863	54_1	0	505784	?	4g	1056229	1562013	+
2	20601963	26873349	271_1	0	6271386	?	4g	1562113	7833499	+
2	26873449	35860323	49_1	0	8986874	?	4g	7833599	16820473	-
2	35860423	38959073	73_1b	1666522	4765172	?	4g	16820573	19919223	-
2	38959173	41323418	128_1a	0	2364245	?	4b-a_4f	0	2364245	-
2	41323518	46889343	129_1	0	5565825	?	4b-a_4f	2364345	7930170	+
2	46889443	49932574	216_1	0	3043131	-	4b-b	0	3043131	-
2	49932674	56385179	53_1	5	6452510	+	4b-b	3043231	9495736	+
2	56385279	60487154	12_1	0	4101875	-	4b-b	9495836	13597711	-
2	60487254	66419757	81_1	33	5932536	+	4b-b	13597811	19530314	+
2	66419857	66749894	605_1	0	330037	+	4b-b	19530414	19860451	+
2	66749994	68250903	473_1	0	1500909	-	4b-b	19860551	21361460	-
2	68251003	69970741	6_1	0	1719738	-	4b-b	21361560	23081298	-
2	69970841	70523017	691_1	0	552176	-	15a	0	552176	-
2	70523117	71085521	818_1	0	562404	+	15a	552276	1114680	+
2	71085621	72097756	619_1	0	1012135	+	15a	1114780	2126915	+
2	72097856	73778854	27_1	0	1680998	-	15a	2127015	3808013	-
2	73778954	74625917	318_1	0	846963	-	15a	3808113	4655076	-
2	74626017	84824657	45_1	33	10198673	+	15a	4655176	14853816	+
2	84824757	85836247	336_1	0	1011490	-	19	11806334	12817824	+
2	85836347	87850336	317_1	0	2013989	+	19	9792245	11806234	-
2	87850436	93259556	19_1	0	5409120	-	19	4383025	9792145	+
2	93259656	96933584	440_1	0	3673928	+	19	708997	4382925	-
2	96933684	97642581	471_1a	0	708897	+	19	0	708897	-
2	97642681	98965463	111_1	0	1322782	?	18a	0	1322782	+
2	98965563	102224460	282_2	0	3258897	?	18a	1322882	4581779	+
2	102224560	104841728	32_1	0	2617168	-	18b	4257364	6874532	+
2	104841828	108499094	11_1	0	3657266	+	18b	599998	4257264	-
2	108499194	109099092	685_1	0	599898	-	18b	0	599898	+
3	0	2332416	222_1	0	2332416	+	2i_23a-b	25036651	27369067	-
3	2332516	2973887	232_1	33	641404	-	2i_23a-b	24395180	25036551	+
3	2973987	4581603	289_1	0	1607616	+	2i_23a-b	22787464	24395080	-
3	4581703	8772160	172_1	0	4190457	-	2i_23a-b	18596907	22787364	+
3	8772260	12026868	177_1	0	3254608	+	2i_23a-b	15342199	18596807	-
3	12026968	23174092	63_1	0	11147124	+	2i_23a-b	4194975	15342099	-
3	23174192	24385714	474_1	0	1211522	+	2i_23a-b	2983353	4194875	-
3	24385814	25900638	196_1	33	1514857	-	2i_23a-b	1468429	2983253	+
3	25900738	27369067	180_1b	210607	1678936	+	2i_23a-b	0	1468329	-
3	27369167	31260636	80_2	0	3891469	-	2h_2d	0	3891469	-
3	31260736	33084133	188_1	0	1823397	+	2h_2d	3891569	5714966	+
3	33084233	33518409	597_1	0	434176	+	2h_2d	5715066	6149242	+
3	33518509	34531622	597_2	5	1013118	+	2h_2d	6149342	7162455	+
3	34531722	36959939	267_1	33	2428250	+	2h_2d	7162555	9590772	+
3	36960039	38564869	191_1	0	1604830	-	2h_2d	9590872	11195702	-
3	38564969	42230034	16_1	0	3665065	-	2h_2d	11195802	14860867	-
3	42230134	42962437	450_1	0	732303	-	2h_2d	14860967	15593270	-
3	42962537	47411819	127_1	0	4449282	+	2h_2d	15593370	20042652	+
3	47411919	47760870	510_1	0	348951	+	2h_2d	20042752	20391703	+
3	47760970	49580279	31_1	0	1819309	-	2h_2d	20391803	22211112	-
3	49580379	51176101	248_1	0	1595722	-	2h_2d	22211212	23806934	-
3	51176201	53106529	175_1	0	1930328	+	2h_2d	23807034	25737362	+
3	53106629	53720417	203_1	0	613788	+	2h_2d	25737462	26351250	+
3	53720517	55747196	229_1	0	2026679	+	2h_2d	26351350	28378029	+
3	55747296	57751843	42_1a	0	2004547	-	2h_2d	28378129	30382676	-
3	57751943	58069767	132_1	0	317824	+	2h_2d	30382776	30700600	+
3	58069867	60377535	202_2	0	2307668	+	2h_2d	30700700	33008368	+
3	60377635	60976767	623_1	0	599132	+	2h_2d	33008468	33607600	+
3	60976867	61200515	734_1	0	223648	-	2h_2d	33607700	33831348	-
3	61200615	63411235	141_1	0	2210620	-	2h_2d	33831448	36042068	-
3	63411335	67512729	136_1	0	4101394	+	2h_2d	36042168	40143562	+
3	67512829	68675078	319_1	0	1162249	+	2h_2d	40143662	41305911	+
3	68675178	70898678	368_1	0	2223500	+	2h_2d	41306011	43529511	+
3	70898778	72539574	219_2	0	1640796	-	2h_2d	43529611	45170407	-
3	72539674	72933204	219_1	0	393530	-	2h_2d	45170507	45564037	-
3	72933304	73130561	257_1	0	197257	+	2h_2d	45564137	45761394	+
3	73130661	74158790	69_1	0	1028129	-	2h_2d	45761494	46789623	-
3	74158890	74997907	297_1	33	839050	+	2h_2d	46789723	47628740	+
3	74998007	78085260	55_1	0	3087253	-	2h_2d	47628840	50716093	-
3	78085360	79957202	119_1	0	1871842	+	2h_2d	50716193	52588035	+
3	79957302	80863755	429_1	33	906486	-	2h_2d	52588135	53494588	-
3	80863855	84530070	238_3	0	3666215	-	2h_2d	53494688	57160903	-
3	84530170	89193982	273_1	0	4663812	?	21b	0	4663812	+
3	89194082	89748728	262_1	0	554646	?	21a	0	554646	-
3	89748828	91026724	275_1	0	1277896	?	21a	554746	1832642	-
3	91026824	93651942	85_1	0	2625118	?	21a	1832742	4457860	+
3	93652042	93994993	280_1	33	342984	?	21a	4457960	4800911	+
3	93995093	94205695	180_1a	0	210602	+	2i_23a-a	3062105	3272707	-
3	94205795	95492611	215_1	0	1286816	-	2i_23a-a	1775189	3062005	+
3	95492711	96401117	422_1	0	908406	-	2i_23a-a	866683	1775089	+
3	96401217	97267800	263_1a	0	866583	+	2i_23a-a	0	866583	-
3	97267900	99065126	393_1	0	1797226	?	23c	0	1797226	+
4	0	4675678	283_1	0	4675678	?	1d	0	4675678	-
4	4675778	6947056	239_1	0	2271278	?	1f	12689236	14960514	-
4	6947156	11418970	33_1	0	4471814	?	1f	8217322	12689136	-
4	11419070	13895614	242_1	0	2476544	?	1f	5740678	8217222	-
4	13895714	16415836	82_1	33	2520155	?	1f	3220456	5740578	+
4	16415936	16912709	211_1	0	496773	?	1f	2723583	3220356	+
4	16912809	19636292	127_2	0	2723483	?	1f	0	2723483	-
4	19636392	24312901	87_1	0	4676509	-	1a_30a	22100415	26776924	+
4	24313001	30137472	40_1	0	5824471	-	1a_30a	16275844	22100315	+
4	30137572	31224641	562_1	0	1087069	-	1a_30a	15188675	16275744	+
4	31224741	37884238	56_1	0	6659497	+	1a_30a	8529078	15188575	-
4	37884338	41535591	88_1	0	3651253	+	1a_30a	4877725	8528978	-
4	41535691	46413316	199_1	0	4877625	+	1a_30a	0	4877625	-
4	46413416	47534844	414_1	0	1121428	-	1b_30b	0	1121428	-
4	47534944	58586775	9_1	0	11051831	-	1b_30b	1121528	12173359	-
4	58586875	62582478	25_1	0	3995603	+	1b_30b	12173459	16169062	+
4	62582578	64905947	8_1	0	2323369	-	1b_30b	16169162	18492531	-
4	64906047	65590621	253_2	0	684574	-	1b_30b	18492631	19177205	-
4	65590721	66342005	360_1	0	751284	-	1b_30b	19177305	19928589	-
4	66342105	67601149	364_1	0	1259044	-	1b_30b	19928689	21187733	-
4	67601249	68408071	477_1	0	806822	+	1b_30b	21187833	21994655	+
4	68408171	68810135	298_1	0	401964	+	1b_30b	21994755	22396719	+
4	68810235	69295607	514_1	0	485372	-	1b_30b	22396819	22882191	-
4	69295707	70801036	205_1	0	1505329	-	1b_30b	22882291	24387620	-
4	70801136	71646704	101_1	0	845568	+	1b_30b	24387720	25233288	+
4	71646804	73520636	270_1	5	1873837	+	1b_30b	25233388	27107220	+
4	73520736	74161720	521_1	0	640984	-	1b_30b	27107320	27748304	-
4	74161820	79443534	44_1	0	5281714	+	1b_30b	27748404	33030118	+
4	79443634	81309690	71_1	33	1866089	+	1b_30b	33030218	34896274	+
4	81309790	81962488	511_1	33	652731	+	1b_30b	34896374	35549072	+
4	81962588	83569369	160_1	0	1606781	-	1b_30b	35549172	37155953	-
4	83569469	84245909	259_1	0	676440	-	1b_30b	37156053	37832493	-
4	84246009	85142566	22_2	0	896557	-	1b_30b	37832593	38729150	-
4	85142666	86169421	22_1	0	1026755	-	1b_30b	38729250	39756005	-
4	86169521	86992287	268_1	0	822766	-	1b_30b	39756105	40578871	-
4	86992387	89308149	68_1	0	2315762	+	1b_30b	40578971	42894733	+
4	89308249	89892415	439_1	0	584166	-	1b_30b	42894833	43478999	-
4	89892515	94261832	206_1	0	4369317	-	1b_30b	43479099	47848416	-
4	94261932	94472309	300_1	0	210377	-	1b_30b	47848516	48058893	-
4	94472409	97601956	17_1	0	3129547	+	1b_30b	48058993	51188540	+
4	97602056	97857068	550_1	0	255012	+	1b_30b	51188640	51443652	+
4	97857168	98384685	93_1	0	527517	+	1b_30b	51443752	51971269	+
4	98384785	99858604	432_1	33	1473852	+	1b_30b	51971369	53445188	+
4	99858704	104063275	84_1	0	4204571	-	1b_30b	53445288	57649859	-
4	104063375	104429511	603_1	0	366136	+	1b_30b	57649959	58016095	+
4	104429611	105189886	489_1	0	760275	-	1b_30b	58016195	58776470	-
4	105189986	111375434	72_2	0	6185448	-	1b_30b	58776570	64962018	-
4	111375534	116072503	52_1	0	4696969	+	1b_30b	64962118	69659087	+
4	116072603	117376066	433_1	0	1303463	-	1b_30b	69659187	70962650	-
4	117376166	118925238	61_1	0	1549072	-	1b_30b	70962750	72511822	-
5	0	8736314	14_1	0	8736314	+	2a	0	8736314	+
5	8736414	15096565	3_1	0	6360151	-	2a	8736414	15096565	-
5	15096665	15676354	693_1	0	579689	+	2a	15096665	15676354	+
5	15676454	19552763	28_1	0	3876309	+	2a	15676454	19552763	+
5	19552863	21492049	35_1	0	1939186	-	2a	19552863	21492049	-
5	21492149	28435190	98_2	0	6943041	-	2a	21492149	28435190	-
5	28435290	32567426	98_1	0	4132136	-	2a	28435290	32567426	-
5	32567526	44070190	42_1b	2004547	13507211	+	2a	32567526	44070190	+
5	44070290	44508103	97_1	0	437813	-	2a	44070290	44508103	-
5	44508203	45018724	145_1	0	510521	+	2a	44508203	45018724	+
5	45018824	49510271	187_1	27	4491474	+	2a	45018824	49510271	+
5	49510371	53079664	86_1	0	3569293	+	2a	49510371	53079664	+
5	53079764	53468467	647_1	0	388703	-	2a	53079764	53468467	-
5	53468567	54347188	388_1	0	878621	?	28e_28a	0	878621	+
5	54347288	56295777	161_1	0	1948489	?	28d_28b	0	1948489	-
5	56295877	58629091	18_1	0	2333214	?	28d_28b	1948589	4281803	+
5	58629191	64360424	109_1a	0	5731233	-	14	13297662	19028895	+
5	64360524	67456208	186_1	0	3095684	-	14	10201878	13297562	+
5	67456308	77658086	96_1	0	10201778	+	14	0	10201778	-
5	77658186	81976094	207_1	0	4317908	-	12b	0	4317908	-
5	81976194	82762862	430_1	0	786668	-	12b	4318008	5104676	-
5	82762962	93535538	7_2	0	10772576	+	12b	5104776	15877352	+
5	93535638	94385222	398_1	33	849617	+	12b	15877452	16727036	+
5	94385322	96280653	405_1	0	1895331	?	12a	5688114	7583445	-
5	96280753	97005154	504_1	0	724401	?	12a	4963613	5688014	-
5	97005254	98773982	228_1	33	1768761	?	12a	3194785	4963513	+
5	98774082	99000111	585_1	0	226029	?	12a	2968656	3194685	-
5	99000211	101168348	80_1	0	2168137	?	12a	800419	2968556	-
5	101168448	101968767	389_1	0	800319	?	12a	0	800319	+
6	0	5938887	122_1	0	5938887	+	29b	37183772	43122659	-
6	5938987	11068845	149_1	33	5129891	-	29b	32053814	37183672	+
6	11068945	12787293	110_1	33	1718381	-	29b	30335366	32053714	+
6	12787393	13352272	416_1	0	564879	+	29b	29770387	30335266	-
6	13352372	15095195	99_1	0	1742823	+	29b	28027464	29770287	-
6	15095295	18196379	144_2	0	3101084	-	29b	24926280	28027364	+
6	18196479	20194183	144_1	0	1997704	-	29b	22928476	24926180	+
6	20194283	32138299	152_2	0	11944016	-	29b	10984360	22928376	+
6	32138399	35924968	30_1	0	3786569	-	29b	7197691	10984260	+
6	35925068	36489774	580_1	0	564706	-	29b	6632885	7197591	+
6	36489874	42627066	208_1	0	6137192	+	29b	495593	6632785	-
6	42627166	43122659	247_1	0	495493	-	29b	0	495493	+
6	43122759	51894405	13_1	0	8771646	+	29c	29731588	38503234	-
6	51894505	54838439	285_1	0	2943934	+	29c	26787554	29731488	-
6	54838539	55146185	475_1	0	307646	-	29c	26479808	26787454	+
6	55146285	56293682	486_1	0	1147397	-	29c	25332311	26479708	+
6	56293782	56535084	631_1	0	241302	+	29c	25090909	25332211	-
6	56535184	58188876	102_1	0	1653692	-	29c	23437117	25090809	+
6	58188976	59104513	286_1	0	915537	-	29c	22521480	23437017	+
6	59104613	62258193	362_1	0	3153580	-	29c	19367800	22521380	+
6	62258293	66815375	15_1	0	4557082	-	29c	14810618	19367700	+
6	66815475	68977562	39_1	0	2162087	+	29c	12648431	14810518	-
6	68977662	69737464	434_1	9	759811	-	29c	11888529	12648331	+
6	69737564	70676084	70_1	0	938520	-	29c	10949909	11888429	+
6	70676184	73596679	209_1	0	2920495	-	29c	8029314	10949809	+
6	73596779	78151504	227_1	0	4554725	+	29c	3474489	8029214	-
6	78151604	81625993	399_1	0	3474389	-	29c	0	3474389	+
7	0	714868	502_2	0	714868	-	3b_3d	0	714868	-
7	714968	2011913	502_1	0	1296945	-	3b_3d	714968	2011913	-
7	2012013	3452079	47_1	0	1440066	+	3b_3d	2012013	3452079	+
7	3452179	4512414	4_1	33	1060268	+	3b_3d	3452179	4512414	+
7	4512514	10042303	237_1	0	5529789	+	3b_3d	4512514	10042303	+
7	10042403	10309475	322_1	0	267072	+	3b_3d	10042403	10309475	+
7	10309575	11434151	237_2	0	1124576	+	3b_3d	10309575	11434151	+
7	11434251	12951251	236_2	0	1517000	?	3f	0	1517000	-
7	12951351	15413840	236_1	0	2462489	?	3f	1517100	3979589	-
7	15413940	15578014	312_2	0	164074	?	3f	3979689	4143763	+
7	15578114	17292370	312_1b	254435	1968691	-	3e	71644662	73358918	+
7	17292470	17546905	312_1a	0	254435	+	3e	71390127	71644562	-
7	17547005	26215543	10_1	0	8668538	-	3e	62721489	71390027	+
7	26215643	26955196	115_1	0	739553	-	3e	61981836	62721389	+
7	26955296	27491370	541_1	0	536074	-	3e	61445662	61981736	+
7	27491470	28142906	375_1	0	651436	-	3e	60794126	61445562	+
7	28143006	30085405	150_2	0	1942399	-	3e	58851627	60794026	+
7	30085505	32510060	292_1	0	2424555	+	3e	56426972	58851527	-
7	32510160	33040153	78_1	0	529993	+	3e	55896879	56426872	-
7	33040253	47658842	78_2	0	14618589	+	3e	41278190	55896779	-
7	47658942	52035443	64_1	0	4376501	+	3e	36901589	41278090	-
7	52035543	54143825	64_2	0	2108282	+	3e	34793207	36901489	-
7	54143925	54517251	542_1a	0	373326	+	3e	34419781	34793107	-
7	54517351	54738135	542_1b	373326	594110	-	3e	34198897	34419681	+
7	54738235	58188328	1_1	0	3450093	+	3e	30748704	34198797	-
7	58188428	76515444	26_1	0	18327016	-	3e	12421588	30748604	+
7	76515544	79052090	204_1	0	2536546	-	3e	9884942	12421488	+
7	79052190	79423223	397_1	33	371066	-	3e	9513809	9884842	+
7	79423323	81292914	92_1	0	1869591	-	3e	7644118	9513709	+
7	81293014	82138532	423_1	0	845518	+	3e	6798500	7644018	-
7	82138632	88937032	29_1	0	6798400	-	3e	0	6798400	+
8	0	1560980	645_1	0	1560980	-	7a	0	1560980	-
8	1561080	6919856	173_1	0	5358776	-	7a	1561080	6919856	-
8	6919956	12471594	103_1	0	5551638	-	7a	6919956	12471594	-
8	12471694	18394449	291_2	0	5922755	-	7a	12471694	18394449	-
8	18394549	21724360	291_1	0	3329811	-	7a	18394549	21724360	-
8	21724460	23369115	400_1	0	1644655	-	7a	21724460	23369115	-
8	23369215	25622131	415_1	0	2252916	-	7a	23369215	25622131	-
8	25622231	27412892	278_1	0	1790661	-	7a	25622231	27412892	-
8	27412992	31426993	107_1	0	4014001	+	7a	27412992	31426993	+
8	31427093	32350930	447_1	0	923837	+	7a	31427093	32350930	+
8	32351030	33178289	674_1	0	827259	?	7b	0	827259	+
8	33178389	41488242	148_1	0	8309853	?	7b	827359	9137212	-
8	41488342	42105576	564_1	0	617234	?	7b	9137312	9754546	+
8	42105676	43446713	324_1	0	1341037	?	7b	9754646	11095683	-
8	43446813	47488328	50_1	0	4041515	+	13b_13a	0	4041515	+
8	47488428	47963774	57_5	0	475346	-	13b_13a	4041615	4516961	-
8	47963874	52148684	57_4	0	4184810	-	13b_13a	4517061	8701871	-
8	52148784	53692546	57_3	0	1543762	-	13b_13a	8701971	10245733	-
8	53692646	57318668	57_2	0	3626022	-	13b_13a	10245833	13871855	-
8	57318768	57483165	57_1	0	164397	-	13b_13a	13871955	14036352	-
8	57483265	62657887	139_1	0	5174622	+	13b_13a	14036452	19211074	+
8	62657987	63899423	441_1	0	1241436	+	13b_13a	19211174	20452610	+
9	0	290413	284_1	0	290413	+	5b	0	290413	+
9	290513	2098257	287_1	0	1807744	+	5b	290513	2098257	+
9	2098357	2404129	328_1b	4988666	5294438	+	5b	2098357	2404129	+
9	2404229	7392895	328_1a	0	4988666	-	5b	2404229	7392895	-
9	7392995	12146365	5_1	0	4753370	+	5b	7392995	12146365	+
9	12146465	12760161	410_1	0	613696	+	5b	12146465	12760161	+
9	12760261	13495503	498_1	33	735275	+	5b	12760261	13495503	+
9	13495603	14294437	358_1	0	798834	?	5a	4414039	5212873	-
9	14294537	18235732	202_1	0	3941195	?	5a	472744	4413939	-
9	18235832	18708476	124_1	0	472644	?	5a	0	472644	-
9	18708576	22646257	20_3	0	3937681	-	5d_20	13770619	17708300	+
9	22646357	25855363	113_1	0	3209006	+	5d_20	10561513	13770519	-
9	25855463	33134110	345_1	0	7278647	-	5d_20	3282766	10561413	+
9	33134210	33749361	589_1	0	615151	-	5d_20	2667515	3282666	+
9	33749461	36416876	90_2	0	2667415	+	5d_20	0	2667415	-
10	0	845758	58_2	0	845758	?	8a	716123	1561881	-
10	845858	1561881	496_1	0	716023	?	8a	0	716023	-
10	1561981	2596262	425_1	0	1034281	-	8b-a_8c	24782138	25816419	+
10	2596362	8565822	288_1	33	5969493	-	8b-a_8c	18812578	24782038	+
10	8565922	19461074	258_1	0	10895152	-	8b-a_8c	7917326	18812478	+
10	19461174	20809603	583_1	0	1348429	-	8b-a_8c	6568797	7917226	+
10	20809703	22526912	480_1	33	1717242	-	8b-a_8c	4851488	6568697	+
10	22527012	25064250	165_1	0	2537238	+	8b-a_8c	2314150	4851388	-
10	25064350	27378400	100_1	0	2314050	-	8b-a_8c	0	2314050	+
11	0	2011546	384_1	0	2011546	-	3c	0	2011546	-
11	2011646	9855456	250_1	0	7843810	+	3c	2011646	9855456	+
11	9855556	24398131	24_1	33	14542608	+	3c	9855556	24398131	+
11	24398231	28178602	158_2	0	3780371	-	3c	24398231	28178602	-
11	28178702	29159511	108_1	0	980809	-	3c	28178702	29159511	-
11	29159611	29583549	147_1	0	423938	+	3c	29159611	29583549	+
11	29583649	31545124	91_1	0	1961475	-	3c	29583649	31545124	-
11	31545224	32541819	444_1	0	996595	-	3c	31545224	32541819	-
11	32541919	33154834	506_1	0	612915	+	3c	32541919	33154834	+
11	33154934	33653803	142_1	0	498869	-	3c	33154934	33653803	-
12	0	629024	303_1	0	629024	-	9	0	629024	-
12	629124	1459340	164_1	0	830216	-	9	629124	1459340	-
12	1459440	2889762	183_1	0	1430322	-	9	1459440	2889762	-
12	2889862	3187392	713_1	0	297530	-	9	2889862	3187392	-
12	3187492	10093243	51_1	0	6905751	-	9	3187492	10093243	-
12	10093343	18554235	276_1	0	8460892	+	9	10093343	18554235	+
12	18554335	19549596	365_1	0	995261	+	9	18554335	19549596	+
12	19549696	21473364	485_1	0	1923668	-	9	19549696	21473364	-
12	21473464	23752357	137_1	0	2278893	+	9	21473464	23752357	+
12	23752457	24250879	171_1	0	498422	-	9	23752457	24250879	-
12	24250979	25940211	335_1	33	1689265	+	9	24250979	25940211	+
12	25940311	28527728	97_2	0	2587417	-	9	25940311	28527728	-
12	28527828	29578363	43_1	0	1050535	-	9	28527828	29578363	-
13	0	705890	306_1	0	705890	-	31	0	705890	-
13	705990	1587446	378_1	0	881456	+	31	705990	1587446	+
13	1587546	2826056	356_1	0	1238510	-	31	1587546	2826056	-
13	2826156	3078449	584_1	0	252293	+	31	2826156	3078449	+
13	3078549	3348373	197_1	0	269824	+	31	3078549	3348373	+
13	3348473	6060639	265_1	0	2712166	-	31	3348473	6060639	-
13	6060739	6660190	118_1	33	599484	+	31	6060739	6660190	+
13	6660290	7278727	158_1	0	618437	-	31	6660290	7278727	-
13	7278827	8734732	185_1	0	1455905	-	31	7278827	8734732	-
13	8734832	10840259	261_1	0	2105427	-	31	8734832	10840259	-
13	10840359	13369518	274_1	0	2529159	-	31	10840359	13369518	-
13	13369618	17402193	495_1	0	4032575	-	31	13369618	17402193	-
13	17402293	20310646	309_1	0	2908353	-	31	17402293	20310646	-
13	20310746	21362927	307_1	0	1052181	+	31	20310746	21362927	+
13	21363027	22119301	140_1	0	756274	+	31	21363027	22119301	+
13	22119401	23730878	95_1	0	1611477	-	31	22119401	23730878	-
14	0	3303603	367_1	0	3303603	+	11	0	3303603	+
14	3303703	4237591	530_1	0	933888	+	11	3303703	4237591	+
14	4237691	5747534	396_1	33	1509876	+	11	4237691	5747534	+
14	5747634	8589879	169_1	0	2842245	-	11	5747634	8589879	-
14	8589979	14562307	90_1	0	5972328	-	11	8589979	14562307	-
14	14562407	17443546	431_1	0	2881139	+	11	14562407	17443546	+
14	17443646	19468950	241_1	0	2025304	+	11	17443646	19468950	+
14	19469050	21144827	449_1	0	1675777	-	11	19469050	21144827	-
14	21144927	21717461	443_1	0	572534	-	11	21144927	21717461	-
14	21717561	22753119	94_1a	0	1035558	-	11	21717561	22753119	-
14	22753219	23292764	94_1b	1035558	1575103	+	11	22753219	23292764	+
15	0	1688145	20_1	0	1688145	?	24a	536998	2225143	-
15	1688245	2225143	20_2	0	536898	?	24a	0	536898	-
15	2225243	3741574	130_1	0	1516331	?	24b	0	1516331	-
15	3741674	5476744	315_1	0	1735070	?	24b	1516431	3251501	+
15	5476844	7532730	290_1	0	2055886	?	24b	3251601	5307487	-
16	0	3364173	21_1	0	3364173	?	26a	0	3364173	+
16	3364273	6535397	76_1	0	3171124	?	26b	0	3171124	-
17	0	2263528	448_1	0	2263528	-	22b	0	2263528	-
17	2263628	5615363	41_1	0	3351735	-	22b	2263628	5615363	-
18	0	903085	347_1	0	903085	?	27a	0	903085	-
18	903185	2521942	246_1	0	1618757	?	27a	903185	2521942	+
18	2522042	3637082	497_3	0	1115040	?	27c	0	1115040	-
18	3637182	3906550	497_2	0	269368	?	27c	1115140	1384508	-
18	3906650	4400328	244_1	0	493678	?	27c	1384608	1878286	-
NA	NA	NA	243_1	0	991787	NA	13c	0	991787	+
NA	NA	NA	352_1	0	185699	NA	13d	0	185699	+
NA	NA	NA	73_1a	0	1666522	NA	15b	0	1666522	+
NA	NA	NA	413_1	0	579636	NA	1c	0	579636	+
NA	NA	NA	74_1a	0	1903651	NA	1e	0	1903651	+
NA	NA	NA	351_1	0	347927	NA	22a	0	347927	+
NA	NA	NA	134_1	0	616177	NA	24c	0	616177	+
NA	NA	NA	329_1	0	405741	NA	25a	0	405741	-
NA	NA	NA	106_1	0	1263108	NA	25b	0	1263108	+
NA	NA	NA	391_1	0	1025926	NA	27b	0	1025926	+
NA	NA	NA	371_1	0	829258	NA	29a	0	829258	+
NA	NA	NA	342_1	0	1854119	NA	2b	0	1854119	-
NA	NA	NA	354_1	0	1634578	NA	2c	0	1634578	-
NA	NA	NA	557_1	0	227539	NA	2e	0	227539	-
NA	NA	NA	184_1	0	1873661	NA	2f	0	1873661	-
NA	NA	NA	379_1	0	844785	NA	2g	0	844785	-
NA	NA	NA	630_1	0	434242	NA	33b	0	434242	-
NA	NA	NA	294_1	0	559841	NA	33d	0	559841	+
NA	NA	NA	295_1	0	3698665	NA	33e	0	3698665	+
NA	NA	NA	390_1	0	2255604	NA	33f	0	2255604	-
NA	NA	NA	153_1	0	292560	NA	33g	0	292560	+
NA	NA	NA	390_2	0	1295742	NA	33h	0	1295742	+
NA	NA	NA	123_1	0	1132057	NA	33k	0	1132057	+
NA	NA	NA	330_1a	0	761734	NA	33l	0	761734	+
NA	NA	NA	515_1	0	868272	NA	3a	0	868272	+
NA	NA	NA	210_1	0	4120230	NA	4a	0	4120230	-
NA	NA	NA	255_1	0	1686052	NA	4c	0	1686052	+
NA	NA	NA	79_1	0	1218823	NA	4e	0	1218823	+
NA	NA	NA	124_2	0	1324844	NA	5c	0	1324844	+
NA	NA	NA	154_1	0	3342068	NA	8b-b	0	3342068	+
NA	NA	NA	622_1	0	655989	NA	8b-c	0	655989	+
NA	NA	NA	544_1	0	650423	NA	2e	227639	878062	-
NA	NA	NA	326_1	0	772736	NA	25a	405841	1178577	-
NA	NA	NA	48_1	0	4869902	NA	33b	434342	5304244	-
NA	NA	NA	413_2	0	1687053	NA	1c	579736	2266789	+
NA	NA	NA	559_1	0	570526	NA	18c	603806	1174332	+
NA	NA	NA	372_1	0	1851084	NA	23b	808496	2659580	+
NA	NA	NA	231_1	0	1178311	NA	33g	826606	2004917	-
NA	NA	NA	34_1	0	2769968	NA	2g	844885	3614853	-
NA	NA	NA	240_1	0	1557436	NA	2e	878162	2435598	-
NA	NA	NA	558_1	0	1128837	NA	18c	1174432	2303269	-
NA	NA	NA	395_1	0	1392204	NA	33h	1295842	2688046	+
NA	NA	NA	193_1	0	7456752	NA	33c	1451874	8908626	+
NA	NA	NA	333_1	0	765383	NA	2c	1634678	2400061	-
NA	NA	NA	65_1	0	4772610	NA	4c	1686152	6458762	-
NA	NA	NA	377_1	0	1022659	NA	2b	1854219	2876878	-
NA	NA	NA	143_1	0	4486499	NA	33f	2255704	6742203	-
NA	NA	NA	230_1	0	874456	NA	1c	2266889	3141345	-
NA	NA	NA	402_1	0	754087	NA	33h	2688146	3442233	+
NA	NA	NA	598_1	0	525245	NA	2b	2876978	3402223	-
NA	NA	NA	484_1	0	1465480	NA	2b	3402323	4867803	-
NA	NA	NA	343_1	0	1060081	NA	33h	3442333	4502414	-
NA	NA	NA	332_1	0	1002540	NA	2c	3988227	4990767	-
NA	NA	NA	62_1	0	2154981	NA	1c	4370845	6525826	-
NA	NA	NA	461_1	0	1225894	NA	33h	4502514	5728408	-
NA	NA	NA	321_1	0	1491697	NA	2b	4867903	6359600	+
NA	NA	NA	420_1	0	851861	NA	2e	4925854	5777715	-
NA	NA	NA	198_1	0	750929	NA	33b	5304344	6055273	-
NA	NA	NA	311_1	0	794251	NA	2e	5777815	6572066	-
NA	NA	NA	310_1	0	692960	NA	4c	6458862	7151822	+
NA	NA	NA	578_1	0	751598	NA	1c	6525926	7277524	-
NA	NA	NA	382_1	0	817391	NA	2e	6572166	7389557	+
NA	NA	NA	459_1	0	1353713	NA	33f	6742303	8096016	+
NA	NA	NA	310_2	0	506724	NA	4c	7151922	7658646	+
NA	NA	NA	349_1	0	444674	NA	1c	7277624	7722298	-
NA	NA	NA	238_1	0	743739	NA	2e	7389657	8133396	+
NA	NA	NA	36_1	0	1287386	NA	1c	7722398	9009784	+
NA	NA	NA	238_2	0	561823	NA	2e	8133496	8695319	+
NA	NA	NA	212_1	0	2969279	NA	33c	8908726	11878005	+
NA	NA	NA	435_1	0	388920	NA	33c	11878105	12267025	+
NA	NA	NA	179_1a	0	293132	NA	33c	12267125	12560257	+
NA	NA	NA	217_1	5	1229305	NA	1c	3141445	4370745	+
NA	NA	NA	252_1	33	533879	NA	33g	292660	826506	+
NA	NA	NA	116_1	33	1587999	NA	2c	2400161	3988127	+
NA	NA	NA	353_1	33	2490089	NA	2e	2435698	4925754	+
NA	NA	NA	471_1b	708897	1312603	NA	18c	0	603706	+
NA	NA	NA	330_1b	761734	2938938	NA	33k	1132157	3309361	-
NA	NA	NA	263_1b	866583	1674979	NA	23b	0	808396	+
NA	NA	NA	150_1b	1078669	2530443	NA	33c	0	1451774	+
NA	NA	NA	74_1b	1903651	2372662	NA	30c	0	469011	+
NA	NA	NA	109_1b	5731233	6783989	NA	28c	0	1052756	+
Z	0	3309435	135_1	0	3309435	-	33a	21582483	24891918	+
Z	3309535	4947676	567_2	0	1638141	-	33a	19944242	21582383	+
Z	4947776	5425501	567_1	0	477725	-	33a	19466417	19944142	+
Z	5425601	6333351	213_1	0	907750	+	33a	18558567	19466317	-
Z	6333451	7117332	272_1	0	783881	-	33a	17774586	18558467	+
Z	7117432	9890682	334_1	0	2773250	+	33a	15001236	17774486	-
Z	9890782	10197217	223_1	0	306435	+	33a	14694701	15001136	-
Z	10197317	11564745	394_1	0	1367428	+	33a	13327173	14694601	-
Z	11564845	12476319	59_1	0	911474	-	33a	12415599	13327073	+
Z	12476419	14173901	75_1	0	1697482	+	33a	10718017	12415499	-
Z	14174001	14490257	718_1	0	316256	-	33a	10401661	10717917	+
Z	14490357	15705861	178_1	0	1215504	-	33a	9186057	10401561	+
Z	15705961	17677088	156_2	0	1971127	-	33a	7214830	9185957	+
Z	17677188	21474538	156_1	0	3797350	-	33a	3417380	7214730	+
Z	21474638	22669437	195_1	0	1194799	+	33a	2222481	3417280	-
Z	22669537	24891918	194_1	0	2222381	+	33a	0	2222381	-
Z	24892018	25308710	640_1	0	416692	?	33i	12487406	12904098	-
Z	25308810	25708275	633_1	0	399465	?	33i	12087841	12487306	+
Z	25708375	26031813	438_2	0	323438	?	33i	11764303	12087741	+
Z	26031913	27039807	438_1	0	1007894	?	33i	10756309	11764203	+
Z	27039907	29570964	105_1	0	2531057	?	33i	8225152	10756209	+
Z	29571064	36717347	163_1	0	7146283	?	33i	1078769	8225052	-
Z	36717447	37796116	150_1a	0	1078669	?	33i	0	1078669	-
Z	37796216	38112886	117_1	0	316670	?	33j	0	316670	+
Z	38112986	38267525	526_1	0	154539	?	33j	316770	471309	-
Z	38267625	38554811	179_1b	293132	580318	?	33j	471409	758595	-
Z	38554911	40085931	201_1	0	1531020	?	33j	758695	2289715	+
