# Supplementary material for: Upgrading short-read animal genome assemblies to chromosome level using comparative genomics and a universal probe set
Source: Genome Res. 2017 May;27(5):875–84. doi: 10.1101/gr.213660.116 (PMC5411781; doi:10.1101/gr.213660.116)
Supplement: Supplemental Material [file supp_gr.213660.116_Supplemental_Table_S7.xlsx]

## Sheet: Pigeon
Supplemental Table S7: Pigeon chromosome assembly.
Pigeon chr	Chr start (bp)	Chr end (bp)	Scaffold ID	Scaffold start (bp)	Scaffold end (bp)	Scaffold orientation in chr	PCF ID	PCF start (bp)	PCF end (bp)	Scaffold orientation in PCF
1	0	1749379	121a	0	1749379	-	1c	58982365	60731744	+
1	1749479	2629335	384	0	879856	-	1c	58102409	58982265	+
1	2629435	3193590	137	0	564155	-	1c	57538154	58102309	+
1	3193690	3552229	883	0	358539	+	1c	57179515	57538054	-
1	3552329	5738626	40	0	2186297	+	1c	54993118	57179415	-
1	5738726	6924500	439	0	1185774	+	1c	53807244	54993018	-
1	6924600	12392002	366	0	5467402	+	1c	48339742	53807144	-
1	12392102	15935502	21	0	3543400	+	1c	44796242	48339642	-
1	15935502	18942547	13	0	3007045	-	1c	41789197	44796242	+
1	18942647	20567413	446	0	1624766	+	1c	40164331	41789097	-
1	20567513	20950393	1063	0	382880	-	1c	39781351	40164231	+
1	20950493	21210825	368	0	260332	+	1c	39520919	39781251	-
1	21210825	22086357	535	0	875532	+	1c	38645387	39520919	-
1	22086457	23441421	291	5	1354969	-	1c	37290323	38645287	+
1	23441421	24904358	81	0	1462937	+	1c	35827386	37290323	-
1	24904458	28120345	96	0	3215887	+	1c	32611399	35827286	-
1	28120345	29296351	333	0	1176006	+	1c	31435393	32611399	-
1	29296351	32139774	44	0	2843423	+	1c	28591970	31435393	-
1	32139874	32430324	431	0	290450	-	1c	28301420	28591870	+
1	32430424	33678726	19	0	1248302	+	1c	27053018	28301320	-
1	33678826	35094363	50	31	1415568	-	1c	25637381	27052918	+
1	35094363	36168331	872	0	1073968	+	1c	24563413	25637381	-
1	36168431	36541261	132	0	372830	+	1c	24190483	24563313	-
1	36541261	37223645	864	0	682384	-	1c	23508099	24190483	+
1	37223745	39250228	427	0	2026483	+	1c	21481516	23507999	-
1	39250328	39943629	89a	0	693301	-	1c	20788115	21481416	+
1	39943729	40418942	1100	0	475213	+	1c	20312802	20788015	-
1	40419042	40752931	610	0	333889	-	1c	19978813	20312702	+
1	40753031	41519799	531	0	766768	+	1c	19211945	19978713	-
1	41519899	42017605	1050	0	497706	+	1c	18714139	19211845	-
1	42017705	43256364	41	0	1238659	-	1c	17475380	18714039	+
1	43256464	43756031	755	0	499567	+	1c	16975713	17475280	-
1	43756131	46553498	297	0	2797367	+	1c	14178246	16975613	-
1	46553598	46800538	805	0	246940	+	1c	13931206	14178146	-
1	46800538	48651472	557	0	1850934	-	1c	12080272	13931206	+
1	48651572	48929389	43a	0	277817	-	1c	11802355	12080172	+
1	48929489	49421234	43b	277817	769562	-	1c	11310510	11802255	+
1	49421334	49687663	1241	0	266329	-	1c	11044081	11310410	+
1	49687763	50088381	201	31	400649	-	1c	10643363	11043981	+
1	50088381	51049441	300	0	961060	-	1c	9682303	10643363	+
1	51049541	51595274	1086	0	545733	+	1c	9136470	9682203	-
1	51595374	52793636	444	0	1198262	-	1c	7938108	9136370	+
1	52793736	53599547	974	0	805811	-	1c	7132197	7938008	+
1	53599647	54197498	528	0	597851	-	1c	6534246	7132097	+
1	54197598	54957747	106	0	760149	-	1c	5773997	6534146	+
1	54957847	56422695	287	0	1464848	+	1c	4309049	5773897	-
1	56422795	56776233	275	0	353438	+	1c	3955511	4308949	-
1	56776333	57867874	334	0	1091541	-	1c	2863870	3955411	+
1	57867974	58213585	832	0	345611	-	1c	2518159	2863770	+
1	58213685	60731744	60a	0	2518059	+	1c	0	2518059	-
1	60731844	62916383	383	0	2184539	-	1d	15467156	17651695	+
1	62916483	65729532	445	0	2813049	+	1d	12654007	15467056	-
1	65729632	66926067	126	31	1196497	-	1d	11457472	12653907	+
1	66926067	70481700	60b	2518059	6073692	-	1d	7901839	11457472	+
1	70481800	72441617	470	0	1959817	+	1d	5941922	7901739	-
1	72441717	72979479	665	31	537793	-	1d	5404060	5941822	+
1	72979479	73765657	131	0	786178	+	1d	4617882	5404060	-
1	73765757	74704356	336	0	938599	+	1d	3679183	4617782	-
1	74704456	75040363	533	0	335907	-	1d	3343176	3679083	+
1	75040463	77890369	246	0	2849906	+	1d	493170	3343076	-
1	77890369	78383539	358	0	493170	+	1d	0	493170	-
1	78383639	80959671	220	0	2576032	-	1f	0	2576032	-
1	80959671	94740715	31	0	13781104	-	1f	2576032	16357076	-
1	94740715	95055868	225	0	315153	-	1f	16357076	16672229	-
1	95055868	95472952	617	31	417115	+	1f	16672229	17089313	+
1	95472952	96581547	651	0	1108595	-	1f	17089313	18197908	-
1	96581647	97035299	84	0	453652	-	1f	18198008	18651660	-
1	97035299	97930047	492	0	894748	-	1f	18651660	19546408	-
1	97930147	99113682	425	0	1183535	+	1f	19546508	20730043	+
1	99113682	99736142	681	5	622465	+	1f	20730043	21352503	+
1	99736242	102185290	124	0	2449048	-	1f	21352603	23801651	-
1	102185290	103227372	233	31	1042113	+	1f	23801651	24843733	+
1	103227472	104228958	542	0	1001486	-	1f	24843833	25845319	-
1	104229058	106448329	302	0	2219271	+	1f	25845419	28064690	+
1	106448429	111036808	68a	0	4588379	-	1f	28064790	32653169	-
1	111036908	111235119	75	0	198211	+	1f	32653269	32851480	+
1	111235219	111956868	1018	0	721649	-	1f	32851580	33573229	-
1	111956968	134269627	101b	1317717	23630376	+	1f	33573329	55885988	+
1	134269627	135719204	250	0	1449577	-	1f	55885988	57335565	-
1	135719304	137462847	471	0	1743543	+	1f	57335665	59079208	+
1	137462847	137696229	981	0	233382	-	1f	59079208	59312590	-
1	137696329	140420949	160	0	2724620	?	1g	0	2724620	-
1	140420949	141775647	214	0	1354698	?	1g	2724620	4079318	-
1	141775647	142447233	29	31	671617	?	1g	4079318	4750904	+
1	142447233	143745395	197	5	1298167	?	1g	4750904	6049066	+
1	143745495	146248469	245	31	2503005	-	1i	55817417	58320391	+
1	146248469	146725221	428	0	476752	-	1i	55340665	55817417	+
1	146725321	146911138	549	0	185817	+	1i	55154748	55340565	-
1	146911238	147728132	743	0	816894	-	1i	54337754	55154648	+
1	147728232	149049731	167	31	1321530	-	1i	53016155	54337654	+
1	149049731	152948925	183	0	3899194	+	1i	49116961	53016155	-
1	152948925	154288737	219	0	1339812	-	1i	47777149	49116961	+
1	154288837	155254163	627	0	965326	+	1i	46811723	47777049	-
1	155254263	155916822	558	0	662559	+	1i	46149064	46811623	-
1	155916922	156655570	61	0	738648	-	1i	45410316	46148964	+
1	156655670	157774509	224	31	1118870	-	1i	44291377	45410216	+
1	157774509	157968196	690	31	193718	-	1i	44097690	44291377	+
1	157968196	158977116	373	0	1008920	-	1i	43088770	44097690	+
1	158977216	177189367	17	0	18212151	+	1i	24876519	43088670	-
1	177189467	178741586	574	0	1552119	+	1i	23324300	24876419	-
1	178741686	189597361	59	0	10855675	+	1i	12468525	23324200	-
1	189597461	192143262	155	0	2545801	+	1i	9922624	12468425	-
1	192143362	194645596	599	0	2502234	-	1i	7420290	9922524	+
1	194645696	196857826	461	0	2212130	+	1i	5208060	7420190	-
1	196857926	202065886	10	0	5207960	+	1i	0	5207960	-
2	0	2574502	517	0	2574502	?	2a	0	2574502	-
2	2574502	4024842	450	31	1450371	?	2a	2574502	4024842	+
2	4024942	4252198	530	0	227256	-	2b	25314982	25542238	+
2	4252298	4826293	370	0	573995	-	2b	24740887	25314882	+
2	4826393	6891228	493	0	2064835	-	2b	22675952	24740787	+
2	6891328	7116011	1017	0	224683	-	2b	22451169	22675852	+
2	7116111	7335675	1636	0	219564	-	2b	22231505	22451069	+
2	7335775	9145782	82	0	1810007	+	2b	20421398	22231405	-
2	9145782	10069352	337	0	923570	+	2b	19497828	20421398	-
2	10069452	11903037	30	0	1833585	+	2b	17664143	19497728	-
2	11903137	16734663	122	0	4831526	+	2b	12832517	17664043	-
2	16734763	17376512	814	0	641749	+	2b	12190668	12832417	-
2	17376512	18805528	74	31	1429047	-	2b	10761652	12190668	+
2	18805528	20659717	536	0	1854189	+	2b	8907463	10761652	-
2	20659717	21067739	313	0	408022	-	2b	8499441	8907463	+
2	21067839	26446254	169	31	5378446	-	2b	3120926	8499341	+
2	26446254	27906249	766	0	1459995	+	2b	1660931	3120926	-
2	27906249	29567180	604	0	1660931	-	2b	0	1660931	+
2	29567280	32720931	486	0	3153651	?	2d	199500	3353151	+
2	32721031	32920431	671	0	199400	?	2d	0	199400	+
2	32920531	36134541	37	0	3214010	?	2f	0	3214010	+
2	36134641	37006665	487	0	872024	?	2j	0	872024	+
2	37006765	37891587	403b	2500945	3385767	?	2q	16327457	17212279	+
2	37891687	39542025	418	0	1650338	?	2q	14677019	16327357	-
2	39542125	42233006	196	0	2690881	?	2q	11986038	14676919	+
2	42233106	47685865	565	0	5452759	?	2q	6533179	11985938	-
2	47685865	50086858	230	0	2400993	?	2q	4132186	6533179	-
2	50086958	50821558	421	31	734631	?	2q	3397486	4132086	+
2	50821558	54219044	67	0	3397486	?	2q	0	3397486	-
2	54219144	54955876	416	31	736763	-	2r	80826087	81562819	+
2	54955876	56985395	409	0	2029519	+	2r	78796568	80826087	-
2	56985495	58703693	15	0	1718198	+	2r	77078270	78796468	-
2	58703793	59073823	2	0	370030	+	2r	76708140	77078170	-
2	59073923	59318812	878	0	244889	-	2r	76463151	76708040	+
2	59318912	61903202	97	0	2584290	+	2r	73878761	76463051	-
2	61903302	62177924	1192	0	274622	+	2r	73604039	73878661	-
2	62177924	62536503	371	0	358579	-	2r	73245460	73604039	+
2	62536603	62997078	361	0	460475	+	2r	72784885	73245360	-
2	62997178	64023354	707	0	1026176	+	2r	71758609	72784785	-
2	64023354	66303687	267	0	2280333	+	2r	69478276	71758609	-
2	66303687	67073539	222	0	769852	-	2r	68708424	69478276	+
2	67073639	67386024	1088	31	312416	-	2r	68395939	68708324	+
2	67386024	68134090	231	0	748066	+	2r	67647873	68395939	-
2	68134190	69297752	738	0	1163562	-	2r	66484211	67647773	+
2	69297852	69542568	973	0	244716	-	2r	66239395	66484111	+
2	69542668	71713781	415	0	2171113	+	2r	64068182	66239295	-
2	71713781	72708342	45	0	994561	+	2r	63073621	64068182	-
2	72708442	73336998	332	0	628556	-	2r	62444965	63073521	+
2	73337098	74114916	401	31	777849	-	2r	61667047	62444865	+
2	74114916	78874901	173	0	4759985	+	2r	56907062	61667047	-
2	78874901	80283925	35	0	1409024	+	2r	55498038	56907062	-
2	80283925	81117830	483	0	833905	-	2r	54664133	55498038	+
2	81117930	82853032	774	0	1735102	+	2r	52928931	54664033	-
2	82853132	84913504	312	0	2060372	+	2r	50868459	52928831	-
2	84913504	85119311	1187	0	205807	-	2r	50662652	50868459	+
2	85119411	86308172	42	0	1188761	-	2r	49473791	50662552	+
2	86308272	87148980	692	0	840708	+	2r	48632983	49473691	-
2	87148980	88253032	23	0	1104052	+	2r	47528931	48632983	-
2	88253032	90509769	524	0	2256737	-	2r	45272194	47528931	+
2	90509869	91065685	473	0	555816	+	2r	44716278	45272094	-
2	91065685	91748549	158	0	682864	+	2r	44033414	44716278	-
2	91748549	93224759	205	0	1476210	-	2r	42557204	44033414	+
2	93224859	93708995	117	0	484136	+	2r	42072968	42557104	-
2	93708995	94755714	140	0	1046719	+	2r	41026249	42072968	-
2	94755814	95592976	200	0	837162	-	2r	40188987	41026149	+
2	95593076	101084278	195	0	5491202	-	2r	34697685	40188887	+
2	101084378	101841161	55	0	756783	-	2r	33940802	34697585	+
2	101841261	102505715	98	31	664485	-	2r	33276248	33940702	+
2	102505715	103631007	442	0	1125292	+	2r	32150956	33276248	-
2	103631007	106223164	320	31	2592188	-	2r	29558799	32150956	+
2	106223164	106887101	791	0	663937	+	2r	28894862	29558799	-
2	106887101	115848341	1	0	8961240	-	2r	19933622	28894862	+
2	115848441	116223310	775	31	374900	-	2r	19558653	19933522	+
2	116223310	117317475	472	0	1094165	+	2r	18464488	19558653	-
2	117317475	117843016	271	0	525541	+	2r	17938947	18464488	-
2	117843016	126071314	216	0	8228298	+	2r	9710649	17938947	-
2	126071414	131991096	419	0	5919682	+	2r	3790867	9710549	-
2	131991196	132334869	608	0	343673	+	2r	3447094	3790767	-
2	132334869	132672435	174	0	337566	-	2r	3109528	3447094	+
2	132672535	133455614	294	0	783079	-	2r	2326349	3109428	+
2	133455714	134095223	602	0	639509	+	2r	1686740	2326249	-
2	134095323	134323275	1003	0	227952	+	2r	1458688	1686640	-
2	134323375	134886775	452	0	563400	+	2r	895188	1458588	-
2	134886775	135109218	751	31	222474	-	2r	672745	895188	+
2	135109218	135781963	154	0	672745	+	2r	0	672745	-
3	0	1871296	628	0	1871296	-	3a	8877660	10748956	+
3	1871396	4143191	274	0	2271795	-	3a	6605765	8877560	+
3	4143291	4977765	1305	0	834474	+	3a	5771191	6605665	-
3	4977865	7100556	490	0	2122691	-	3a	3648400	5771091	+
3	7100656	7844167	178	0	743511	-	3a	2904789	3648300	+
3	7844267	9646418	190	0	1802151	-	3a	1102538	2904689	+
3	9646518	10748956	135	0	1102438	+	3a	0	1102438	-
3	10749056	11577335	276	31	828341	-	3d	99701060	100529339	+
3	11577335	12895052	101a	0	1317717	+	3d	98383343	99701060	-
3	12895152	14856840	54	31	1961719	-	3d	96421555	98383243	+
3	14856840	15650496	440	0	793656	-	3d	95627899	96421555	+
3	15650596	16924890	108	0	1274294	+	3d	94353505	95627799	-
3	16924990	17308357	742	0	383367	-	3d	93970038	94353405	+
3	17308457	18898770	618	0	1590313	+	3d	92379625	93969938	-
3	18898870	20382146	538	0	1483276	+	3d	90896249	92379525	-
3	20382246	21333625	264	0	951379	-	3d	89944770	90896149	+
3	21333725	22005000	498	0	671275	+	3d	89273395	89944670	-
3	22005000	22283840	210	0	278840	+	3d	88994555	89273395	-
3	22283940	29640523	109	0	7356583	-	3d	81637872	88994455	+
3	29640623	29851610	242	0	210987	+	3d	81426785	81637772	-
3	29851710	42310042	232	0	12458332	-	3d	68968353	81426685	+
3	42310142	51712838	237	0	9402696	+	3d	59565557	68968253	-
3	51712938	55951787	363	0	4238849	-	3d	55326608	59565457	+
3	55951887	62506722	235	0	6554835	+	3d	48771673	55326508	-
3	62506822	65142743	429	0	2635921	-	3d	46135652	48771573	+
3	65142843	68743448	378	0	3600605	-	3d	42534947	46135552	+
3	68743548	68997702	1136	0	254154	+	3d	42280693	42534847	-
3	68997702	69422784	997	31	425113	-	3d	41855611	42280693	+
3	69422784	70231088	456	0	808304	-	3d	41047307	41855611	+
3	70231188	72236105	92	0	2004917	+	3d	39042290	41047207	-
3	72236105	72771036	1299	0	534931	+	3d	38507359	39042290	-
3	72771036	73523696	285	0	752660	+	3d	37754699	38507359	-
3	73523796	74890862	99	0	1367066	+	3d	36387533	37754599	-
3	74890962	76607428	46	31	1716497	-	3d	34670967	36387433	+
3	76607428	102273623	102	0	25666195	+	3d	9004772	34670967	-
3	102273723	102479591	672	0	205868	+	3d	8798804	9004672	-
3	102479691	105628429	413	0	3148738	-	3d	5649966	8798704	+
3	105628529	105939002	449	0	310473	+	3d	5339393	5649866	-
3	105939102	107193037	589	0	1253935	+	3d	4085358	5339293	-
3	107193037	108508113	273	31	1315107	-	3d	2770282	4085358	+
3	108508113	108805431	386	0	297318	+	3d	2472964	2770282	-
3	108805531	109628973	175	31	823473	-	3d	1649422	2472864	+
3	109628973	110592618	76	0	963645	+	3d	685777	1649422	-
3	110592718	111278395	466	0	685677	+	3d	0	685677	-
4	0	3263358	28	0	3263358	?	4n	0	3263358	+
4	3263458	4213707	164	0	950249	?	4n	3263458	4213707	+
4	4213807	5949963	229	0	1736156	?	4m	11794021	13530177	+
4	5950063	6169577	1009	0	219514	?	4m	11574407	11793921	-
4	6169677	8806023	478	0	2636346	?	4m	8937961	11574307	+
4	8806123	14783815	942	0	5977692	?	4m	2960169	8937861	-
4	14783915	17743984	3	0	2960069	?	4m	0	2960069	-
4	17744084	18013949	1048	0	269865	?	4k	0	269865	+
4	18014049	20515033	62	0	2500984	?	4k	269965	2770949	-
4	20515033	24721058	47	0	4206025	?	4k	2770949	6976974	-
4	24721058	26239037	351	31	1518041	?	4k	6976974	8494953	+
4	26239137	26657489	637	0	418352	?	4k	8495053	8913405	-
4	26657589	29316806	58	0	2659217	+	4p	0	2659217	+
4	29316906	48480708	38	0	19163802	+	4p	2659317	21823119	+
4	48480708	53150892	5	31	4670215	+	4p	21823119	26493303	+
4	53150992	57012649	379	0	3861657	+	4p	26493403	30355060	+
4	57012749	59530348	203	0	2517599	+	4p	30355160	32872759	+
4	59530448	60167318	341	0	636870	+	4p	32872859	33509729	+
4	60167418	61434859	495	0	1267441	?	4q	0	1267441	-
4	61434959	61650250	752	0	215291	?	4q	1267541	1482832	+
4	61650350	61967514	677	0	317164	?	4q	1482932	1800096	+
4	61967614	63605538	63	0	1637924	?	4q	1800196	3438120	-
4	63605538	64937463	193	31	1331956	?	4q	3438120	4770045	+
5	0	3084941	503	0	3084941	+	5c	0	3084941	+
5	3085041	16105975	16	0	13020934	-	5c	3085041	16105975	-
5	16106075	18253334	346	0	2147259	-	5c	16106075	18253334	-
5	18253434	22960813	56	0	4707379	?	5d	0	4707379	+
5	22960813	45578728	34	10	22617935	?	5d	4707379	27325294	+
5	45578828	46179817	184	31	601020	?	5g	984889	1585878	+
5	46179817	47164706	369	0	984889	?	5g	0	984889	-
6	0	279397	1348	0	279397	-	7a	0	279397	-
6	279497	1149899	385	0	870402	-	7a	279497	1149899	-
6	1149999	1679983	725	0	529984	-	7a	1149999	1679983	-
6	1680083	8721276	68b	4588379	11629572	+	7a	1680083	8721276	+
6	8721376	9185663	711	0	464287	-	7a	8721376	9185663	-
6	9185763	9774578	159	0	588815	+	7a	9185763	9774578	+
6	9774678	10784513	128b	2079528	3089363	?	7c-b	0	1009835	+
6	10784613	11026405	1095	0	241792	+	7d	0	241792	+
6	11026405	11767507	726	0	741102	-	7d	241792	982894	-
6	11767607	12664311	147	0	896704	+	7d	982994	1879698	+
6	12664411	14048719	893	0	1384308	+	7d	1879798	3264106	+
6	14048819	14337897	469	0	289078	+	7d	3264206	3553284	+
6	14337897	14801553	551	31	463687	+	7d	3553284	4016940	+
6	14801653	21395347	32	0	6593694	-	7d	4017040	10610734	-
6	21395347	21948959	523	31	553643	+	7d	10610734	11164346	+
6	21949059	22147986	717	0	198927	+	7d	11164446	11363373	+
6	22147986	22715789	773	31	567834	+	7d	11363373	11931176	+
6	22715789	25576497	603	0	2860708	-	7d	11931176	14791884	-
6	25576497	28423148	179	31	2846682	+	7d	14791884	17638535	+
6	28423248	32578393	327	0	4155145	+	7d	17638635	21793780	+
6	32578493	33500823	168	0	922330	+	7d	21793880	22716210	+
6	33500923	36651012	27	0	3150089	+	7d	22716310	25866399	+
7	0	840829	645	0	840829	?	6a	0	840829	+
7	840929	1342269	260	0	501340	?	6a	840929	1342269	-
7	1342269	1756147	527	31	413909	?	6a	1342269	1756147	+
7	1756147	3767850	24	0	2011734	?	6a	1756147	3767850	-
7	3767850	5250055	399	31	1482236	?	6a	3767850	5250055	+
7	5250155	6248444	622	0	998289	+	6b	26597294	27595583	-
7	6248444	6920553	569	0	672109	+	6b	25925185	26597294	-
7	6920653	12712555	64	0	5791902	-	6b	20133183	25925085	+
7	12712655	14363214	18	0	1650559	+	6b	18482524	20133083	-
7	14363214	15591007	112	0	1227793	+	6b	17254731	18482524	-
7	15591107	19093225	262	0	3502118	+	6b	13752513	17254631	-
7	19093325	22547748	314	0	3454423	+	6b	10297990	13752413	-
7	22547848	23910292	191	0	1362444	+	6b	8935446	10297890	-
7	23910292	26592550	299	0	2682258	-	6b	6253188	8935446	+
7	26592650	26809833	189	0	217183	+	6b	6035905	6253088	-
7	26809833	27378613	1256	0	568780	+	6b	5467125	6035905	-
7	27378713	30540521	153	0	3161808	+	6b	2305217	5467025	-
7	30540521	30915325	326	0	374804	+	6b	1930413	2305217	-
7	30915425	31472579	423	0	557154	+	6b	1373159	1930313	-
7	31472679	32016785	865	0	544106	-	6b	828953	1373059	+
7	32016885	32439533	394	0	422648	+	6b	406205	828853	-
7	32439633	32845738	1221	0	406105	+	6b	0	406105	-
8	0	2705470	309	0	2705470	-	8a	0	2705470	-
8	2705470	3991231	269	31	1285792	+	8a	2705470	3991231	+
8	3991331	22174021	7	0	18182690	+	8a	3991331	22174021	+
8	22174121	27337790	87b	1938386	7102055	?	8b	0	5163669	-
8	27337890	30029501	510	0	2691611	?	8b	5163769	7855380	+
9	0	348883	484	0	348883	?	9c	12320806	12669689	-
9	348983	2324579	258	0	1975596	?	9c	10345110	12320706	-
9	2324679	2652717	266	0	328038	?	9c	10016972	10345010	-
9	2652717	2929395	772	0	276678	?	9c	9740294	10016972	-
9	2929495	3604305	691	0	674810	?	9c	9065384	9740194	-
9	3604305	7560283	698	0	3955978	?	9c	5109406	9065384	+
9	7560383	11447034	244	0	3886651	?	9c	1222655	5109306	+
9	11447134	12669689	597	0	1222555	?	9c	0	1222555	-
9	12669789	13211515	560	0	541726	?	9a	0	541726	-
9	13211515	16820961	217	0	3609446	?	9a	541726	4151172	-
9	16821061	18059508	716	0	1238447	?	9a	4151272	5389719	+
9	18059608	21896583	80	0	3836975	?	9a	5389819	9226794	+
9	21896583	22375840	676	29	479286	?	9a	9226794	9706051	+
10	0	992132	1439	0	992132	+	10b	0	992132	+
10	992232	2930618	87a	0	1938386	+	10b	992232	2930618	+
10	2930718	8285844	506	0	5355126	+	10b	2930718	8285844	+
10	8285944	9073660	89b	693301	1481017	-	10b	8285944	9073660	-
10	9073760	9545624	767	0	471864	-	10b	9073760	9545624	-
10	9545724	10638159	891	0	1092435	-	10b	9545724	10638159	-
10	10638159	11919996	1325	31	1281868	+	10b	10638159	11919996	+
10	11920096	15069703	150	0	3149607	-	10b	11920096	15069703	-
10	15069703	15712824	836	0	643121	-	10b	15069703	15712824	-
10	15712824	16144226	815	31	431433	+	10b	15712824	16144226	+
10	16144326	16798121	702	0	653795	-	10b	16144326	16798121	-
10	16798121	18401420	436	31	1603330	+	10b	16798121	18401420	+
10	18401520	19326846	624	0	925326	+	10b	18401520	19326846	+
11	0	11860022	123	0	11860022	+	11	0	11860022	+
11	11860122	13401002	669	0	1540880	+	11	11860122	13401002	+
11	13401102	17917510	863	0	4516408	+	11	13401102	17917510	+
11	17917610	20992093	256	0	3074483	+	11	17917610	20992093	+
12	0	1612906	88	31	1612937	?	12b	659100	2272006	+
12	1612906	1925371	581	0	312465	?	12b	346635	659100	+
12	1925471	2272006	913	0	346535	?	12b	0	346535	+
12	2272106	3658242	1373	0	1386136	?	12c	13378498	14764634	+
12	3658342	4323839	448	0	665497	?	12c	12712901	13378398	-
12	4323939	8134644	277	0	3810705	?	12c	8902096	12712801	-
12	8134644	8857031	410	0	722387	?	12c	8179709	8902096	-
12	8857031	10189191	481	31	1332191	?	12c	6847549	8179709	+
12	10189191	11464884	213	0	1275693	?	12c	5571856	6847549	+
12	11464984	12404434	1093	0	939450	?	12c	4632306	5571756	+
12	12404534	13555112	103	31	1150609	?	12c	3481628	4632206	+
12	13555112	14697720	347	0	1142608	?	12c	2339020	3481628	-
12	14697820	15508796	532	0	810976	?	12c	1527944	2338920	+
12	15508896	17036740	362	0	1527844	?	12c	0	1527844	-
13	0	16759274	79	0	16759274	-	13	0	16759274	-
13	16759274	17824134	395	31	1064891	+	13	16759274	17824134	+
13	17824134	19529340	636	31	1705299	+	13	17824134	19529340	+
14	0	371935	306a	0	371935	-	14b-b	0	371935	-
14	372035	4105790	209	0	3733755	+	14b-b	372035	4105790	+
14	4105890	4513512	372a	31	407653	+	14b-b	4105890	4513512	+
14	4513612	9285851	146	0	4772239	+	14b-b	4513612	9285851	+
14	9285951	10494316	1084	0	1208365	-	14b-b	9285951	10494316	-
15	0	906123	1320	0	906123	?	15a	7699506	8605629	-
15	906123	8605629	20	0	7699506	?	15a	0	7699506	-
15	8605729	10224357	143	0	1618628	?	15b	0	1618628	+
15	10224357	10490374	737	0	266017	?	15b	1618628	1884645	-
15	10490374	11431155	70	31	940843	?	15b	1884645	2825426	+
15	11431255	14101563	95	0	2670308	?	15b	2825526	5495834	+
17	0	239704	735	0	239704	+	17	0	239704	+
17	239804	440764	1106	0	200960	-	17	239804	440764	-
17	440864	1313160	568	0	872296	-	17	440864	1313160	-
17	1313260	1644720	539	0	331460	+	17	1313260	1644720	+
17	1644820	2240809	1281	0	595989	-	17	1644820	2240809	-
17	2240909	4647945	26	0	2407036	-	17	2240909	4647945	-
17	4647945	5019691	955	0	371746	-	17	4647945	5019691	-
17	5019791	6094583	835	0	1074792	+	17	5019791	6094583	+
17	6094683	8962147	642	0	2867464	+	17	6094683	8962147	+
17	8962147	10772630	686	0	1810483	-	17	8962147	10772630	-
18	0	5910799	111	0	5910799	-	18c	0	5910799	-
18	5910899	6161829	316	0	250930	+	18c	5910899	6161829	+
18	6161929	6593253	753	0	431324	-	18c	6161929	6593253	-
18	6593353	8441930	577	0	1848577	-	18c	6593353	8441930	-
18	8442030	9343545	331	0	901515	+	18c	8442030	9343545	+
19	0	2114730	130	0	2114730	-	19b	0	2114730	-
19	2114830	3141579	580	0	1026749	+	19b	2114830	3141579	+
19	3141579	7459857	94	0	4318278	-	19b	3141579	7459857	-
19	7459957	8983367	115	0	1523410	-	19b	7459957	8983367	-
20	0	457456	958	0	457456	?	20a	0	457456	+
20	457556	1261728	595	0	804172	?	20a	457556	1261728	-
20	1261828	9443883	36	0	8182055	?	20e	0	8182055	+
21	0	4540010	693	0	4540010	-	21a	0	4540010	-
21	4540010	5814544	307	31	1274627	+	21a	4540010	5814544	+
22	0	494110	187	0	494110	+	22	0	494110	+
22	494210	1114365	740b	986408	1606563	+	22	494210	1114365	+
22	1114465	2100873	740a	0	986408	-	22	1114465	2100873	-
22	2100973	3913090	497	0	1812117	+	22	2100973	3913090	+
23	0	924549	73	0	924549	?	23a	0	924549	-
23	924649	1549044	749	0	624395	?	23b	4121783	4746178	-
23	1549144	1789134	684	0	239990	?	23b	3881693	4121683	-
23	1789234	1996121	1534	0	206887	?	23b	3674706	3881593	+
23	1996221	5670827	391	0	3674606	?	23b	0	3674606	-
24	0	2320313	367	0	2320313	?	24a	1406413	3726726	-
24	2320413	2923409	455	0	602996	?	24a	803317	1406313	-
24	2923509	3726726	338	0	803217	?	24a	0	803217	-
24	3726826	5930902	77	0	2204076	?	24b	0	2204076	-
25	0	244007	404	0	244007	+	25	0	244007	+
25	244107	508517	683	0	264410	+	25	244107	508517	+
25	508617	765080	1246	0	256463	-	25	508617	765080	-
26	0	547449	1590	0	547449	?	26b	0	547449	+
26	547549	2737347	454b	702229	2892027	?	26b	547549	2737347	-
26	2737447	3393753	799	0	656306	?	26d	0	656306	+
27	0	486350	318	0	486350	?	27a	0	486350	+
27	486450	2946395	265	0	2459945	?	27a	486450	2946395	+
27	2946495	3171603	800	0	225108	?	27a	2946495	3171603	+
27	3171703	3527300	748	0	355597	?	27a	3171703	3527300	+
27	3527400	4681961	768	0	1154561	?	27a	3527400	4681961	-
27	4682061	4918377	1769	0	236316	?	27b	0	236316	+
28	0	1542383	194	0	1542383	+	28c	0	1542383	+
4A	0	953542	14	0	953542	+	4f	5086832	6040374	-
4A	953642	2273452	647	0	1319810	+	4f	3766922	5086732	-
4A	2273552	3479911	575b	359548	1565907	+	4f	2560463	3766822	-
4A	3480011	4922223	372b	407653	1849865	+	4f	1118151	2560363	-
4A	4922323	6040374	142b	3927999	5046050	+	4f	0	1118051	-
4A	6040474	7434983	69	0	1394509	+	4c	0	1394509	+
4A	7435083	9257969	295	0	1822886	-	4c	1394609	3217495	-
4A	9257969	10306810	620	31	1048903	+	4c	3217495	4266336	+
4A	10306910	15045648	72	0	4738738	+	4c	4266436	9005174	+
Z	0	2345414	278	0	2345414	?	34c	0	2345414	-
Z	2345514	3327380	227	0	981866	?	34c	2345514	3327380	+
Z	3327480	4029409	590	0	701929	?	34c	3327480	4029409	-
Z	4029509	5159461	319	0	1129952	?	34c	4029509	5159461	-
Z	5159561	6467043	282	0	1307482	?	34c	5159561	6467043	+
Z	6467143	8986562	129	0	2519419	?	34c	6467143	8986562	+
Z	8986662	12916805	51	0	3930143	?	34c	8986662	12916805	+
Z	12916805	13450990	376	5	534190	?	34c	12916805	13450990	+
Z	13451090	14027221	162b	427728	1003859	+	34e	0	576131	+
Z	14027321	14608715	356	0	581394	-	34e	576231	1157625	-
Z	14608815	15036543	162a	0	427728	-	34e	1157725	1585453	-
Z	15036643	15336572	941	0	299929	+	34e	1585553	1885482	+
Z	15336672	16922654	33	0	1585982	-	34e	1885582	3471564	-
Z	16922754	17188062	1644	0	265308	+	34e	3471664	3736972	+
Z	17188162	20684921	93	0	3496759	-	34e	3737072	7233831	-
Z	20685021	21030249	482	0	345228	-	34e	7233931	7579159	-
Z	21030349	21739348	593	0	708999	+	34e	7579259	8288258	+
Z	21739448	24049322	226	0	2309874	-	34e	8288358	10598232	-
Z	24049422	25356484	317	0	1307062	+	34e	10598332	11905394	+
Z	25356584	25908276	432	0	551692	+	34e	11905494	12457186	+
Z	25908376	27739314	199	0	1830938	+	34e	12457286	14288224	+
Z	27739414	27974358	411	0	234944	+	34e	14288324	14523268	+
Z	27974458	28527922	311	0	553464	+	34e	14523368	15076832	+
Z	28527922	29774671	148	0	1246749	-	34e	15076832	16323581	-
Z	29774771	34632268	6	0	4857497	-	34e	16323681	21181178	-
Z	34632368	34921635	186	0	289267	-	34e	21181278	21470545	-
Z	34921735	36673812	120	0	1752077	-	34e	21470645	23222722	-
Z	36673912	37992293	301	0	1318381	-	34e	23222822	24541203	-
NA	NA	NA	381	0	585442	NA	10a	0	585442	-
NA	NA	NA	335a	0	1287642	NA	12a	0	1287642	-
NA	NA	NA	251	0	1226462	NA	14a	0	1226462	+
NA	NA	NA	591	0	199573	NA	18a	0	199573	-
NA	NA	NA	1309	0	516205	NA	18b	0	516205	+
NA	NA	NA	540	0	458830	NA	19a	0	458830	-
NA	NA	NA	402	0	1498024	NA	1e	0	1498024	-
NA	NA	NA	459	0	420372	NA	1h	0	420372	+
NA	NA	NA	257	0	585698	NA	1j	0	585698	+
NA	NA	NA	1248	0	188091	NA	20b	0	188091	+
NA	NA	NA	902	0	230567	NA	20c	0	230567	+
NA	NA	NA	1331	0	373498	NA	20d-a	0	373498	+
NA	NA	NA	100a	0	1138080	NA	20d-b	0	1138080	-
NA	NA	NA	612	0	858845	NA	21b	0	858845	+
NA	NA	NA	869	0	617714	NA	21c	0	617714	+
NA	NA	NA	934	0	168465	NA	23c	0	168465	+
NA	NA	NA	176	0	1709353	NA	26a	0	1709353	+
NA	NA	NA	454a	0	702229	NA	26c	0	702229	+
NA	NA	NA	842	0	273726	NA	28a	0	273726	-
NA	NA	NA	544	0	341646	NA	28b	0	341646	+
NA	NA	NA	393	0	788540	NA	28d	0	788540	+
NA	NA	NA	170	0	598539	NA	2c	0	598539	+
NA	NA	NA	142a	0	3927999	NA	2e	0	3927999	-
NA	NA	NA	763	0	525639	NA	2g	0	525639	+
NA	NA	NA	204	0	1103049	NA	2h	0	1103049	-
NA	NA	NA	611	0	217625	NA	2i	0	217625	+
NA	NA	NA	272	0	1149763	NA	2k	0	1149763	-
NA	NA	NA	110	0	1699330	NA	2l	0	1699330	-
NA	NA	NA	66	0	2067911	NA	2m	0	2067911	+
NA	NA	NA	2448	0	546770	NA	2n	0	546770	-
NA	NA	NA	403a	0	2500945	NA	2p	0	2500945	+
NA	NA	NA	113	0	1357519	NA	34a	0	1357519	-
NA	NA	NA	1361	0	221085	NA	34b	0	221085	+
NA	NA	NA	249	0	1886852	NA	34d	0	1886852	-
NA	NA	NA	1397	0	232402	NA	34f	0	232402	+
NA	NA	NA	254	0	1491340	NA	34g	0	1491340	+
NA	NA	NA	546	0	205752	NA	34h	0	205752	-
NA	NA	NA	724	0	1044949	NA	34i	0	1044949	+
NA	NA	NA	840	0	704022	NA	34j	0	704022	+
NA	NA	NA	761	0	897650	NA	34k	0	897650	+
NA	NA	NA	25	0	1158700	NA	3b	0	1158700	-
NA	NA	NA	71	0	1078613	NA	3c	0	1078613	+
NA	NA	NA	342	0	468394	NA	3e	0	468394	-
NA	NA	NA	288	0	219795	NA	3f	0	219795	+
NA	NA	NA	704	0	259120	NA	3g	0	259120	+
NA	NA	NA	661	0	312737	NA	3h	0	312737	+
NA	NA	NA	375	0	1364859	NA	4a	0	1364859	+
NA	NA	NA	157	0	731688	NA	4b	0	731688	+
NA	NA	NA	964	0	825035	NA	4d	0	825035	+
NA	NA	NA	858	0	2158429	NA	4e	0	2158429	+
NA	NA	NA	86	0	2019173	NA	4g	0	2019173	+
NA	NA	NA	303	0	1523749	NA	4h	0	1523749	-
NA	NA	NA	104	0	1283449	NA	4i	0	1283449	-
NA	NA	NA	392	0	839915	NA	4j	0	839915	+
NA	NA	NA	107	0	267721	NA	4l	0	267721	+
NA	NA	NA	504	0	1421944	NA	4o	0	1421944	-
NA	NA	NA	501	0	569181	NA	4r	0	569181	-
NA	NA	NA	1000	0	210131	NA	4s	0	210131	-
NA	NA	NA	1053	0	437901	NA	5a	0	437901	+
NA	NA	NA	426	0	982351	NA	5b	0	982351	+
NA	NA	NA	451	0	542102	NA	5e	0	542102	-
NA	NA	NA	138	0	1016195	NA	5f	0	1016195	-
NA	NA	NA	180a	0	1083382	NA	5h	0	1083382	+
NA	NA	NA	171	0	2848140	NA	6c	0	2848140	+
NA	NA	NA	757	0	250545	NA	6d	0	250545	+
NA	NA	NA	465	0	284792	NA	6e	0	284792	-
NA	NA	NA	1208	0	250173	NA	7b	0	250173	+
NA	NA	NA	514	0	722956	NA	7c-a	0	722956	+
NA	NA	NA	243	0	845244	NA	8c	0	845244	+
NA	NA	NA	308	0	1077460	NA	8d	0	1077460	+
NA	NA	NA	268	0	619646	NA	8e	0	619646	+
NA	NA	NA	633	0	666662	NA	9b	0	666662	+
NA	NA	NA	306b	373042	5637556	NA	14b-a	0	5264514	-
NA	NA	NA	180b	1083382	1894425	NA	2o	0	811043	+
NA	NA	NA	121b	1749379	2275604	NA	1b	0	526225	+
NA	NA	NA	121c	2275604	2822310	NA	1a	0	546706	+
NA	NA	NA	172b	4452559	7630735	NA	34l	0	3178176	+
NA	NA	NA	852	0	291196	NA	18a	199673	490869	-
NA	NA	NA	114	0	4234233	NA	34h	205852	4440085	-
NA	NA	NA	741	0	696846	NA	4s	210131	906977	-
NA	NA	NA	240	0	833150	NA	6d	250645	1083795	+
NA	NA	NA	133	0	1135308	NA	28a	273826	1409134	-
NA	NA	NA	543	0	661153	NA	6e	284892	946045	+
NA	NA	NA	100b	1139104	4717507	NA	20d-a	373598	3952001	-
NA	NA	NA	464	31	348635	NA	1h	420372	768976	+
NA	NA	NA	198	0	201090	NA	19a	458930	660020	+
NA	NA	NA	166	0	714592	NA	18a	490969	1205561	-
NA	NA	NA	873	31	329632	NA	2g	525639	855240	+
NA	NA	NA	218	0	4344174	NA	5e	542202	4886376	+
NA	NA	NA	236	0	2717377	NA	2n	546870	3264247	-
NA	NA	NA	547	0	1566467	NA	4r	569281	2135748	-
NA	NA	NA	745	0	248013	NA	10a	585542	833555	+
NA	NA	NA	582	0	396540	NA	8e	619746	1016286	-
NA	NA	NA	1020	0	304230	NA	19a	660120	964350	-
NA	NA	NA	181	0	1718293	NA	9b	666762	2385055	-
NA	NA	NA	128a	0	2079184	NA	7c-a	723056	2802240	+
NA	NA	NA	329	0	1240275	NA	1h	769076	2009351	+
NA	NA	NA	609	0	575716	NA	10a	833555	1409271	-
NA	NA	NA	380	0	736779	NA	2g	855340	1592119	-
NA	NA	NA	9	0	4421742	NA	34k	897750	5319492	+
NA	NA	NA	281	0	691373	NA	19a	964450	1655823	+
NA	NA	NA	552	0	479421	NA	5f	1016295	1495716	-
NA	NA	NA	626	0	657185	NA	34i	1045049	1702234	-
NA	NA	NA	730	0	207900	NA	3c	1078713	1286613	-
NA	NA	NA	727	0	205172	NA	2h	1103149	1308321	+
NA	NA	NA	57	0	878108	NA	2k	1149863	2027971	-
NA	NA	NA	255	0	693491	NA	3b	1158800	1852291	+
NA	NA	NA	719	0	204186	NA	18a	1205661	1409847	+
NA	NA	NA	810	0	458432	NA	4i	1283449	1741881	-
NA	NA	NA	323	0	579743	NA	3c	1286713	1866456	-
NA	NA	NA	270	31	496009	NA	12a	1287642	1783620	+
NA	NA	NA	575a	0	359548	NA	4a	1364959	1724507	+
NA	NA	NA	713	0	337288	NA	10a	1409371	1746659	+
NA	NA	NA	172a	0	4452559	NA	34g	1491440	5943999	-
NA	NA	NA	405	0	432941	NA	4h	1523749	1956690	-
NA	NA	NA	488	31	267618	NA	2g	1592119	1859706	+
NA	NA	NA	8	0	1852765	NA	34i	1702334	3555099	+
NA	NA	NA	754	0	173485	NA	4i	1741881	1915366	-
NA	NA	NA	625	31	1338258	NA	12a	1783620	3121816	+
NA	NA	NA	325	0	1958751	NA	3b	1852391	3811142	-
NA	NA	NA	578	0	1292840	NA	34d	1886952	3179792	+
NA	NA	NA	443	31	669040	NA	4i	1915366	2584375	+
NA	NA	NA	1469	0	215449	NA	9b	2385155	2600604	-
NA	NA	NA	412	0	1219242	NA	9b	2600704	3819946	-
NA	NA	NA	335b	1287642	3333588	NA	12a	3121916	5167862	+
NA	NA	NA	215	0	4145114	NA	34d	3179892	7325006	+
NA	NA	NA	699	0	1626724	NA	2e	3928099	5554823	-
NA	NA	NA	161	0	11859676	NA	5e	4886476	16746152	+
NA	NA	NA	982	0	338251	NA	34k	5319592	5657843	+
NA	NA	NA	476	0	814385	NA	34k	5657943	6472328	+
NA	NA	NA	1102	0	189023	NA	34g	5944099	6133122	+
NA	NA	NA	105	0	846974	NA	34g	6133222	6980196	+
NA	NA	NA	53	0	3055604	NA	34d	7325106	10380710	+
NA	NA	NA	22	0	3218087	NA	34d	10380810	13598897	-
NA	NA	NA	948	0	580733	NA	34d	13598997	14179730	+
