# Supplementary material for: Upgrading short-read animal genome assemblies to chromosome level using comparative genomics and a universal probe set
Source: Genome Res. 2017 May;27(5):875–84. doi: 10.1101/gr.213660.116 (PMC5411781; doi:10.1101/gr.213660.116)
Supplement: Supplemental Material [file supp_gr.213660.116_Supplemental_Table_S10.xlsx]

## Sheet: EBRs
Supplemental Table S9. Chicken genome intervals corresponding to the lineage-specific EBRs.
Chicken chr	Start (bp)	End (bp)	Size (bp)	Chicken chr	Start (bp)	End (bp)	Size	EBR type	Lineage
1	1324368	1324800	432	NA	NA	NA	NA	Intrachromosomal	Peregrine falcon
1	6029884	6031169	1285	NA	NA	NA	NA	Intrachromosomal	Peregrine falcon
1	7914166	7914732	566	NA	NA	NA	NA	Intrachromosomal	Peregrine falcon
1	8882618	8887826	5208	NA	NA	NA	NA	Intrachromosomal	Chicken
1	9219766	9224154	4388	NA	NA	NA	NA	Intrachromosomal	Chicken
1	9884967	9885328	361	NA	NA	NA	NA	Intrachromosomal	Peregrine falcon
1	26812569	26815922	3353	NA	NA	NA	NA	Intrachromosomal	Peregrine falcon
1	28404118	28405020	902	NA	NA	NA	NA	Intrachromosomal	Flycatcher
1	28973698	28974040	342	NA	NA	NA	NA	Intrachromosomal	Flycatcher
1	39784124	39784258	134	NA	NA	NA	NA	Intrachromosomal	Peregrine falcon
1	47452522	47453443	921	NA	NA	NA	NA	Intrachromosomal	Peregrine falcon
1	47570545	47628260	57715	NA	NA	NA	NA	Intrachromosomal	Peregrine falcon
1	54853254	54857707	4453	NA	NA	NA	NA	Intrachromosomal	Pigeon
1	56803036	56811099	8063	NA	NA	NA	NA	Intrachromosomal	Zebra finch
1	57155309	57156419	1110	NA	NA	NA	NA	Intrachromosomal	Flycatcher
1	57489115	57491098	1983	NA	NA	NA	NA	Intrachromosomal	Flycatcher
1	58476175	58476241	66	NA	NA	NA	NA	Intrachromosomal	Pigeon
1	61930217	61930280	63	NA	NA	NA	NA	Intrachromosomal	Flycatcher
1	62681919	62696997	15078	NA	NA	NA	NA	Intrachromosomal	Flycatcher
1	63084381	63084436	55	NA	NA	NA	NA	Intrachromosomal	Flycatcher
1	64154506	64154603	97	NA	NA	NA	NA	Intrachromosomal	Flycatcher
1	64309525	64311297	1772	NA	NA	NA	NA	Intrachromosomal	Flycatcher
1	65274220	65280569	6349	NA	NA	NA	NA	Intrachromosomal	Flycatcher
1	65338671	65343204	4533	NA	NA	NA	NA	Intrachromosomal	Zebra finch
1	65434145	65441412	7267	NA	NA	NA	NA	Intrachromosomal	Flycatcher
1	66649227	66649812	585	NA	NA	NA	NA	Intrachromosomal	Zebra finch
1	69390834	69391367	533	NA	NA	NA	NA	Intrachromosomal	Flycatcher
1	69938074	70043043	104969	NA	NA	NA	NA	Intrachromosomal	Zebra finch
1	71592439	71593557	1118	NA	NA	NA	NA	Intrachromosomal	Flycatcher
1	71784616	71828201	43585	NA	NA	NA	NA	Intrachromosomal	Zebra finch
1	72413660	72414700	1040	NA	NA	NA	NA	Intrachromosomal	Chicken
1	72988017	72994267	6250	NA	NA	NA	NA	Intrachromosomal	Zebra finch
1	73158211	73168020	9809	NA	NA	NA	NA	Intrachromosomal	Chicken
1	74158301	74236372	78071	NA	NA	NA	NA	Intrachromosomal	Flycatcher
1	74604570	74642939	38369	NA	NA	NA	NA	Fission GGA1	Peregrine falcon, flycatcher, zebra finch
1	74608437	75953766	1345329	NA	NA	NA	NA	Intrachromosomal	Chicken
1	79266404	80323581	1057177	NA	NA	NA	NA	Intrachromosomal	Pigeon
1	83482558	83485084	2526	NA	NA	NA	NA	Intrachromosomal	Flycatcher
1	83918384	83934204	15820	NA	NA	NA	NA	Intrachromosomal	Zebra finch
1	86964089	86964101	12	NA	NA	NA	NA	Intrachromosomal	Pigeon
1	91171371	91174910	3539	NA	NA	NA	NA	Intrachromosomal	Pigeon
1	98960025	98962906	2881	NA	NA	NA	NA	Intrachromosomal	Pigeon
1	104819863	104825312	5449	NA	NA	NA	NA	Intrachromosomal	Flycatcher
1	105212045	105344966	132921	NA	NA	NA	NA	Intrachromosomal	Zebra finch
1	105370750	105382220	11470	NA	NA	NA	NA	Intrachromosomal	Flycatcher
1	105563181	105564585	1404	NA	NA	NA	NA	Intrachromosomal	Flycatcher
1	105742052	105743256	1204	NA	NA	NA	NA	Intrachromosomal	Flycatcher
1	115150914	115151711	797	NA	NA	NA	NA	Intrachromosomal	Pigeon
1	115309400	115312620	3220	NA	NA	NA	NA	Intrachromosomal	Pigeon
1	127819431	127841128	21697	NA	NA	NA	NA	Intrachromosomal	Peregrine falcon
1	131824670	131827102	2432	NA	NA	NA	NA	Intrachromosomal	Pigeon
1	149440203	149444844	4641	NA	NA	NA	NA	Intrachromosomal	Zebra finch
1	179001619	179001763	144	NA	NA	NA	NA	Intrachromosomal	Zebra finch
2	1	20713	20712	ND	ND	ND	ND	Fusion GGA2-28	Peregrine falcon
2	931838	970908	39070	NA	NA	NA	NA	Intrachromosomal	Chicken
2	4047548	4051400	3852	NA	NA	NA	NA	Intrachromosomal	Chicken
2	26118162	26118232	70	NA	NA	NA	NA	Intrachromosomal	Zebra finch
2	48696437	64084268	15387831	NA	NA	NA	NA	Fission GGA2	Peregrine falcon
2	48696437	64084268	15387831	ND	ND	ND	ND	Fusion GGA2-21	Peregrine falcon
2	55627369	56187871	560502	NA	NA	NA	NA	Intrachromosomal	Flycatcher
2	59440356	64180770	4740414	NA	NA	NA	NA	Intrachromosomal	Zebra finch
2	68914935	69067473	152538	NA	NA	NA	NA	Intrachromosomal	Pigeon
2	70347550	70349506	1956	NA	NA	NA	NA	Intrachromosomal	Peregrine falcon
2	72395280	72502961	107681	NA	NA	NA	NA	Intrachromosomal	Pigeon
2	72631037	73494981	863944	NA	NA	NA	NA	Intrachromosomal	Zebra finch
2	94127281	94234930	107649	NA	NA	NA	NA	Intrachromosomal	Zebra finch
2	94829596	94837624	8028	NA	NA	NA	NA	Intrachromosomal	Zebra finch
2	120100222	120100272	50	NA	NA	NA	NA	Intrachromosomal	Peregrine falcon
2	121362131	121362153	22	NA	NA	NA	NA	Intrachromosomal	Peregrine falcon
2	121563369	121563397	28	NA	NA	NA	NA	Intrachromosomal	Peregrine falcon
2	145288500	145289895	1395	NA	NA	NA	NA	Intrachromosomal	Peregrine falcon
3	2395028	2406457	11429	NA	NA	NA	NA	Intrachromosomal	Chicken
3	11266541	11271715	5174	NA	NA	NA	NA	Intrachromosomal	Peregrine falcon
3	11571165	11619462	48297	NA	NA	NA	NA	Intrachromosomal	Chicken
3	11929811	11953549	23738	NA	NA	NA	NA	Intrachromosomal	Chicken
3	12514375	12514413	38	NA	NA	NA	NA	Intrachromosomal	Zebra finch
3	13572601	13572601	0	NA	NA	NA	NA	Intrachromosomal	Flycatcher
3	14195505	14195923	418	NA	NA	NA	NA	Intrachromosomal	Flycatcher
3	16277015	16282517	5502	NA	NA	NA	NA	Intrachromosomal	Chicken
3	17015103	17057419	42316	NA	NA	NA	NA	Intrachromosomal	Zebra finch
3	24696708	24696885	177	NA	NA	NA	NA	Intrachromosomal	Flycatcher
3	26123868	26126691	2823	NA	NA	NA	NA	Intrachromosomal	Zebra finch
3	26747128	26749339	2211	NA	NA	NA	NA	Intrachromosomal	Flycatcher
3	28440655	28440817	162	NA	NA	NA	NA	Intrachromosomal	Zebra finch
3	33171474	33191237	19763	NA	NA	NA	NA	Fission GGA3	Peregrine falcon
3	40468377	40468377	0	NA	NA	NA	NA	Intrachromosomal	Peregrine falcon
3	70642811	70676596	33785	NA	NA	NA	NA	Intrachromosomal	Peregrine falcon
3	106856633	106856944	311	NA	NA	NA	NA	Intrachromosomal	Peregrine falcon
4	2020905	2022164	1259	NA	NA	NA	NA	Intrachromosomal	Pigeon
4	5007908	5141468	133560	NA	NA	NA	NA	Intrachromosomal	Pigeon
4	13760221	13931036	170815	NA	NA	NA	NA	Intrachromosomal	Pigeon
4	16440524	16454171	13647	NA	NA	NA	NA	Intrachromosomal	Pigeon
4	19198385	19203158	4773	NA	NA	NA	NA	Fusion GGA4	Chicken
4	20643486	20643751	265	NA	NA	NA	NA	Intrachromosomal	Peregrine falcon
4	20773991	20774533	542	NA	NA	NA	NA	Intrachromosomal	Peregrine falcon
4	28278509	28823040	544531	NA	NA	NA	NA	Intrachromosomal	Zebra finch
4	34474454	34474907	453	NA	NA	NA	NA	Intrachromosomal	Chicken
4	36711371	36716488	5117	NA	NA	NA	NA	Intrachromosomal	Chicken
4	36968524	37003727	35203	NA	NA	NA	NA	Intrachromosomal	Flycatcher
4	38056016	38057837	1821	NA	NA	NA	NA	Intrachromosomal	Flycatcher
4	38688788	38817468	128680	NA	NA	NA	NA	Intrachromosomal	Chicken
4	39418367	39438868	20501	NA	NA	NA	NA	Intrachromosomal	Pigeon
4	41738397	42076213	337816	NA	NA	NA	NA	Intrachromosomal	Chicken
4	44024013	44091739	67726	NA	NA	NA	NA	Intrachromosomal	Chicken
4	46254077	46254681	604	NA	NA	NA	NA	Intrachromosomal	Zebra finch
4	57795684	57801782	6098	NA	NA	NA	NA	Intrachromosomal	Chicken
4	60643171	60660962	17791	NA	NA	NA	NA	Intrachromosomal	Chicken
4	61297325	61300911	3586	NA	NA	NA	NA	Intrachromosomal	Peregrine falcon
4	68580126	68581362	1236	NA	NA	NA	NA	Intrachromosomal	Peregrine falcon
4	75558167	76214491	656324	NA	NA	NA	NA	Intrachromosomal	Peregrine falcon
5	3064699	3226802	162103	NA	NA	NA	NA	Intrachromosomal	Chicken
5	3505172	3607787	102615	NA	NA	NA	NA	Intrachromosomal	Zebra finch
5	3920467	3921806	1339	NA	NA	NA	NA	Intrachromosomal	Zebra finch
5	4207837	4225827	17990	NA	NA	NA	NA	Intrachromosomal	Zebra finch
5	5681347	5833445	152098	NA	NA	NA	NA	Intrachromosomal	Chicken
5	6507620	6535656	28036	NA	NA	NA	NA	Intrachromosomal	Chicken
5	11920644	11924718	4074	NA	NA	NA	NA	Intrachromosomal	Peregrine falcon
5	16013932	16016270	2338	NA	NA	NA	NA	Intrachromosomal	Chicken
5	16162195	16419626	257431	NA	NA	NA	NA	Intrachromosomal	Chicken
5	16207082	16208213	1131	20	6982982	6984442	1460	Fusion GGA5-20	Peregrine falcon
5	17825030	17827020	1990	NA	NA	NA	NA	Intrachromosomal	Flycatcher
5	18002051	18002505	454	NA	NA	NA	NA	Intrachromosomal	Chicken
5	18002366	18002434	68	NA	NA	NA	NA	Fission GGA5	Peregrine falcon
5	22198087	22198280	193	NA	NA	NA	NA	Intrachromosomal	Peregrine falcon
5	40665557	40666511	954	NA	NA	NA	NA	Intrachromosomal	Pigeon
5	42299980	42301918	1938	NA	NA	NA	NA	Intrachromosomal	Peregrine falcon
5	50528897	50531950	3053	NA	NA	NA	NA	Intrachromosomal	Peregrine falcon
5	57848407	57863325	14918	NA	NA	NA	NA	Intrachromosomal	Peregrine falcon
5	59525950	59526594	644	10	2429267	2429267	0	Fusion GGA5-10	Peregrine falcon
6	2058825	2126442	67617	NA	NA	NA	NA	Intrachromosomal	Pigeon
6	7240813	7240915	102	17	5876933	5880929	3996	Fusion GGA6-17	Peregrine falcon
6	14957776	14958505	729	NA	NA	NA	NA	Intrachromosomal	Peregrine falcon
6	17123426	17170023	46597	NA	NA	NA	NA	Intrachromosomal	Peregrine falcon
6	29924390	29936355	11965	NA	NA	NA	NA	Intrachromosomal	Peregrine falcon
7	999837	1005793	5956	NA	NA	NA	NA	Intrachromosomal	Peregrine falcon
7	1368850	1406526	37676	NA	NA	NA	NA	Intrachromosomal	Pigeon
7	3526408	3569092	42684	NA	NA	NA	NA	Intrachromosomal	Zebra finch
7	4497339	4501801	4462	NA	NA	NA	NA	Intrachromosomal	Zebra finch
7	5536576	5569739	33163	NA	NA	NA	NA	Intrachromosomal	Zebra finch
7	9278452	9280798	2346	NA	NA	NA	NA	Intrachromosomal	Pigeon
7	9813362	9813362	0	NA	NA	NA	NA	Intrachromosomal	Chicken
7	10014120	10014120	0	NA	NA	NA	NA	Intrachromosomal	Chicken
7	17863268	17864755	1487	NA	NA	NA	NA	Intrachromosomal	Flycatcher
7	18283306	18283720	414	NA	NA	NA	NA	Intrachromosomal	Flycatcher
7	27805170	27805281	111	NA	NA	NA	NA	Intrachromosomal	Zebra finch
8	5073955	5073999	44	NA	NA	NA	NA	Intrachromosomal	Chicken
8	7401061	7405478	4417	NA	NA	NA	NA	Intrachromosomal	Pigeon
8	8030791	10005834	1975043	NA	NA	NA	NA	Intrachromosomal	Chicken
8	18511434	19999999	1488565	NA	NA	NA	NA	Intrachromosomal	Pigeon
8	22246010	23004261	758251	NA	NA	NA	NA	Intrachromosomal	Pigeon
8	23775554	23780105	4551	NA	NA	NA	NA	Intrachromosomal	Flycatcher
9	4116694	4118012	1318	NA	NA	NA	NA	Intrachromosomal	Zebra finch
9	4321288	4322902	1614	NA	NA	NA	NA	Intrachromosomal	Chicken
9	4712939	4863290	150351	NA	NA	NA	NA	Intrachromosomal	Chicken
9	12394835	12394985	150	NA	NA	NA	NA	Intrachromosomal	Pigeon
9	15162865	15171622	8757	NA	NA	NA	NA	Intrachromosomal	Pigeon
9	19341833	19344688	2855	NA	NA	NA	NA	Intrachromosomal	Pigeon
10	2134590	2135412	822	NA	NA	NA	NA	Intrachromosomal	Chicken
10	2456474	3089337	632863	NA	NA	NA	NA	Intrachromosomal	Peregrine falcon
10	3531438	3531937	499	NA	NA	NA	NA	Intrachromosomal	Pigeon
10	3607425	3609795	2370	NA	NA	NA	NA	Intrachromosomal	Zebra finch
10	3609846	3648687	38841	NA	NA	NA	NA	Intrachromosomal	Flycatcher
10	7421814	7422624	810	NA	NA	NA	NA	Intrachromosomal	Pigeon
10	17999142	18000598	1456	NA	NA	NA	NA	Intrachromosomal	Flycatcher
11	338764	348457	9693	NA	NA	NA	NA	Intrachromosomal	Chicken
11	2175213	2176532	1319	NA	NA	NA	NA	Intrachromosomal	Chicken
11	2314761	2315690	929	NA	NA	NA	NA	Intrachromosomal	Chicken
11	2638020	2703827	65807	NA	NA	NA	NA	Intrachromosomal	Chicken
11	3161385	3162962	1577	NA	NA	NA	NA	Intrachromosomal	Pigeon
11	5983232	5992779	9547	NA	NA	NA	NA	Intrachromosomal	Zebra finch
11	7344225	7381817	37592	NA	NA	NA	NA	Intrachromosomal	Pigeon
11	13237592	13237950	358	NA	NA	NA	NA	Intrachromosomal	Zebra finch
11	14586964	14586982	18	NA	NA	NA	NA	Intrachromosomal	Pigeon
11	17092230	17103474	11244	NA	NA	NA	NA	Intrachromosomal	Zebra finch
12	8244390	8244424	34	NA	NA	NA	NA	Intrachromosomal	Pigeon
12	8362979	8367099	4120	NA	NA	NA	NA	Intrachromosomal	Pigeon
12	8508581	8509418	837	NA	NA	NA	NA	Intrachromosomal	Pigeon
12	18624938	18625329	391	NA	NA	NA	NA	Intrachromosomal	Pigeon
13	1	2563	2562	ND	ND	ND	ND	Fusion GGA7-13	Peregrine falcon
13	2656250	2658094	1844	NA	NA	NA	NA	Intrachromosomal	Pigeon
13	4072035	4093791	21756	NA	NA	NA	NA	Intrachromosomal	Pigeon
13	7522370	7522376	6	NA	NA	NA	NA	Intrachromosomal	Pigeon
13	16501929	16564665	62736	NA	NA	NA	NA	Intrachromosomal	Peregrine falcon
13	17498657	17504153	5496	NA	NA	NA	NA	Intrachromosomal	Pigeon
14	6916159	6926191	10032	NA	NA	NA	NA	Intrachromosomal	Flycatcher
14	7258840	7264491	5651	NA	NA	NA	NA	Intrachromosomal	Zebra finch
14	7458981	7459764	783	12	19868308	19897011	28703	Fusion GGA14-12	Peregrine falcon
14	8708224	8722870	14646	NA	NA	NA	NA	Intrachromosomal	Pigeon
14	8900773	8904651	3878	NA	NA	NA	NA	Intrachromosomal	Pigeon
14	13597365	13671981	74616	NA	NA	NA	NA	Intrachromosomal	Chicken
14	14286593	14306071	19478	NA	NA	NA	NA	Intrachromosomal	Chicken
14	14431346	14459945	28599	NA	NA	NA	NA	Intrachromosomal	Chicken
14	14814615	14904537	89922	NA	NA	NA	NA	Intrachromosomal	Chicken
15	1309743	1416134	106391	NA	NA	NA	NA	Intrachromosomal	Pigeon
15	3695551	3702477	6926	19	1	66909	66908	Fusion GGA15-19	Peregrine falcon
15	7846096	7847734	1638	NA	NA	NA	NA	Intrachromosomal	Chicken
15	9909742	10030648	120906	NA	NA	NA	NA	Intrachromosomal	Chicken
17	8315856	8316842	986	NA	NA	NA	NA	Intrachromosomal	Peregrine falcon
17	10394199	10454150	59951	5	24832742	24843616	10874	Fusion GGA17-5	Peregrine falcon
18	3489677	4326327	836650	NA	NA	NA	NA	Intrachromosomal	Peregrine falcon
18	4442787	4445807	3020	NA	NA	NA	NA	Intrachromosomal	Pigeon
18	4592395	4600415	8020	NA	NA	NA	NA	Intrachromosomal	Pigeon
18	4812654	4815509	2855	NA	NA	NA	NA	Intrachromosomal	Chicken
18	5037378	5037399	21	NA	NA	NA	NA	Intrachromosomal	Chicken
18	6003931	6011826	7895	NA	NA	NA	NA	Intrachromosomal	Pigeon
18	6541981	6543165	1184	NA	NA	NA	NA	Intrachromosomal	Zebra finch
18	6624558	6626204	1646	NA	NA	NA	NA	Intrachromosomal	Peregrine falcon
18	8243821	8460485	216664	NA	NA	NA	NA	Intrachromosomal	Zebra finch
18	10249436	10253576	4140	NA	NA	NA	NA	Intrachromosomal	Chicken
19	2491720	2931925	440205	NA	NA	NA	NA	Intrachromosomal	Pigeon
19	9942178	9962510	20332	18	4437561	4437561	0	Fusion GGA19-18	Peregrine falcon
20	937650	943963	6313	NA	NA	NA	NA	Intrachromosomal	Flycatcher
20	1642252	4945945	3303693	NA	NA	NA	NA	Intrachromosomal	Flycatcher
20	11104290	11105020	730	NA	NA	NA	NA	Intrachromosomal	Chicken
21	171731	172267	536	NA	NA	NA	NA	Intrachromosomal	Chicken
21	2447743	2520267	72524	NA	NA	NA	NA	Intrachromosomal	Zebra finch
21	2534001	2534006	5	NA	NA	NA	NA	Intrachromosomal	Peregrine falcon
21	2780061	2780375	314	NA	NA	NA	NA	Intrachromosomal	Peregrine falcon
21	3031447	3031929	482	NA	NA	NA	NA	Intrachromosomal	Peregrine falcon
21	4201584	4202188	604	NA	NA	NA	NA	Intrachromosomal	Chicken
21	4423965	4425044	1079	NA	NA	NA	NA	Intrachromosomal	Zebra finch
21	4947252	4948468	1216	NA	NA	NA	NA	Intrachromosomal	Flycatcher
22	454415	456267	1852	NA	NA	NA	NA	Intrachromosomal	Chicken
22	2750596	2783326	32730	NA	NA	NA	NA	Intrachromosomal	Chicken
23	3151880	3208232	56352	NA	NA	NA	NA	Intrachromosomal	Chicken
23	4554121	4554183	62	NA	NA	NA	NA	Intrachromosomal	Peregrine falcon
23	4802961	5045626	242665	NA	NA	NA	NA	Intrachromosomal	Zebra finch
24	657347	660000	2653	NA	NA	NA	NA	Intrachromosomal	Zebra finch
24	2899660	2905523	5863	NA	NA	NA	NA	Intrachromosomal	Zebra finch
24	3194369	3194441	72	NA	NA	NA	NA	Intrachromosomal	Peregrine falcon
24	3786014	3788248	2234	NA	NA	NA	NA	Intrachromosomal	Pigeon
24	4336751	4336769	18	NA	NA	NA	NA	Intrachromosomal	Chicken
24	5498139	5570339	72200	NA	NA	NA	NA	Intrachromosomal	Chicken
24	5707069	5708160	1091	NA	NA	NA	NA	Intrachromosomal	Chicken
24	6111047	6114494	3447	NA	NA	NA	NA	Intrachromosomal	Peregrine falcon
26	1618988	2124876	505888	NA	NA	NA	NA	Intrachromosomal	Chicken
26	2427305	2427873	568	NA	NA	NA	NA	Intrachromosomal	Pigeon
26	2581525	2589502	7977	NA	NA	NA	NA	Intrachromosomal	Zebra finch
26	3150633	3152441	1808	NA	NA	NA	NA	Intrachromosomal	Flycatcher
26	3416031	3417505	1474	NA	NA	NA	NA	Intrachromosomal	Pigeon
26	4017799	4019987	2188	NA	NA	NA	NA	Intrachromosomal	Chicken
27	1551217	1587888	36671	NA	NA	NA	NA	Intrachromosomal	Zebra finch
27	1660471	1662243	1772	NA	NA	NA	NA	Intrachromosomal	Pigeon
27	2323210	2330928	7718	NA	NA	NA	NA	Intrachromosomal	Pigeon
27	2828063	2837768	9705	NA	NA	NA	NA	Intrachromosomal	Pigeon
28	4042843	4042855	12	14	650373	666763	16390	Fusion GGA28-14	Peregrine falcon
28	4082833	4084257	1424	NA	NA	NA	NA	Intrachromosomal	Flycatcher
23	4406830	4406830	0	ND	ND	ND	ND	Fusion GGA23-21	Peregrine falcon
15	3695551	3702477	6926	ND	ND	ND	ND	Fusion GGA15-4	Peregrine falcon
Z	1814281	1815225	944	NA	NA	NA	NA	Intrachromosomal	Zebra finch
Z	7193324	7329824	136500	NA	NA	NA	NA	Intrachromosomal	Flycatcher
Z	12772165	12776763	4598	NA	NA	NA	NA	Intrachromosomal	Pigeon
Z	19484554	22168262	2683708	NA	NA	NA	NA	Intrachromosomal	Zebra finch
Z	23034483	23646027	611544	NA	NA	NA	NA	Intrachromosomal	Zebra finch
Z	30601213	30617877	16664	NA	NA	NA	NA	Intrachromosomal	Chicken
Z	30720869	30721276	407	NA	NA	NA	NA	Intrachromosomal	Chicken
Z	36523733	36904832	381099	NA	NA	NA	NA	Intrachromosomal	Flycatcher
Z	37191363	37208200	16837	NA	NA	NA	NA	Intrachromosomal	Pigeon
Z	40672853	41092932	420079	NA	NA	NA	NA	Intrachromosomal	Zebra finch
In bold are the intervals used in CNE analysis
NA: not applicable
ND: not determined
