# Supplementary material for: Upgrading short-read animal genome assemblies to chromosome level using comparative genomics and a universal probe set
Source: HighWire-hosted journal article supplement (doi:10.1101/gr.213660.116), 2016-11-30
Supplement: Supplemental_Fig_S4.pdf [file Supplemental_Fig_S4.pdf]

Pigeon:150K

202,061,739

1

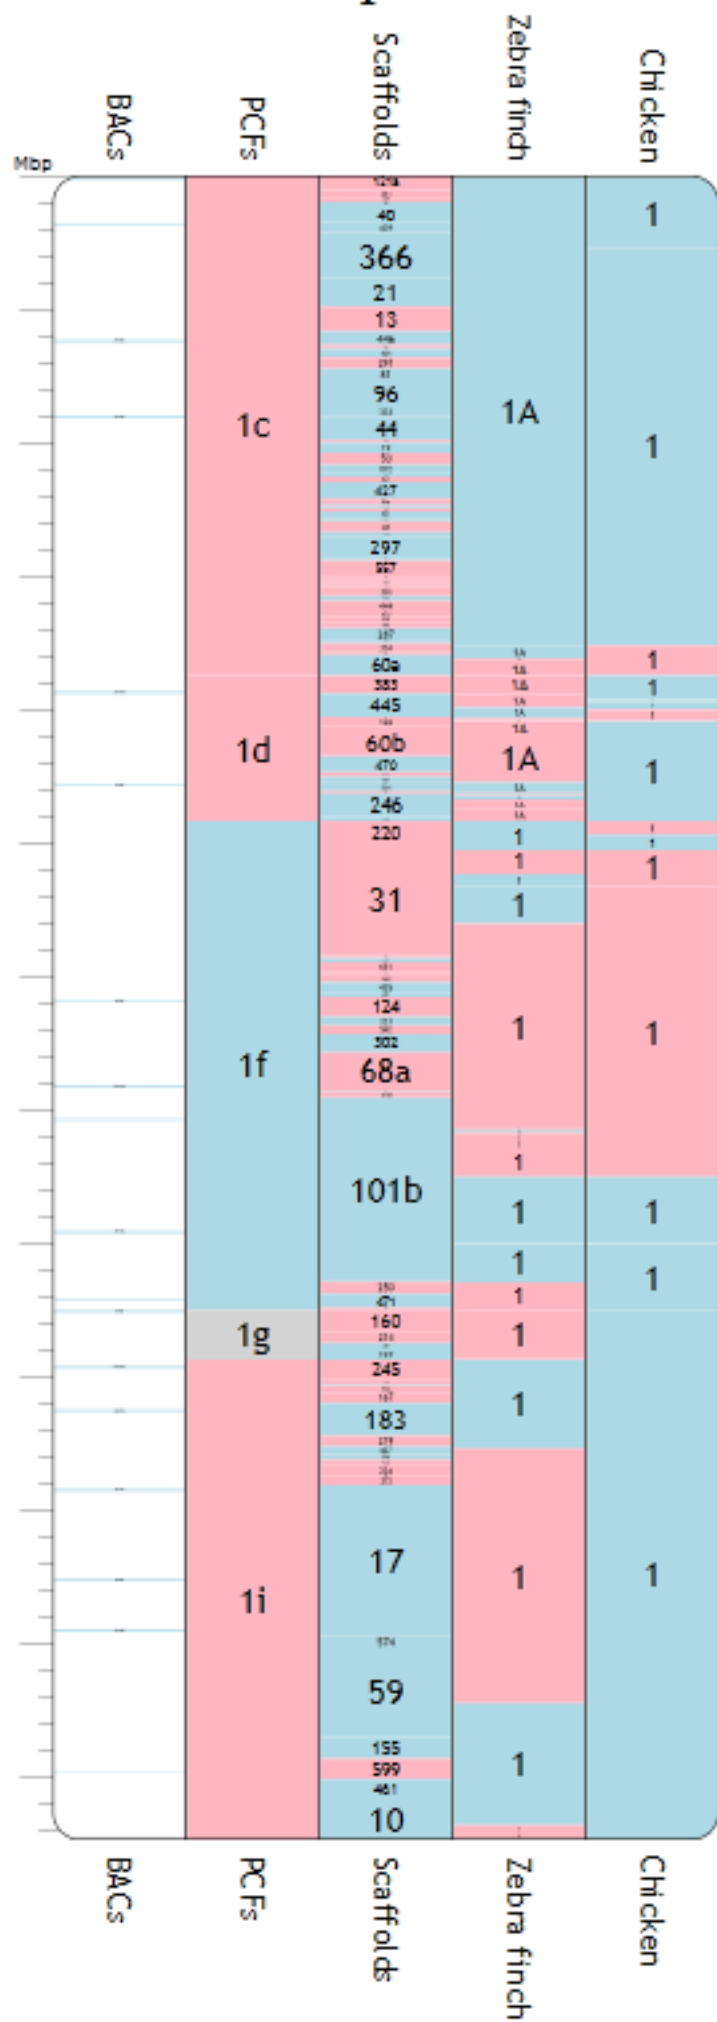

Pigeon:150K

135,781,963

2

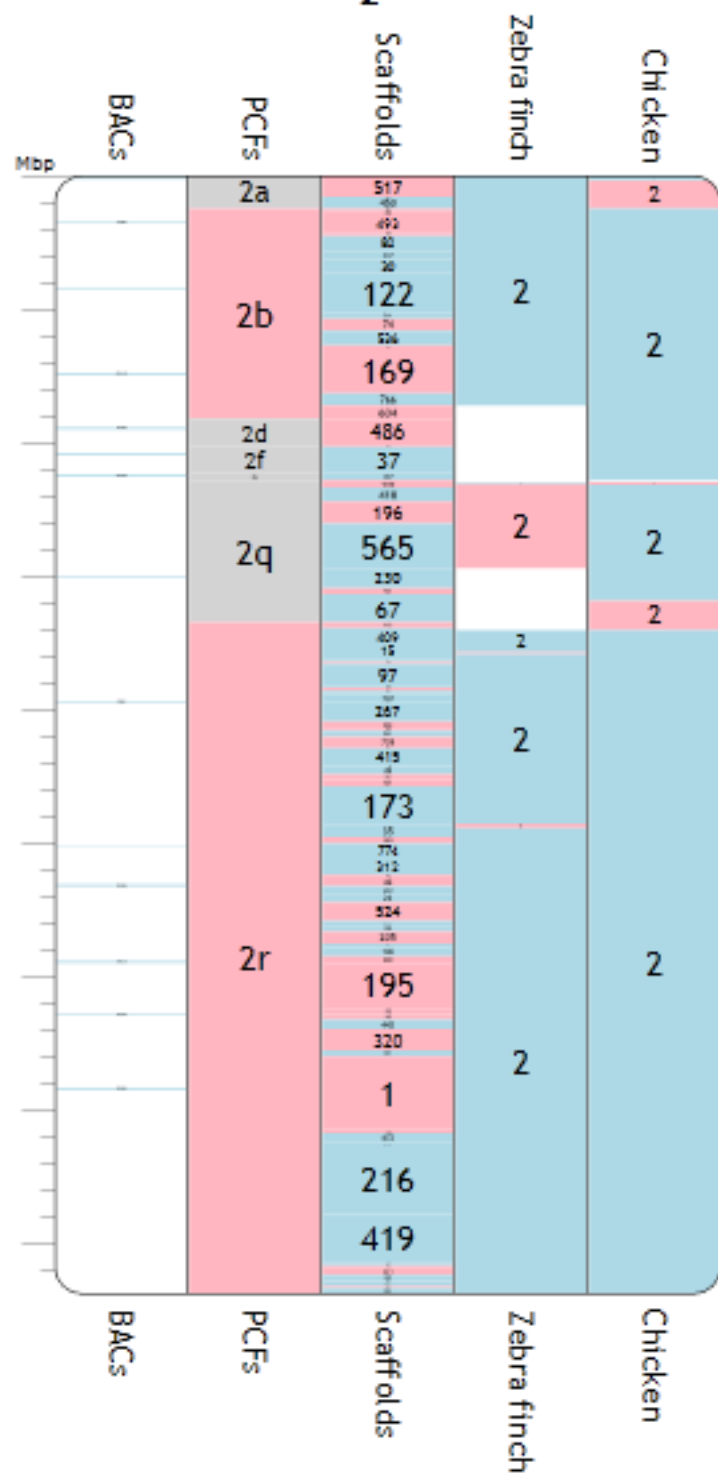

# Pigeon:150K

111,278,426

3

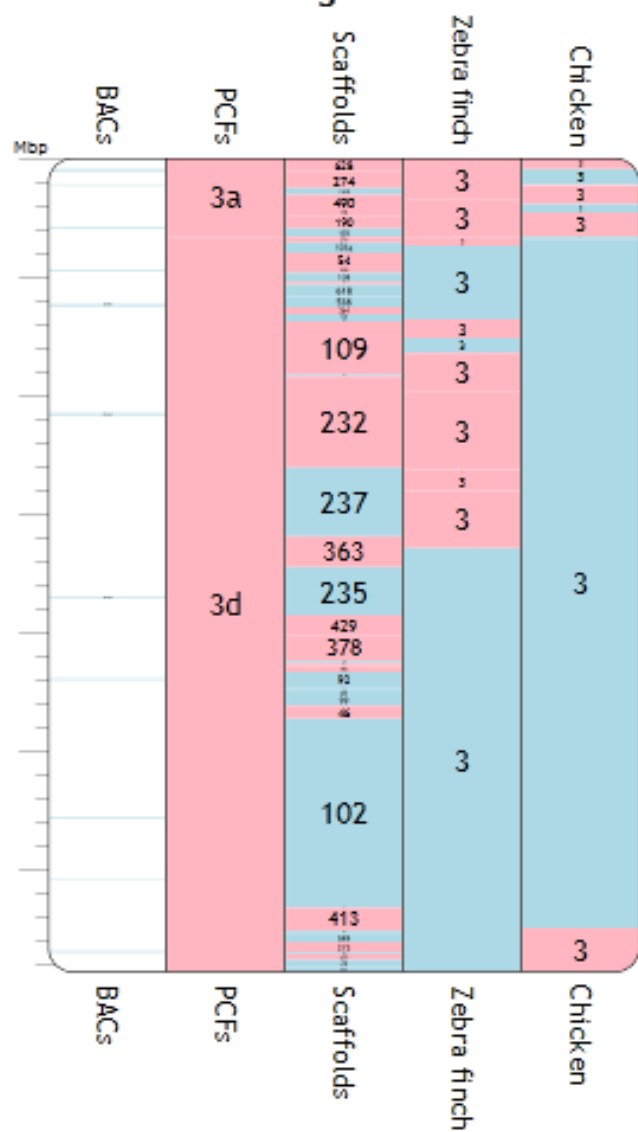

# Pigeon:150K

64,937,494

4

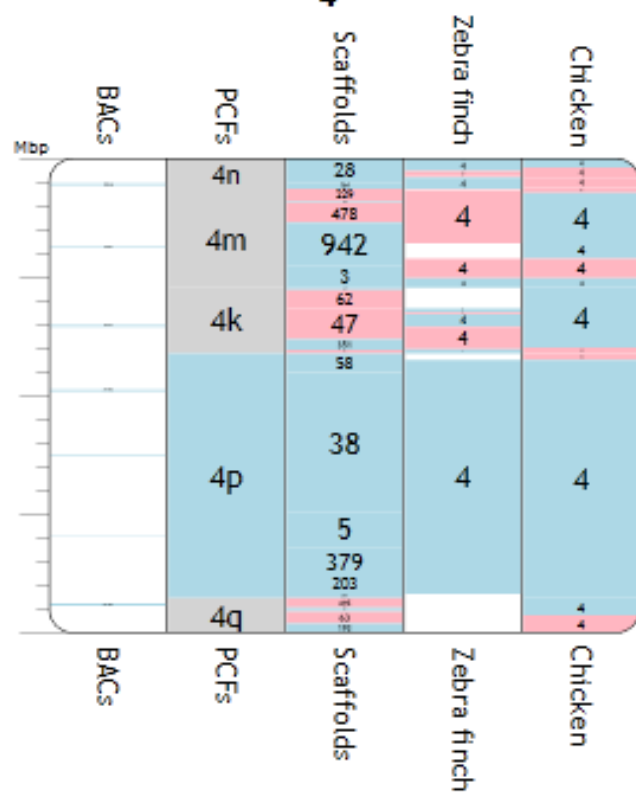

# Pigeon:150K

47,164,716

5

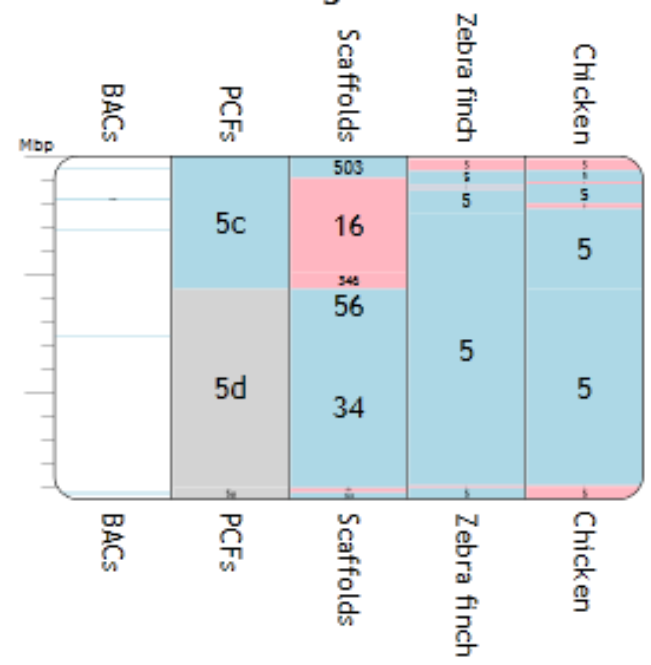

# Pigeon:150K

15,045,679

4A

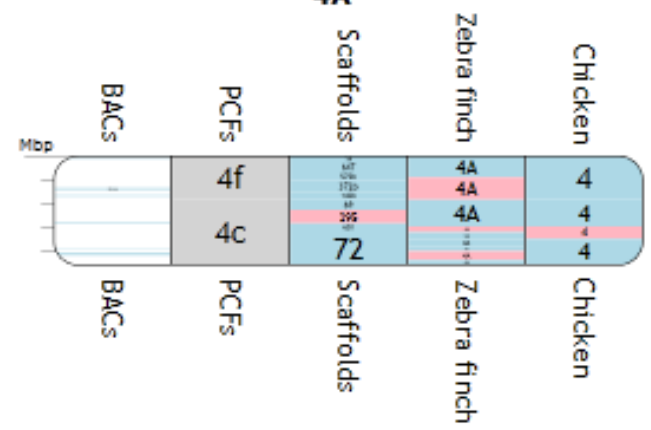

# Pigeon:150K

36,651,012

6

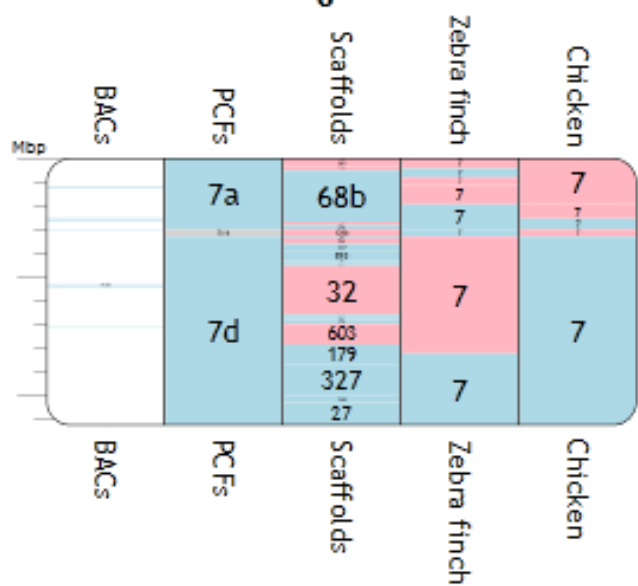

# Pigeon:150K

32,845,769

7

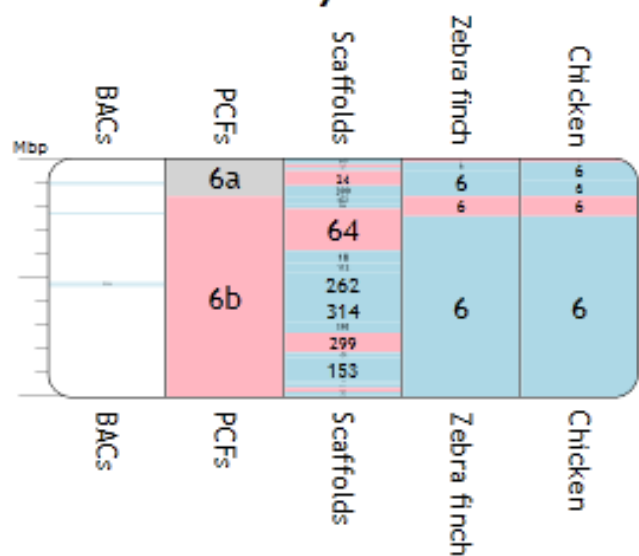

**Pigeon:150K**

22,375,840

**9**

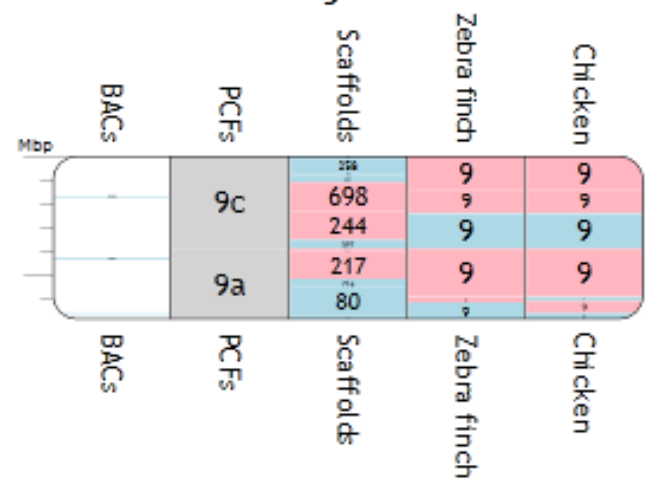

**Pigeon:150K**

30,029,501

**8**

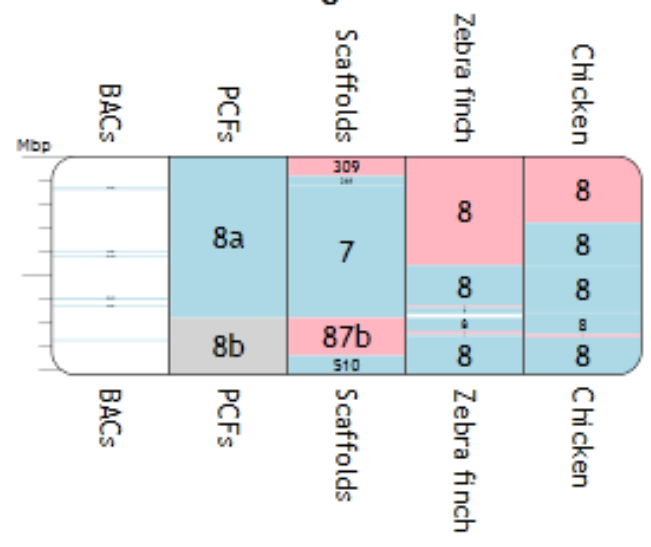

# Pigeon:150K

19,326,846

10

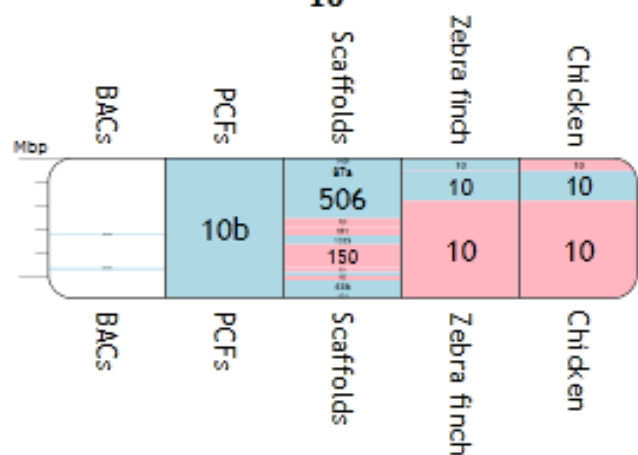

# Pigeon:150K

20,992,093

11

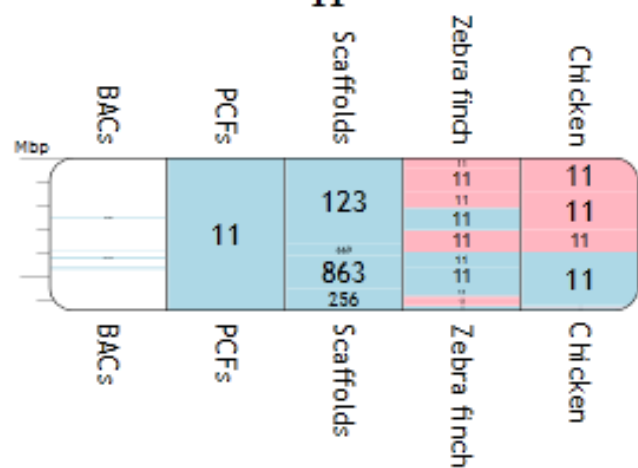

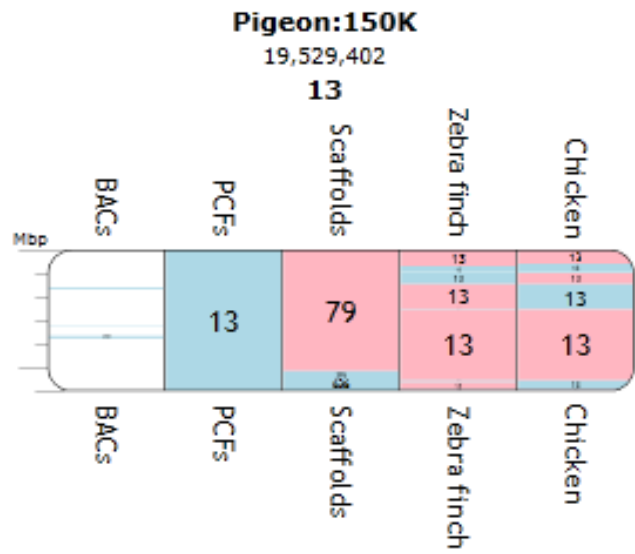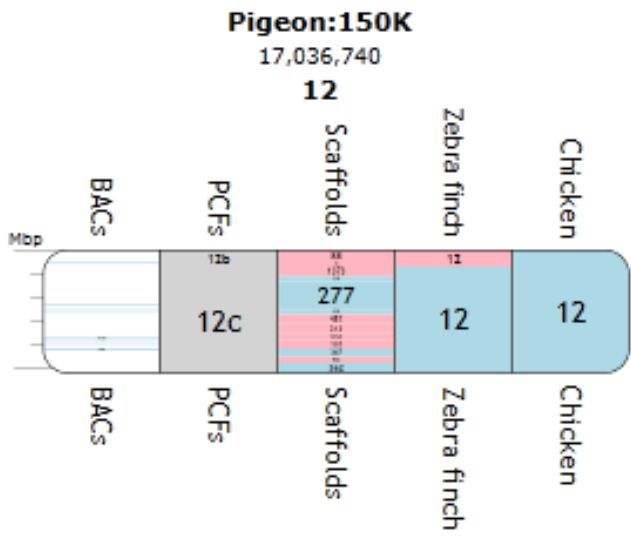

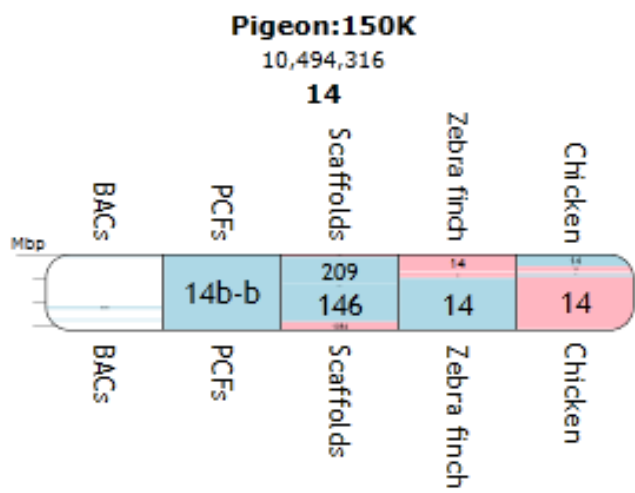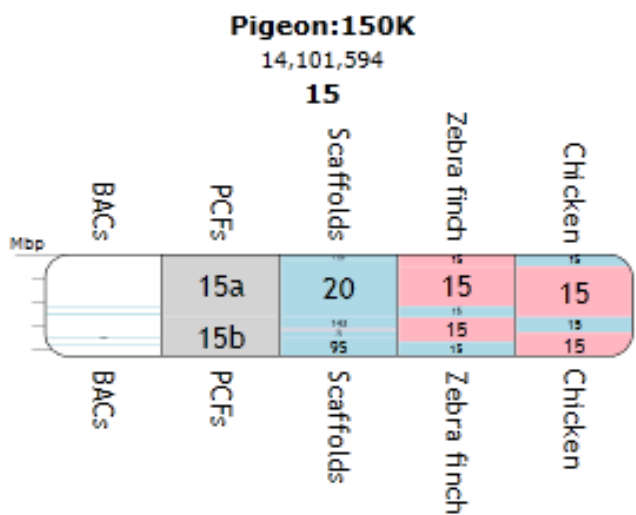



**Pigeon:150K**

9,343,545

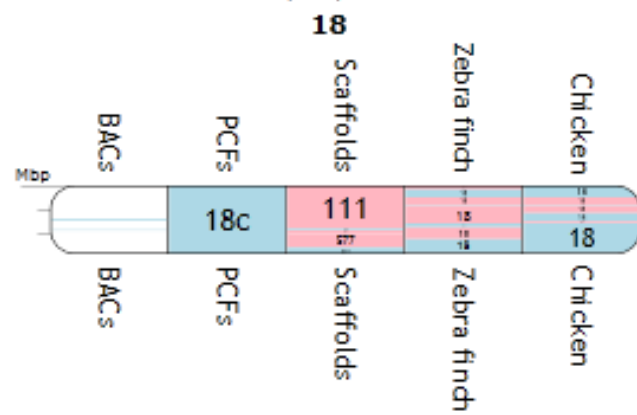

**Pigeon:150K**

10,772,630

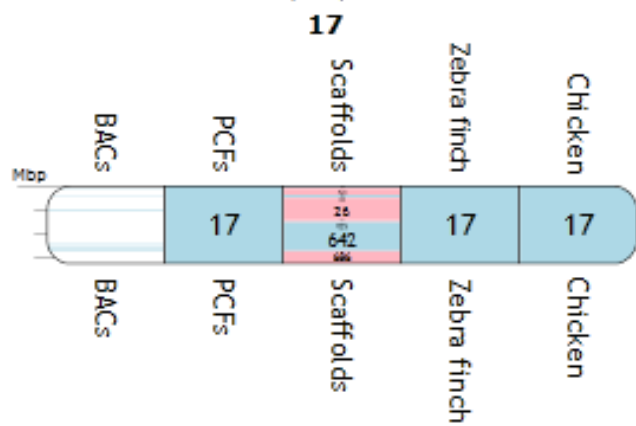

**Pigeon:150K**

9,443,883

**20**

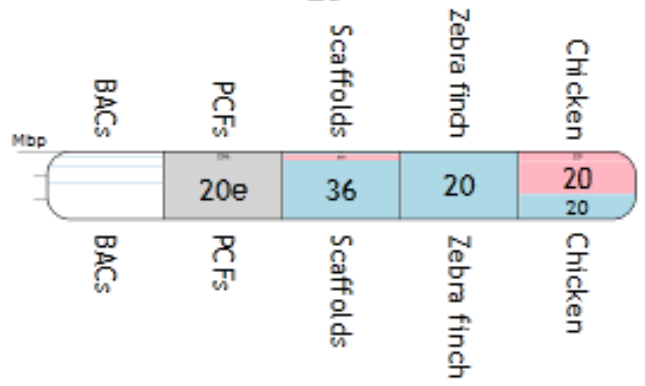

**Pigeon:150K**

8,983,367

**19**

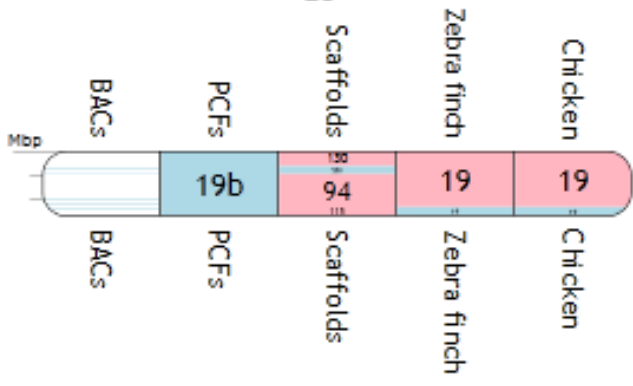

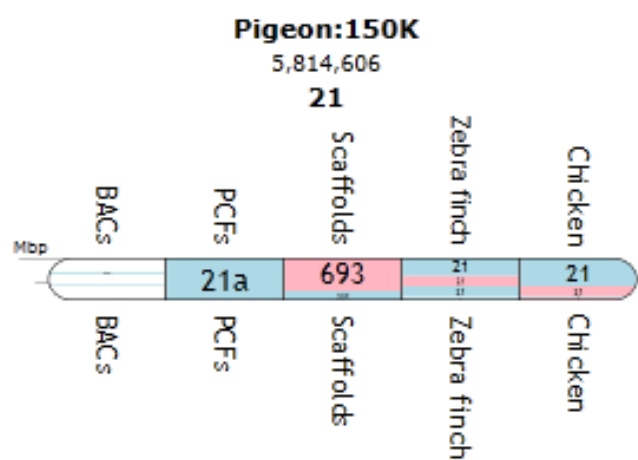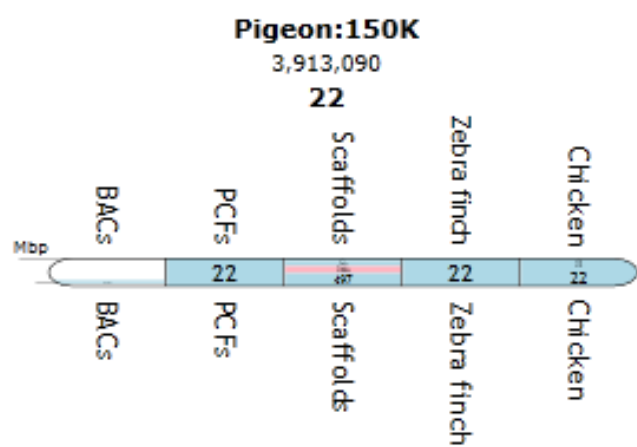

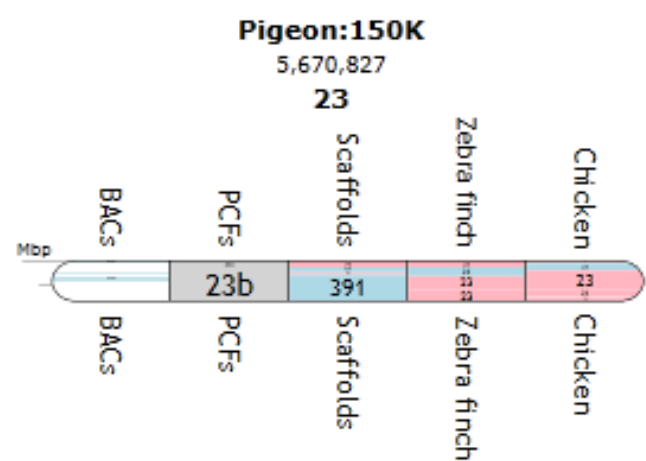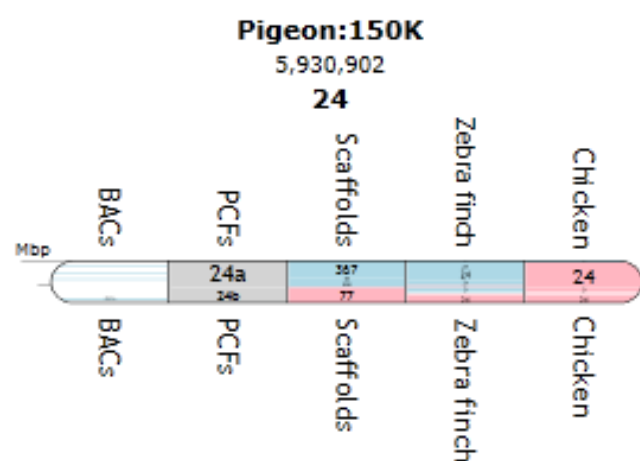

**Pigeon:150K**

3,393,753

**26**

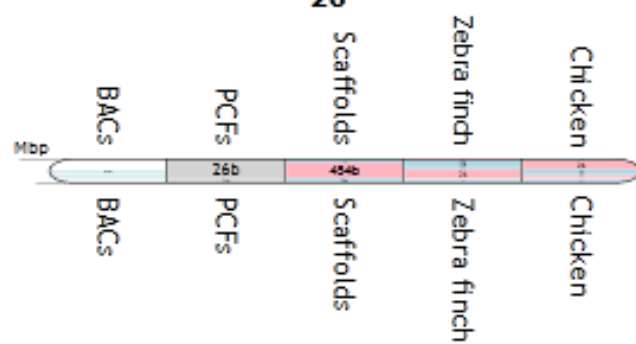

**Pigeon:150K**

765,080

**25**

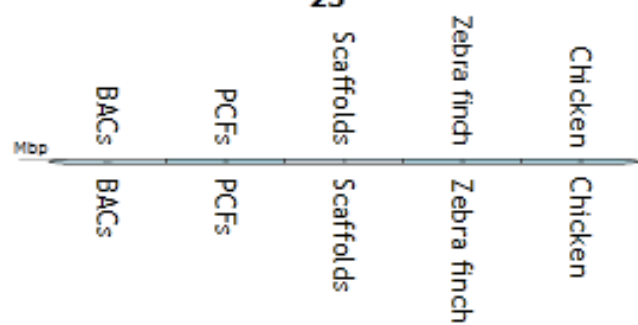

Pigeon:150K

1,542,383

28

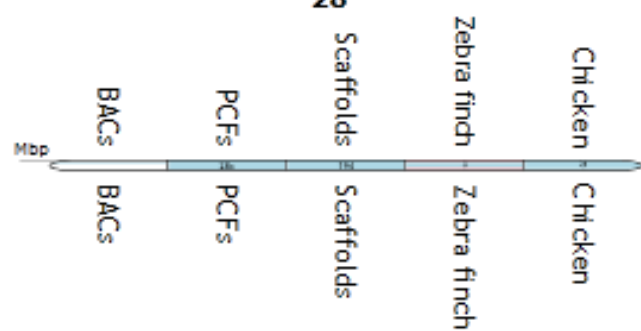

Pigeon:150K

4,918,377

27

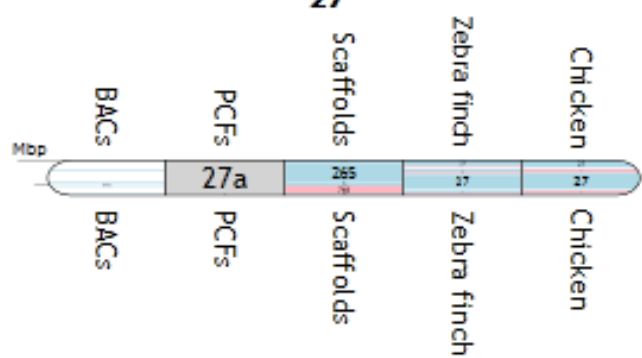

**29 (Z)**

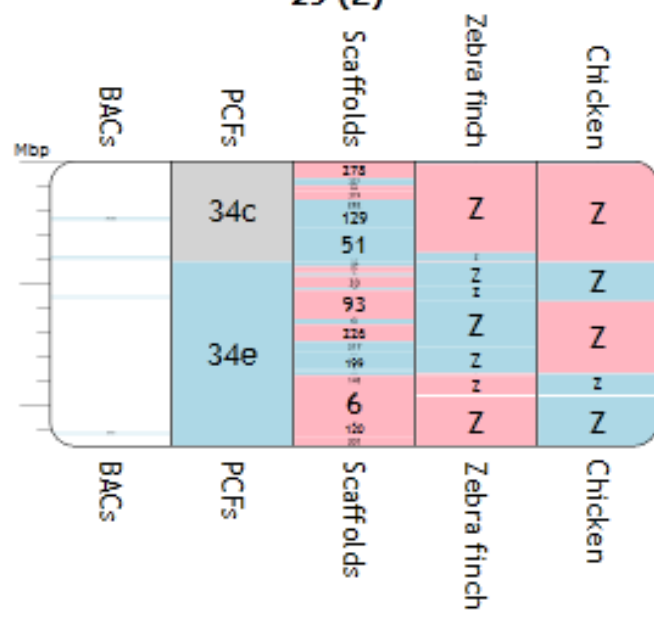





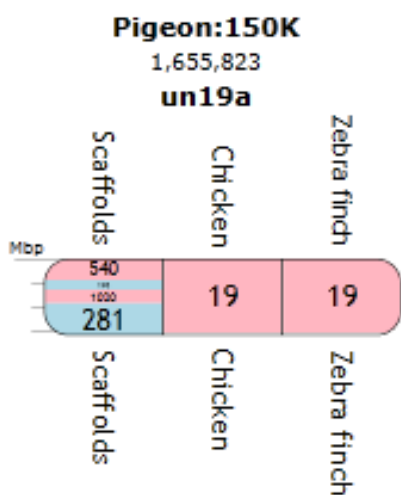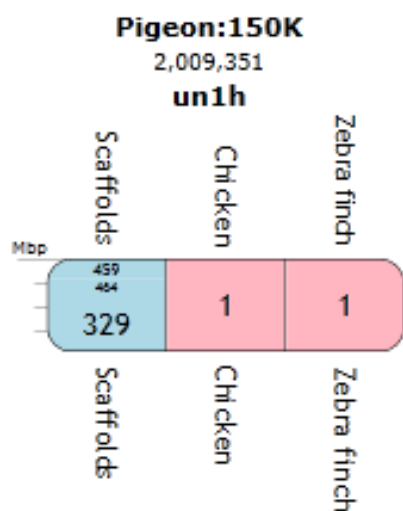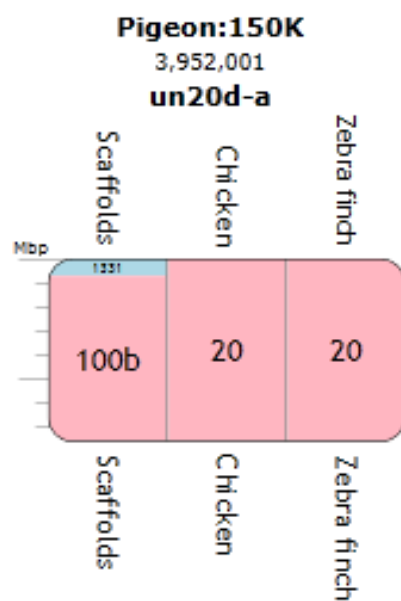

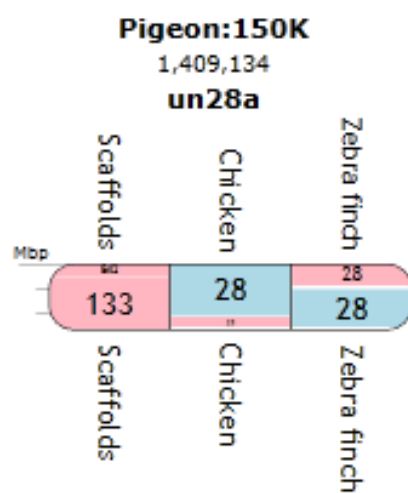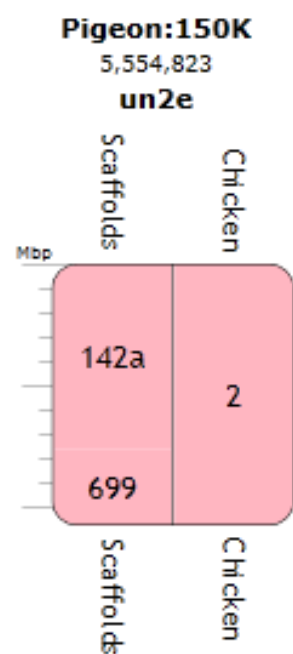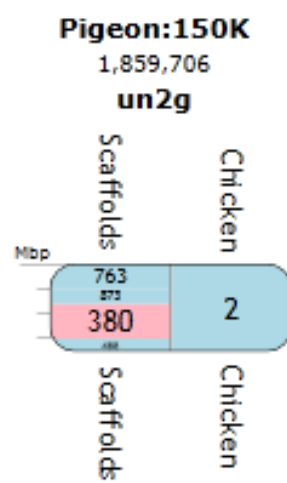

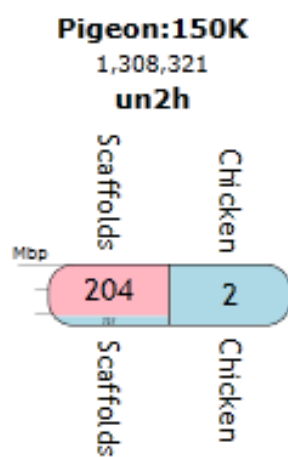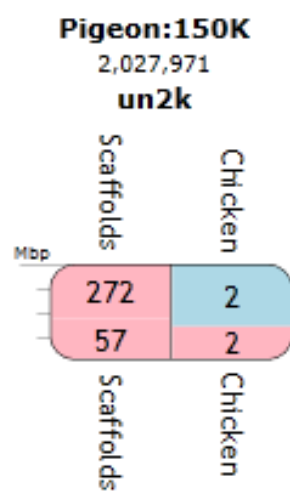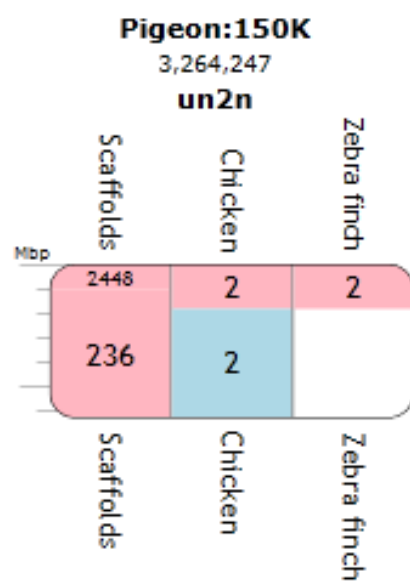

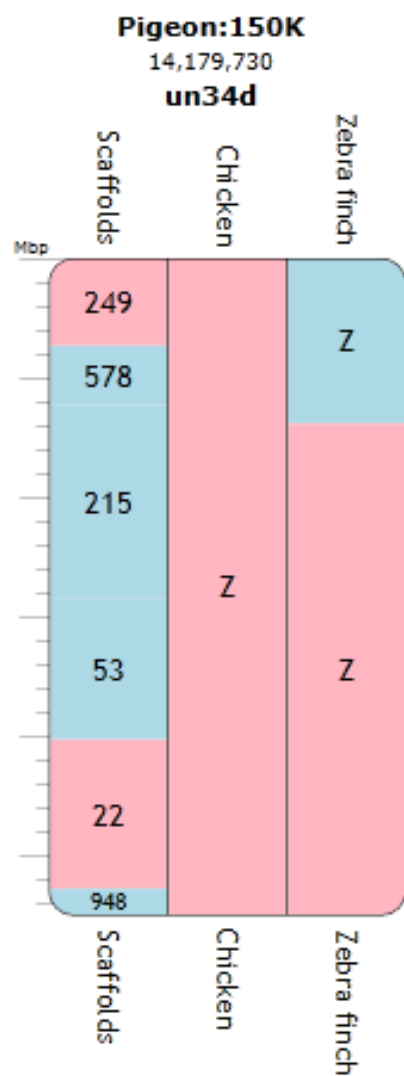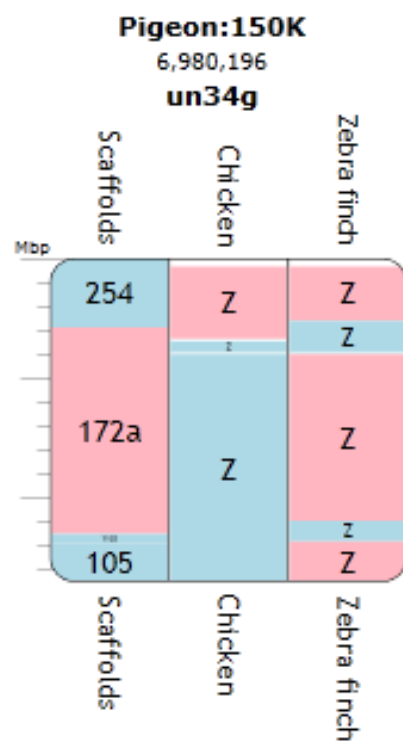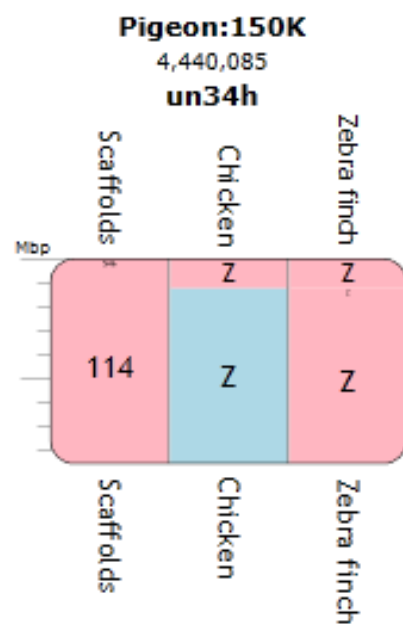

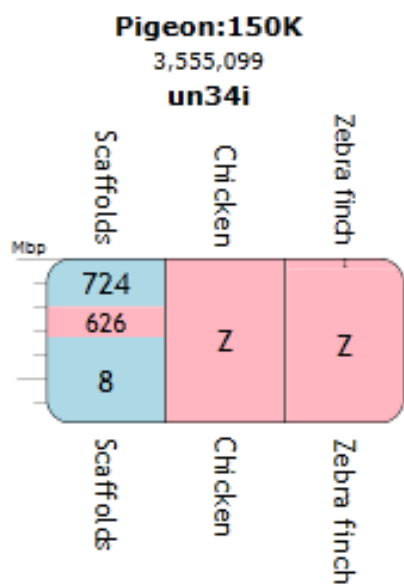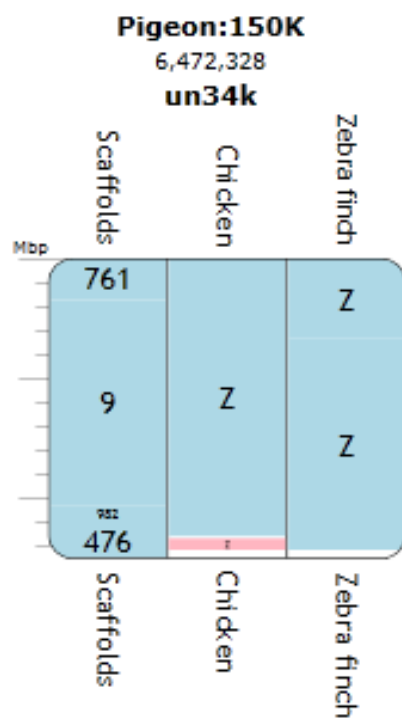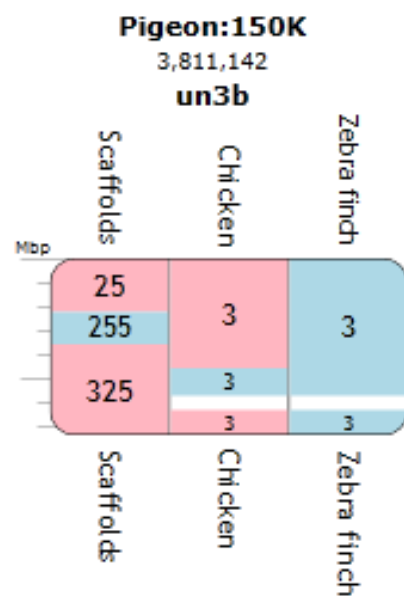

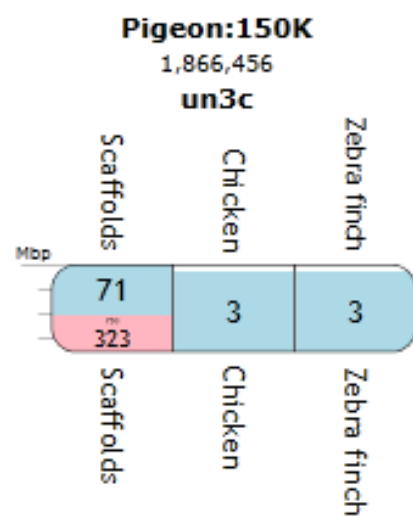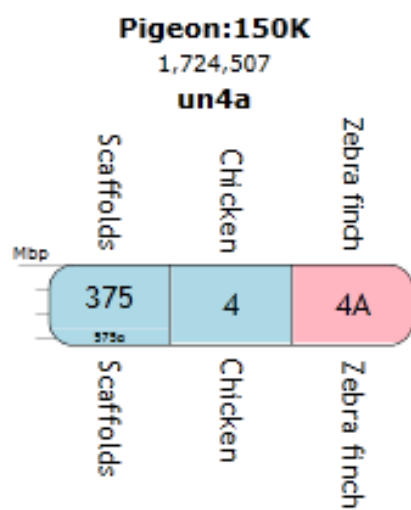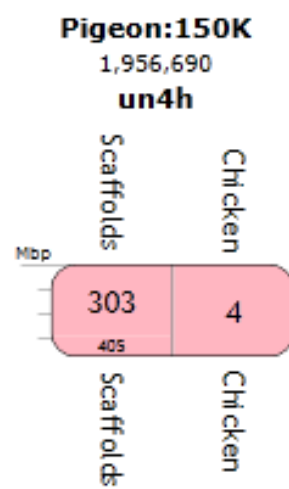

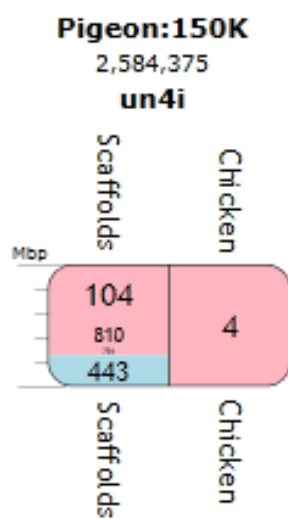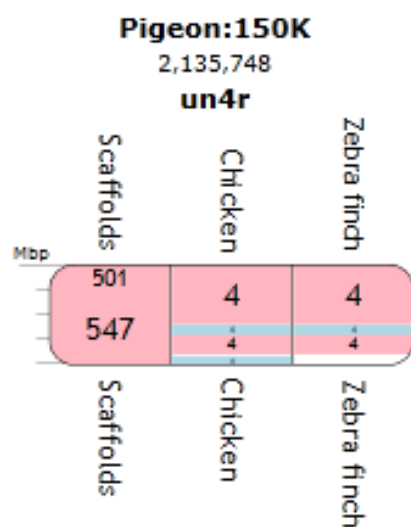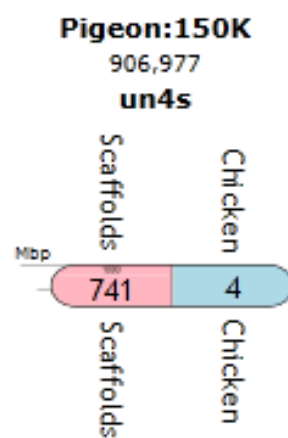

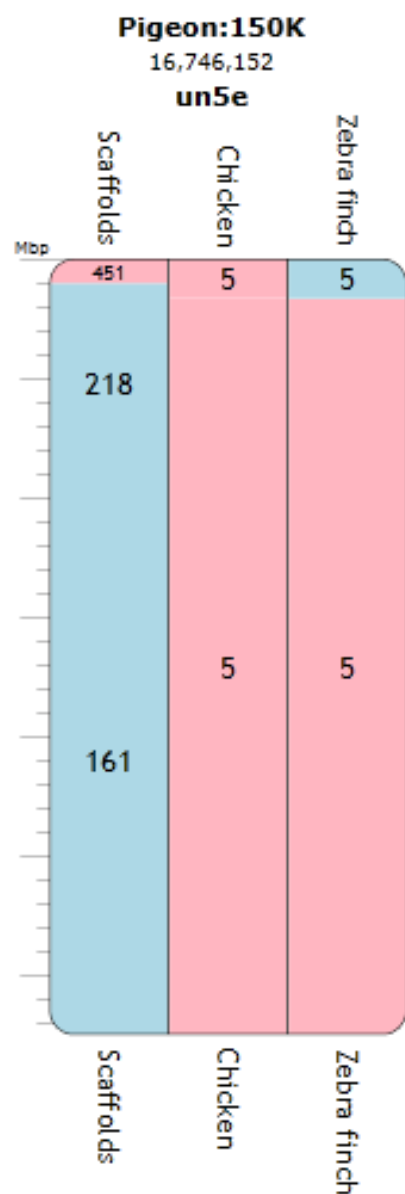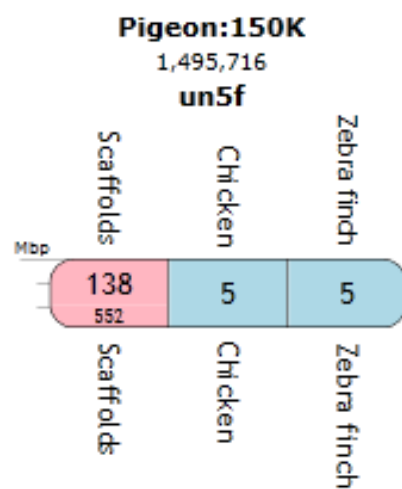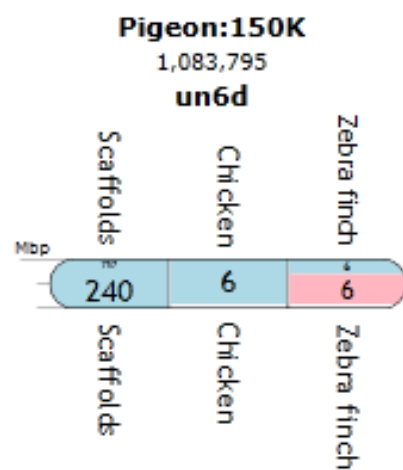



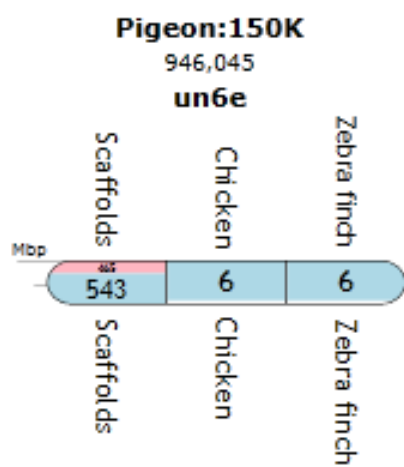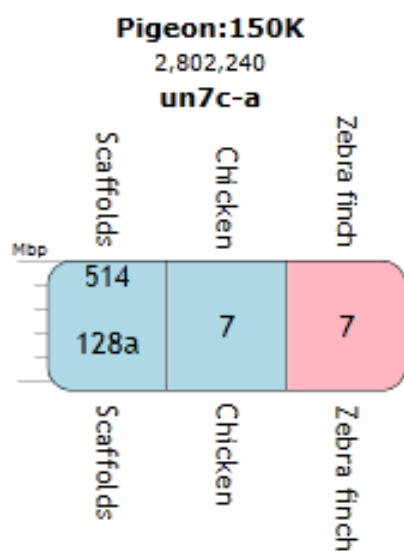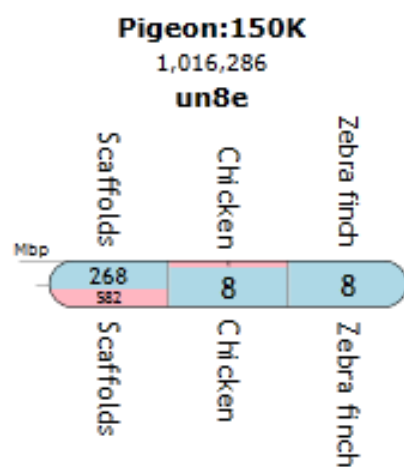

**Pigeon:150K**

3,819,946

**un9b**

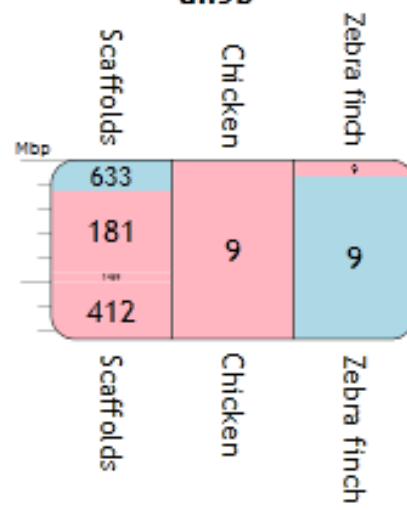

**Supplemental Figure S4.** Pigeon chromosomes and unplaced PCFs visualizations from Evolution Highway (<http://eh-demo.ncsa.uiuc.edu/birds>). Blue blocks represent “+” orientation, pink blocks denote “-” orientation and grey blocks unknown (“?”) orientation. “BACs” track depicts the location of the BAC clones used to place and orient predicted chromosome fragments (PCFs) along the chromosomes. “PCFs” track depicts the position and orientation of the PCFs obtained from RACA (Kim et al. 2013). “Scaffolds” track depicts the position and orientation of the Cliv\_1.0 scaffolds (Shapiro et al. 2013). “Chicken” and “Zebra finch” tracks depict the pairwise homologous synteny blocks (HSBs) between pigeon and chicken, pigeon and zebra finch genomes, respectively.
